# Supplementary material for: Calcium carbide as the acetylide source: transition-metal-free synthesis of substituted pyrazoles via [1,5]-sigmatropic rearrangements
Source: Royal Society of Chemistry journal article supplement (doi:10.1039/c6gc02776h), 2016-01-01

# Supporting Information

## Calcium Carbide as the Acetylide Source: Transition-Metal-Free Synthesis of Substituted Pyrazoles via [1,5]-Sigmatropic Rearrangements

Yue Yu, Wei Huang, Yang Chen, Bingjie Gao, Wanqing Wu\* and Huanfeng Jiang\*  
*Key Laboratory of Functional Molecular Engineering of Guangdong Province, School of Chemistry and Chemical Engineering, School of Chemistry and Chemical Engineering, South China University of Technology, Guangzhou 510640, P. R. China*

*E-mail: cewuwq@scut.edu.cn, jianghf@scut.edu.cn*

### List of Contents

|                                                                 |            |
|-----------------------------------------------------------------|------------|
| <b>A. General Methods .....</b>                                 | <b>S2</b>  |
| <b>B. General Procedure for the Preparation of 3 and 5.....</b> | <b>S2</b>  |
| <b>C. Optimization of the Reaction Conditions.....</b>          | <b>S3</b>  |
| <b>D. Gram-Scale Experiment .....</b>                           | <b>S3</b>  |
| <b>E. Analytical Data .....</b>                                 | <b>S4</b>  |
| <b>F. NMR Spectra.....</b>                                      | <b>S13</b> |

## A. General Methods

$^1\text{H}$  and  $^{13}\text{C}$  NMR spectra were recorded using a Bruker DRX-400 spectrometer using  $\text{CDCl}_3$  as solvent. The chemical shifts are referenced to signals at 7.26 and 77.0 ppm, respectively. Mass spectra were recorded on a Thermo Scientific ISQ gas chromatograph-mass spectrometer. The data of HRMS was carried out on a high-resolution mass spectrometer (LCMS-IT-TOF). IR spectra were obtained either as potassium bromide pellets or as liquid films between two potassium bromide pellets with a Bruker TENSOR 27 spectrometer. Melting points were determined with a Büchi Melting Point B-545 instrument.

## B. General Procedure for the Preparation of **3** and **5**

In a Schlenk tube, a mixture of *N*-tosylhydrazones (0.5 mmol),  $\text{CaC}_2$  (2 mmol) and  $\text{Cs}_2\text{CO}_3$  (0.5 mmol) was stirred in DMSO (2 mL). Then  $\text{H}_2\text{O}$  (2.5 mmol) was added by using a microliter syringe. The mixture was allowed to stir at 80 °C for 6 h. After completion of the reaction (monitored by TLC), water (10 mL) was added to the reaction mixture, and the resulting mixture was extracted with ethyl acetate. The combined organic layers were then dried over  $\text{MgSO}_4$ , filtered, and then concentrated in vacuo. The residue was purified by flash chromatography on silica gel to give **3** or **5**.

### C. Optimization of the Reaction Conditions

**Table S1.** Screening of the Amount of Water for Reaction<sup>a</sup>

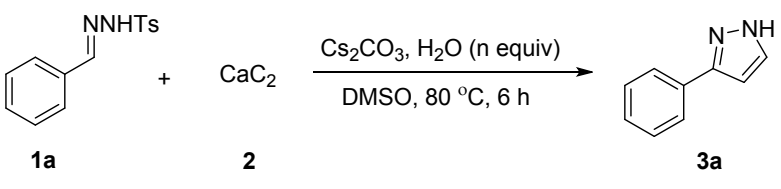

| Entry | n (equiv) | Yield of <b>3a</b> <sup>b</sup> (%) |
|-------|-----------|-------------------------------------|
| 1     | 1         | 59                                  |
| 2     | 4         | 71                                  |
| 3     | 5         | 86                                  |
| 4     | 6         | 84                                  |
| 5     | 10        | 79                                  |

<sup>a</sup> Reaction conditions: All reactions were performed with **1a** (0.5 mmol), **2a** (2 mmol), base (0.5 mmol) and 2.0 mL solvent at 80 °C for 6 h unless otherwise noted. <sup>b</sup> Yields were analyzed by GC-MS using *n*-dodecane as an internal standard.

### D. Gram-Scale Experiment

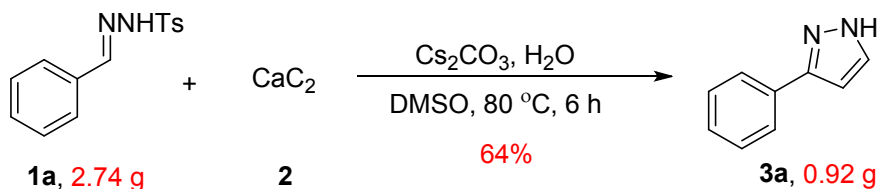

**Scheme S1.** Gram-scale synthesis of **3a** from **1a** and  $\text{CaC}_2$ .

In a 200 mL two-necked round-bottom flask with a reflux condenser, a mixture of *N*-tosylhydrazone **1a** (2.74 g, 10 mmol),  $\text{CaC}_2$  (2.56 g, 40 mmol) and  $\text{Cs}_2\text{CO}_3$  (3.26 g, 10 mmol) were added in DMSO (40 mL). The flask was then sealed with a wizened balloon and a rubber plug, respectively. After stirring at room temperature for 5 min, water (0.9 mL, 50 mmol) was added using an injector. The mixture was allowed to stir at 80 °C for 6 h. After completion of the reaction (monitored by TLC), water (100×3 mL) was added to the reaction mixture, and the resulting mixture was extracted with ethyl acetate for 3 times. The combined organic layers were then dried over  $\text{MgSO}_4$ , filtered, and then concentrated in vacuo. The residue was purified by flash chromatography on silica gel to give **3a** as a yellow oil.

## E. Analytical Data

### 3-Phenyl-1H-pyrazole (3a)

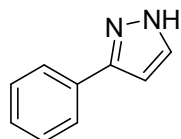

Yellow oil (56.9 mg, 79%); IR (KBr): 3172, 2964, 1456, 758, 693  $\text{cm}^{-1}$ ;  $^1\text{H}$  NMR (400 MHz,  $\text{CDCl}_3$ )  $\delta$  ppm 10.08 (s, 1H), 7.77 (d,  $J = 7.7$  Hz, 2H), 7.61 (s, 1H), 7.40 (t,  $J = 7.5$  Hz, 2H), 7.37-7.30 (m, 1H), 6.62 (s, 1H);  $^{13}\text{C}$  NMR (100 MHz,  $\text{CDCl}_3$ )  $\delta$  ppm 149.0, 133.3, 132.1, 128.8, 128.0, 125.8, 102.6; MS (EI, 70 eV)  $m/z$ : 144.07, 115.07, 90.07, 77.06; HRMS ESI ( $m/z$ ): calcd for  $\text{C}_9\text{H}_9\text{N}_2$  [ $\text{M} + \text{H}$ ] $^+$ : 145.0760, found: 145.0763.

### 3-(*p*-Tolyl)-1H-pyrazole (3b)

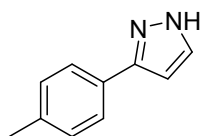

Light yellow oil (57.0 mg, 72%); IR (KBr): 3173, 2924, 1515, 1454, 821  $\text{cm}^{-1}$ ;  $^1\text{H}$  NMR (400 MHz,  $\text{CDCl}_3$ )  $\delta$  ppm 10.14 (s, 1H), 7.65 (d,  $J = 8.1$  Hz, 2H), 7.60 (d,  $J = 2.1$  Hz, 1H), 7.21 (d,  $J = 8.0$  Hz, 2H), 6.58 (d,  $J = 2.1$  Hz, 1H), 2.39 (s, 3H);  $^{13}\text{C}$  NMR (100 MHz,  $\text{CDCl}_3$ )  $\delta$  ppm 148.7, 137.8, 133.7, 129.4, 129.1, 125.7, 102.3, 21.2; MS (EI, 70 eV)  $m/z$ : 158.25, 130.19, 90.07, 77.15; HRMS ESI ( $m/z$ ): calcd for  $\text{C}_{10}\text{H}_{11}\text{N}_2$  [ $\text{M} + \text{H}$ ] $^+$ : 159.0917, found: 159.0922.

### 3-(4-Chlorophenyl)-1H-pyrazole (3c)

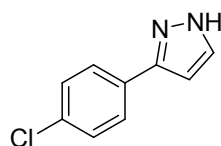

Light yellow solid (63.2 mg, 71%), mp 83.0-84.0  $^{\circ}\text{C}$ ; IR (KBr): 3173, 2957, 1499, 1489, 1094, 829, 767  $\text{cm}^{-1}$ ;  $^1\text{H}$  NMR (400 MHz,  $\text{CDCl}_3$ )  $\delta$  ppm 11.49 (s, 1H), 7.69-7.64 (m, 2H), 7.57 (d,  $J = 2.2$  Hz, 1H), 7.36-7.31 (m, 2H), 6.57 (d,  $J = 2.1$  Hz, 1H);  $^{13}\text{C}$  NMR (100 MHz,  $\text{CDCl}_3$ )  $\delta$  ppm 148.7, 133.8, 132.6, 130.8, 128.9, 127.1, 102.7; MS (EI, 70 eV)  $m/z$ : 178.02, 151.01, 115.06, 89.05; HRMS ESI ( $m/z$ ): calcd for  $\text{C}_9\text{H}_8\text{ClN}_2$  [ $\text{M} + \text{H}$ ] $^+$ : 179.0371, found: 179.0373.

### 4-(1H-Pyrazol-3-yl)benzonitrile (3d)

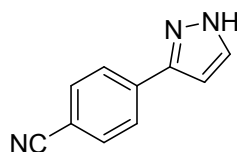

Yellow solid (49.9 mg, 59%), mp 141.8-143.2  $^{\circ}\text{C}$ ; IR (KBr): 3308, 2959, 2227, 1608, 1410, 843, 771  $\text{cm}^{-1}$ ;  $^1\text{H}$  NMR (400 MHz,  $\text{CDCl}_3$ )  $\delta$  ppm 9.56 (s, 1H), 7.87 (d,  $J = 7.8$  Hz, 2H), 7.66 (d,  $J = 9.1$  Hz, 3H), 6.69 (s, 1H);  $^{13}\text{C}$  NMR (100 MHz,  $\text{CDCl}_3$ )  $\delta$  ppm 148.9, 137.1, 132.5, 131.5, 126.1, 118.8, 111.0, 103.5; MS (EI, 70 eV)  $m/z$ : 169.05, 142.06, 115.07, 102.05;

HRMS ESI (*m/z*): calcd for C<sub>10</sub>H<sub>7</sub>N<sub>3</sub>Na [M + Na]<sup>+</sup>: 192.0532, found: 192.0535.

### 3-(4-Methoxyphenyl)-1*H*-pyrazole (3e)

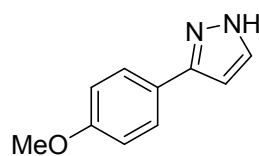

White solid (72.2 mg, 83%), mp 98.1-99.7 °C; IR (KBr): 3123, 2914, 2836, 1612, 1250, 837, 781 cm<sup>-1</sup>; <sup>1</sup>H NMR (400 MHz, CDCl<sub>3</sub>) δ ppm 10.88 (s, 1H), 7.64 (d, *J* = 8.6 Hz, 2H), 7.55 (d, *J* = 1.7 Hz, 1H), 6.87 (d, *J* = 8.6 Hz, 2H), 6.49 (d, *J* = 1.7 Hz, 1H), 3.79 (s, 3H); <sup>13</sup>C NMR (100 MHz, CDCl<sub>3</sub>) δ ppm 159.4, 148.4, 133.6, 127.1, 124.7, 114.1, 102.0, 55.2; MS (EI, 70 eV) *m/z*: 174.06, 159.04, 131.07, 103.07; HRMS ESI (*m/z*): calcd for C<sub>10</sub>H<sub>11</sub>N<sub>2</sub>O [M + H]<sup>+</sup>: 175.0866, found: 175.0868.

### 3-(4-(*tert*-Butyl)phenyl)-1*H*-pyrazole (3f)

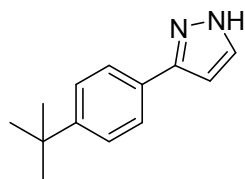

Light yellow solid (66.0 mg, 66%), mp 77.6-78.7 °C; IR (KBr): 3177, 2959, 1516, 1460, 836, 776 cm<sup>-1</sup>; <sup>1</sup>H NMR (400 MHz, CDCl<sub>3</sub>) δ ppm 11.75 (s, 1H), 7.75-7.69 (m, 2H), 7.61 (d, *J* = 2.1 Hz, 1H), 7.49-7.41 (m, 2H), 6.60 (d, *J* = 2.1 Hz, 1H), 1.37 (s, 9H); <sup>13</sup>C NMR (100 MHz, CDCl<sub>3</sub>) δ ppm 151.1, 148.5, 133.8, 129.1, 125.7, 125.6, 102.4, 34.6, 31.3; MS (EI, 70 eV) *m/z*: 200.12, 185.10, 157.09, 115.07; HRMS ESI (*m/z*): calcd for C<sub>13</sub>H<sub>17</sub>N<sub>2</sub> [M + H]<sup>+</sup>: 201.1386, found: 201.1386.

### *N,N*-Dimethyl-4-(1*H*-pyrazol-3-yl)aniline (3g)

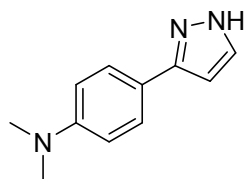

Brown solid (74.8 mg, 80%), mp 153.6-155.4 °C; IR (KBr): 3144, 2922, 1613, 1519, 1213, 817, 770 cm<sup>-1</sup>; <sup>1</sup>H NMR (400 MHz, CDCl<sub>3</sub>) δ ppm 10.11 (s, 1H), 7.58 (dd, *J* = 8.4, 5.1 Hz, 3H), 6.70 (d, *J* = 8.7 Hz, 2H), 6.45 (d, *J* = 1.4 Hz, 1H), 2.94 (s, 6H); <sup>13</sup>C NMR (100 MHz, CDCl<sub>3</sub>) δ ppm 150.3, 147.9, 135.0, 126.7, 119.7, 112.4, 101.3, 40.4; MS (EI, 70 eV) *m/z*: 187.10, 158.09, 143.08, 115.06; HRMS ESI (*m/z*): calcd for C<sub>11</sub>H<sub>14</sub>N<sub>3</sub> [M + H]<sup>+</sup>: 188.1182, found: 188.1183.

### 3-(3-Bromophenyl)-1*H*-pyrazole (3h)

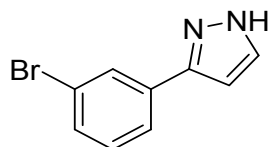

Light yellow oil (68.8 mg, 62%); IR (KBr): 3172, 2929, 1566, 880, 767, 682 cm<sup>-1</sup>; <sup>1</sup>H NMR (400 MHz, CDCl<sub>3</sub>) δ ppm 8.04 (d, *J* = 83.0 Hz, 2H), 7.73-7.58 (m, 2H),

7.45 (d,  $J = 7.9$  Hz, 1H), 7.26 (t,  $J = 7.9$  Hz, 1H), 6.62 (s, 1H);  $^{13}\text{C}$  NMR (100 MHz,  $\text{CDCl}_3$ )  $\delta$  ppm 148.8, 134.6, 132.1, 130.9, 130.3, 128.8, 124.4, 122.9, 103.0; MS (EI, 70 eV)  $m/z$ : 221.97, 143.08, 116.10, 89.08; HRMS ESI ( $m/z$ ): calcd for  $\text{C}_9\text{H}_8\text{BrN}_2$   $[\text{M} + \text{H}]^+$ : 222.9865, found: 222.9867.

### 3-(3-Fluorophenyl)-1H-pyrazole (3i)

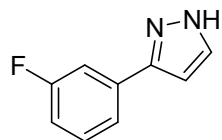

Light yellow oil (52.7 mg, 65%); IR (KBr): 3178, 2932, 1590, 859, 771, 682  $\text{cm}^{-1}$ ;  $^1\text{H}$  NMR (400 MHz,  $\text{CDCl}_3$ )  $\delta$  ppm 11.18 (s, 1H), 7.61 (s, 1H), 7.54 (d,  $J = 7.7$  Hz, 1H), 7.48 (d,  $J = 10.0$  Hz, 1H), 7.35 (dd,  $J = 14.3, 7.6$  Hz, 1H), 7.02 (td,  $J = 8.2, 1.5$  Hz, 1H), 6.61 (s, 1H);  $^{13}\text{C}$  NMR (100 MHz,  $\text{CDCl}_3$ )  $\delta$  ppm 163.1 ( $J = 243.9$  Hz), 149.0, 134.7 ( $J = 8.1$  Hz), 132.3, 130.3 ( $J = 8.3$  Hz), 121.5 ( $J = 2.6$  Hz), 114.7 ( $J = 21.1$  Hz), 112.7 ( $J = 22.6$  Hz), 103.0; MS (EI, 70 eV)  $m/z$ : 162.08, 133.07, 108.08, 95.06; HRMS ESI ( $m/z$ ): calcd for  $\text{C}_9\text{H}_8\text{FN}_2$   $[\text{M} + \text{H}]^+$ : 163.0666, found: 163.0669.

### 3-(*o*-Tolyl)-1H-pyrazole (3j)

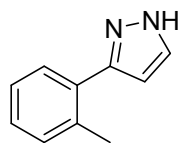

Yellow oil (51.4 mg, 65%); IR (KBr): 3174, 2946, 1455, 943, 759  $\text{cm}^{-1}$ ;  $^1\text{H}$  NMR (400 MHz,  $\text{CDCl}_3$ )  $\delta$  ppm 10.70 (s, 1H), 7.52 (d,  $J = 2.0$  Hz, 1H), 7.45 (d,  $J = 7.3$  Hz, 1H), 7.27-7.18 (m, 3H), 6.40 (d,  $J = 2.0$  Hz, 1H), 2.39 (s, 3H);  $^{13}\text{C}$  NMR (100 MHz,  $\text{CDCl}_3$ )  $\delta$  ppm 147.0, 136.1, 134.2, 131.5, 130.8, 129.2, 128.2, 125.9, 105.4, 20.8; MS (EI, 70 eV)  $m/z$ : 158.24, 130.21, 103.17, 77.15; HRMS ESI ( $m/z$ ): calcd for  $\text{C}_{10}\text{H}_{11}\text{N}_2$   $[\text{M} + \text{H}]^+$ : 159.0917, found: 159.0914.

### 3-(5-Bromo-2-methoxyphenyl)-1H-pyrazole (3k)

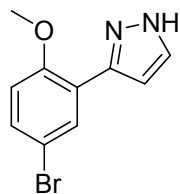

Yellow solid (74.3 mg, 59%), mp 119.2-120.9  $^\circ\text{C}$ ; IR (KBr): 3177, 2929, 1588, 1466, 1251, 1031, 765  $\text{cm}^{-1}$ ;  $^1\text{H}$  NMR (400 MHz,  $\text{CDCl}_3$ )  $\delta$  ppm 9.92 (s, 1H), 7.81 (d,  $J = 2.3$  Hz, 1H), 7.62 (d,  $J = 1.1$  Hz, 1H), 7.36 (dd,  $J = 8.8, 2.3$  Hz, 1H), 6.86 (d,  $J = 8.8$  Hz, 1H), 6.65 (s, 1H), 3.94 (s, 3H);  $^{13}\text{C}$  NMR (100 MHz,  $\text{CDCl}_3$ )  $\delta$  ppm 154.9, 140.2, 138.0, 131.5, 130.5, 120.3, 113.6, 113.3, 103.7, 56.0; MS (EI, 70 eV)  $m/z$ : 251.94, 224.97, 144.09, 102.05; HRMS ESI ( $m/z$ ): calcd for  $\text{C}_{10}\text{H}_{10}\text{BrN}_2\text{O}$   $[\text{M} + \text{H}]^+$ : 252.9971, found: 252.9969.

### 3-(Naphthalen-1-yl)-1H-pyrazole (3l)

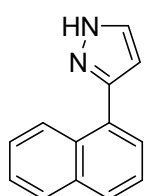

Yellow solid (55.3 mg, 57%), mp 113.7-115.2  $^\circ\text{C}$ ; IR (KBr): 3161, 3053, 1516, 1384, 777  $\text{cm}^{-1}$ ;  $^1\text{H}$  NMR (400 MHz,  $\text{CDCl}_3$ )  $\delta$  ppm 11.95 (s, 1H), 8.33-8.22 (m, 1H), 7.83 (dd,  $J = 7.4,$

1.9 Hz, 1H), 7.78 (d,  $J = 8.2$  Hz, 1H), 7.54 (dd,  $J = 7.1, 1.2$  Hz, 1H), 7.47-7.34 (m, 3H), 7.28 (d,  $J = 2.1$  Hz, 1H), 6.48 (d,  $J = 2.1$  Hz, 1H);  $^{13}\text{C}$  NMR (100 MHz,  $\text{CDCl}_3$ )  $\delta$  ppm 147.5, 133.8, 132.7, 131.4, 130.3, 128.5, 128.3, 127.1, 126.4, 125.9, 125.7, 125.2, 106.0; MS (EI, 70 eV)  $m/z$ : 194.08, 166.09, 139.06, 96.93; HRMS ESI ( $m/z$ ): calcd for  $\text{C}_{13}\text{H}_{11}\text{N}_2$   $[\text{M} + \text{H}]^+$ : 195.0917, found: 195.0921.

### 3-Phenethyl-1H-pyrazole (3m)

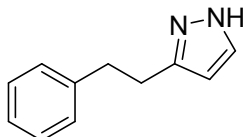

Light yellow oil (36.1mg, 42%); IR (KBr): 3191, 2928, 1590, 1453, 1360, 757, 700  $\text{cm}^{-1}$ ;  $^1\text{H}$  NMR (400 MHz,  $\text{CDCl}_3$ )  $\delta$  ppm 7.55 (d,  $J = 61.9$  Hz, 2H), 7.27 (t,  $J = 7.4$  Hz, 2H), 7.19 (t,  $J = 8.6$  Hz, 3H), 6.07 (s, 1H), 3.03-2.94 (m, 4H);  $^{13}\text{C}$  NMR (100 MHz,  $\text{CDCl}_3$ )  $\delta$  ppm 147.7, 141.2, 134.2, 128.4, 128.3, 126.1, 103.7, 35.6, 28.7; MS (EI, 70 eV)  $m/z$ : 172.09, 157.07, 91.05, 81.03; HRMS ESI ( $m/z$ ): calcd for  $\text{C}_{11}\text{H}_{13}\text{N}_2$   $[\text{M} + \text{H}]^+$ : 173.1073, found: 173.1075.

### 3-(Thiophen-2-yl)-1H-pyrazole (3n)

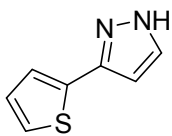

Brown oil (38.3 mg, 51%); IR (KBr): 3175, 2927, 1520, 1048, 838, 767, 698  $\text{cm}^{-1}$ ;  $^1\text{H}$  NMR (400 MHz,  $\text{CDCl}_3$ )  $\delta$  ppm 10.23 (s, 1H), 7.62 (s, 1H), 7.34 (s, 1H), 7.26 (d,  $J = 4.7$  Hz, 1H), 7.06 (s, 1H), 6.54 (s, 1H);  $^{13}\text{C}$  NMR (100 MHz,  $\text{CDCl}_3$ )  $\delta$  ppm 145.5, 135.7, 131.5, 127.6, 124.6, 124.1, 102.7; MS (EI, 70 eV)  $m/z$ : 150.00, 121.00, 96.00, 78.07; HRMS ESI ( $m/z$ ): calcd for  $\text{C}_7\text{H}_7\text{N}_2\text{S}$   $[\text{M} + \text{H}]^+$ : 151.0324, found: 151.0326.

### 3-(1H-Pyrazol-3-yl)pyridine (3o)

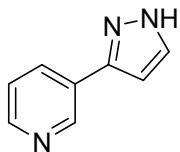

Light yellow oil (53.0 mg, 73%); IR (KBr): 3167, 2913, 1579, 1416, 1040, 766  $\text{cm}^{-1}$ ;  $^1\text{H}$  NMR (400 MHz,  $\text{CDCl}_3$ )  $\delta$  ppm 9.03 (s, 1H), 8.50 (s, 1H), 8.05 (d,  $J = 7.7$  Hz, 1H), 7.60 (s, 1H), 7.28 (d,  $J = 4.5$  Hz, 1H), 6.60 (s, 1H);  $^{13}\text{C}$  NMR (100 MHz,  $\text{CDCl}_3$ )  $\delta$  ppm 148.1, 146.7, 146.6, 133.2, 131.8, 128.9, 123.7, 102.6; MS (EI, 70 eV)  $m/z$ : 145.23, 119.20, 91.17, 78.15; HRMS ESI ( $m/z$ ): calcd for  $\text{C}_8\text{H}_8\text{N}_3$   $[\text{M} + \text{H}]^+$ : 146.0713, found: 146.0715.

### 3-Methyl-4-phenyl-1H-pyrazole (5a)

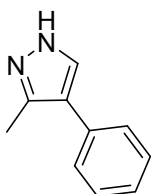

Brown oil (60.9 mg, 77%); IR (KBr): 3215, 2931, 1603, 1443, 760, 697  $\text{cm}^{-1}$ ;  $^1\text{H}$  NMR (400 MHz,  $\text{CDCl}_3$ )  $\delta$  ppm 7.62 (d,  $J = 3.3$  Hz, 1H), 7.38-7.27 (m, 6H), 1.72 (s, 3H);  $^{13}\text{C}$  NMR

(100 MHz, CDCl<sub>3</sub>)  $\delta$  ppm 146.0, 142.7, 135.5, 128.7, 128.0, 126.4, 98.5, 21.6; MS (EI, 70 eV)  $m/z$ : 158.24, 130.21, 103.19, 89.18; HRMS ESI ( $m/z$ ): calcd for C<sub>10</sub>H<sub>11</sub>N<sub>2</sub> [M + H]<sup>+</sup>: 159.0917, found: 159.0919.

### 3-Methyl-4-(*p*-tolyl)-1*H*-pyrazole (5b)

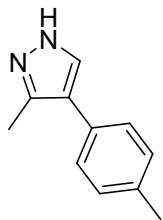

Brown oil (68.0mg, 79%); IR (KBr): 3208, 2927, 1515, 1444, 814, 707 cm<sup>-1</sup>; <sup>1</sup>H NMR (400 MHz, CDCl<sub>3</sub>)  $\delta$  ppm 7.59 (d,  $J$  = 3.2 Hz, 1H), 7.28-7.21 (m, 3H), 7.13 (d,  $J$  = 7.9 Hz, 2H), 2.31 (s, 3H), 1.70 (s, 3H); <sup>13</sup>C NMR (100 MHz, CDCl<sub>3</sub>)  $\delta$  ppm 146.2, 143.5, 137.8, 132.5, 129.4, 126.3, 98.3, 21.5, 20.9; MS (EI, 70 eV)  $m/z$ : 172.10, 130.08, 103.07, 77.06; HRMS

ESI ( $m/z$ ): calcd for C<sub>11</sub>H<sub>13</sub>N<sub>2</sub> [M + H]<sup>+</sup>: 173.1073, found: 173.1074.

### 4-(4-Iodophenyl)-3-methyl-1*H*-pyrazole (5c)

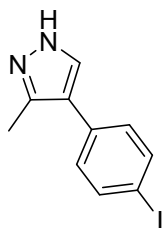

Brown oil (99.4 mg, 70%); IR (KBr): 3670, 1420, 1344, 1251, 805 cm<sup>-1</sup>; <sup>1</sup>H NMR (400 MHz, CDCl<sub>3</sub>)  $\delta$  ppm 7.66-7.62 (m, 2H), 7.60 (d,  $J$  = 3.3 Hz, 1H), 7.23 (d,  $J$  = 3.3 Hz, 1H), 7.12-7.07 (m, 2H), 1.67 (s, 3H); <sup>13</sup>C NMR (100 MHz, CDCl<sub>3</sub>)  $\delta$  ppm 145.3, 142.9, 137.7, 135.3, 128.3, 97.9, 93.6, 21.5; MS (EI, 70 eV)  $m/z$ : 283.92, 157.08, 130.07, 103.07; HRMS

ESI ( $m/z$ ): calcd for C<sub>10</sub>H<sub>10</sub>IN<sub>2</sub>[M + H]<sup>+</sup>: 284.9883, found: 284.9880.

### Methyl 4-(3-Methyl-1*H*-pyrazol-4-yl)benzoate (5d)

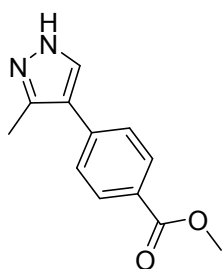

Brown oil (62.7 mg, 58%); IR (KBr): 3099, 2951, 1720, 1609, 1283, 1112, 772 cm<sup>-1</sup>; <sup>1</sup>H NMR (400 MHz, CDCl<sub>3</sub>)  $\delta$  ppm 8.00 (d,  $J$  = 8.4 Hz, 2H), 7.65 (d,  $J$  = 3.3 Hz, 1H), 7.45 (d,  $J$  = 8.4 Hz, 2H), 7.31 (d,  $J$  = 3.3 Hz, 1H), 3.90 (s, 3H), 1.74 (s, 3H); <sup>13</sup>C NMR (100 MHz, CDCl<sub>3</sub>)  $\delta$  ppm 166.4, 145.3, 143.0, 140.5, 129.9, 129.7, 126.4, 98.2, 52.0, 21.6; MS (EI, 70 eV)  $m/z$ : 216.06, 185.04, 130.07, 103.06; HRMS ESI ( $m/z$ ): calcd for

C<sub>12</sub>H<sub>13</sub>N<sub>2</sub>O<sub>2</sub> [M + H]<sup>+</sup>: 217.0972, found: 217.0970.

### 3-Methyl-4-(4-(trifluoromethyl)phenyl)-1*H*-pyrazole (5e)

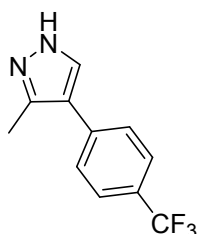

Brown oil 65.6 mg, 58%); IR (KBr): 2987, 2934, 1618, 1327, 1124, 843, 785 cm<sup>-1</sup>; <sup>1</sup>H NMR (400 MHz, CDCl<sub>3</sub>)  $\delta$  ppm 7.65 (d,  $J$  = 3.3 Hz, 1H), 7.59 (d,  $J$  = 8.3 Hz, 2H), 7.50



(d,  $J = 8.3$  Hz, 2H), 7.29 (d,  $J = 3.3$  Hz, 1H), 1.73 (s, 3H);  $^{13}\text{C}$  NMR (100 MHz,  $\text{CDCl}_3$ )  $\delta$  ppm 145.1, 143.2, 139.7 ( $J = 1.0$  Hz), 130.3 ( $J = 32.4$  Hz), 126.9, 125.7 ( $J = 7.5$  Hz), 123.9 ( $J = 270.6$  Hz), 98.1, 21.8; MS (EI, 70 eV)  $m/z$ : 226.06, 198.04, 157.07, 130.09; HRMS ESI ( $m/z$ ): calcd for  $\text{C}_{11}\text{H}_{10}\text{F}_3\text{N}_2$   $[\text{M} + \text{H}]^+$ : 227.0791, found: 227.0787.

### 3-Methyl-4-(4-(methylthio)phenyl)-1H-pyrazole (5f)

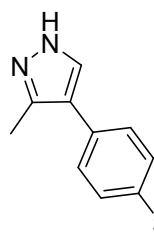

Brown oil (73.5 mg, 72%); IR (KBr): 3211, 2925, 1582, 1434, 1099, 848, 817  $\text{cm}^{-1}$ ;  $^1\text{H}$  NMR (400 MHz,  $\text{CDCl}_3$ )  $\delta$  ppm 7.61 (d,  $J = 3.3$  Hz, 1H), 7.26 (dd,  $J = 9.2, 5.9$  Hz, 3H), 7.21 (d,  $J = 8.4$  Hz, 2H), 2.46 (s, 3H), 1.70 (s, 3H);  $^{13}\text{C}$  NMR (100 MHz,  $\text{CDCl}_3$ )  $\delta$  ppm 145.8, 142.7, 138.6, 132.1, 126.9, 126.7, 98.1, 21.5, 15.7; MS (EI, 70 eV)  $m/z$ : 204.03, 189.03, 174.04, 102.05; HRMS ESI ( $m/z$ ): calcd for  $\text{C}_{11}\text{H}_{12}\text{N}_2\text{NaS}$   $[\text{M} + \text{Na}]^+$ : 227.0613, found: 227.0614.

### 4-(3-Fluorophenyl)-3-methyl-1H-pyrazole (5g)

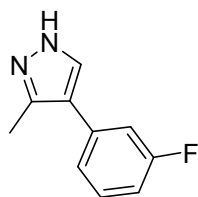

Brown oil (58.1 mg, 66%); IR (KBr): 3082, 2929, 1592, 1439, 1259, 782, 693  $\text{cm}^{-1}$ ;  $^1\text{H}$  NMR (400 MHz,  $\text{CDCl}_3$ )  $\delta$  ppm 7.63 (d,  $J = 3.3$  Hz, 1H), 7.28 (ddd,  $J = 13.0, 7.5, 4.8$  Hz, 2H), 7.15-7.08 (m, 2H), 6.99 (td,  $J = 8.3, 2.5$  Hz, 1H), 1.71 (s, 3H);  $^{13}\text{C}$  NMR (100 MHz,  $\text{CDCl}_3$ )  $\delta$  ppm 162.7 ( $J = 245.1$  Hz), 145.4, 143.0, 137.8 ( $J = 7.4$  Hz), 130.2 ( $J = 8.2$  Hz), 122.1 ( $J = 3.0$  Hz), 115.0 ( $J = 20.9$  Hz), 113.8 ( $J = 22.8$  Hz), 97.8, 21.6; MS (EI, 70 eV)  $m/z$ : 176.06, 148.05, 121.05, 107.03; HRMS ESI ( $m/z$ ): calcd for  $\text{C}_{10}\text{H}_{10}\text{FN}_2$   $[\text{M} + \text{H}]^+$ : 177.0823, found: 177.0824.

### 4-(3-Chlorophenyl)-3-methyl-1H-pyrazole (5h)

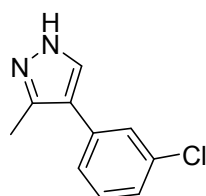

Brown oil (72.0 mg, 75%); IR (KBr): 3092, 2984, 1582, 1431, 784, 692  $\text{cm}^{-1}$ ;  $^1\text{H}$  NMR (400 MHz,  $\text{CDCl}_3$ )  $\delta$  ppm 7.63 (d,  $J = 3.3$  Hz, 1H), 7.36 (d,  $J = 1.2$  Hz, 1H), 7.29-7.24 (m, 4H), 1.70 (s, 3H);  $^{13}\text{C}$  NMR (100 MHz,  $\text{CDCl}_3$ )  $\delta$  ppm 145.3, 143.4, 137.4, 134.5, 129.9, 128.2, 126.7, 124.6, 97.9, 21.5; MS (EI, 70 eV)  $m/z$ : 192.01, 157.07, 130.07, 103.06; HRMS ESI ( $m/z$ ): calcd for  $\text{C}_{10}\text{H}_{10}\text{ClN}_2$   $[\text{M} + \text{H}]^+$ : 193.0527, found: 193.0529.

#### 4-(3-Bromophenyl)-3-methyl-1H-pyrazole (5i)

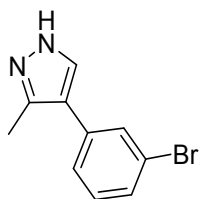

Brown oil (83.8 mg, 71%); IR (KBr): 3093, 1573, 1432, 1072, 897, 782, 698  $\text{cm}^{-1}$ ;  $^1\text{H}$  NMR (400 MHz,  $\text{CDCl}_3$ )  $\delta$  ppm 7.61 (d,  $J = 3.3$  Hz, 1H), 7.50 (t,  $J = 1.7$  Hz, 1H), 7.41 (d,  $J = 7.9$  Hz, 1H), 7.29 (d,  $J = 7.9$  Hz, 1H), 7.24 (d,  $J = 3.3$  Hz, 1H), 7.18 (t,  $J = 7.9$  Hz, 1H), 1.68 (s, 3H);  $^{13}\text{C}$  NMR (100 MHz,  $\text{CDCl}_3$ )  $\delta$  ppm 145.2, 143.1, 137.7, 131.1, 130.2, 129.6, 125.1, 122.7, 97.8, 21.6; MS (EI, 70 eV)  $m/z$ : 235.96, 157.06, 130.07, 103.06; HRMS ESI ( $m/z$ ): calcd for  $\text{C}_{10}\text{H}_{10}\text{BrN}_2$  [ $\text{M} + \text{H}$ ] $^+$ : 237.0022, found: 237.0017.

#### 3-Methyl-4-(*o*-tolyl)-1H-pyrazole (5j)

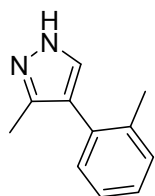

Brown oil (53.3 mg, 62%); IR (KBr): 3213, 2930, 1601, 1447, 1353, 757  $\text{cm}^{-1}$ ;  $^1\text{H}$  NMR (400 MHz,  $\text{CDCl}_3$ )  $\delta$  ppm 7.64 (d,  $J = 3.4$  Hz, 1H), 7.51 (dd,  $J = 6.1, 3.3$  Hz, 1H), 7.39 (d,  $J = 3.4$  Hz, 1H), 7.23-7.14 (m, 3H), 2.46 (s, 3H), 1.69 (s, 3H);  $^{13}\text{C}$  NMR (100 MHz,  $\text{CDCl}_3$ )  $\delta$  ppm 145.6, 142.2, 136.8, 134.8, 132.3, 128.0, 127.8, 126.2, 99.1, 21.9, 21.2; MS (EI, 70 eV)  $m/z$ : 172.08, 157.07, 130.07, 103.05; HRMS ESI ( $m/z$ ): calcd for  $\text{C}_{11}\text{H}_{13}\text{N}_2$  [ $\text{M} + \text{H}$ ] $^+$ : 173.1073, found: 173.1075

#### 4-(3,4-Dimethoxyphenyl)-3-methyl-1H-pyrazole (5k)

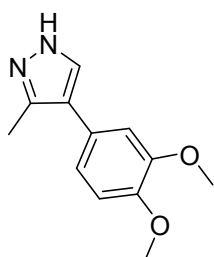

Yellow oil (98.2 mg, 90%); IR (KBr): 3339, 2940, 1586, 1514, 1251, 1149, 1024  $\text{cm}^{-1}$ ;  $^1\text{H}$  NMR (400 MHz,  $\text{CDCl}_3$ )  $\delta$  ppm 7.61 (d,  $J = 3.3$  Hz, 1H), 7.27 (d,  $J = 3.3$  Hz, 1H), 6.93-6.88 (m, 2H), 6.81 (d,  $J = 8.9$  Hz, 1H), 3.86 (d,  $J = 3.7$  Hz, 6H), 1.71 (s, 3H);  $^{13}\text{C}$  NMR (100 MHz,  $\text{CDCl}_3$ )  $\delta$  ppm 149.0, 148.9, 146.1, 142.5, 127.9, 118.7, 111.2, 110.0, 98.1, 55.9, 55.9, 21.7; MS (EI, 70 eV)  $m/z$ : 218.26, 203.24, 175.22, 131.19; HRMS ESI ( $m/z$ ): calcd for  $\text{C}_{12}\text{H}_{15}\text{N}_2\text{O}_2$  [ $\text{M} + \text{H}$ ] $^+$ : 219.1128, found: 219.1130.

#### 3-Methyl-4-(naphthalen-2-yl)-1H-pyrazole (5l)

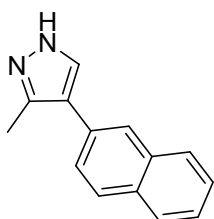

Brown solid (79.1 mg, 76%), mp 150.6-151.9  $^{\circ}\text{C}$ ; IR (KBr): 3199, 2931, 1746, 1601, 1245, 816, 748  $\text{cm}^{-1}$ ;  $^1\text{H}$  NMR (400 MHz,  $\text{CDCl}_3$ )  $\delta$  ppm 7.87 (s, 1H), 7.81 (d,  $J = 8.1$

Hz, 3H), 7.68 (d,  $J = 3.3$  Hz, 1H), 7.51-7.46 (m, 2H), 7.42 (dd,  $J = 8.6, 1.5$  Hz, 1H), 7.37 (d,  $J = 3.3$  Hz, 1H), 1.82 (s, 3H);  $^{13}\text{C}$  NMR (100 MHz,  $\text{CDCl}_3$ )  $\delta$  ppm 146.1, 142.8, 133.3, 133.0, 132.8, 128.4, 127.9, 127.5, 126.3, 126.3, 125.2, 124.4, 98.6, 21.5; MS (EI):  $m/z$  (%) = 208.09, 180.07, 166.07, 139.07; HRMS ESI ( $m/z$ ): calcd for  $\text{C}_{14}\text{H}_{13}\text{N}_2$   $[\text{M} + \text{H}]^+$ : 209.1073, found: 209.1075.

### 3-Methyl-4-phenethyl-1H-pyrazole (5m)

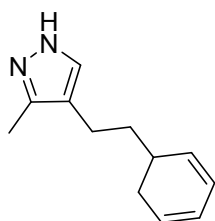

Brown oil (42.8 mg, 46%); IR (KBr): 2931, 2860, 1600, 1448, 1245, 759, 701  $\text{cm}^{-1}$ ;  $^1\text{H}$  NMR (400 MHz,  $\text{CDCl}_3$ )  $\delta$  ppm 7.58 (d,  $J = 3.3$  Hz, 1H), 7.25 (t,  $J = 7.4$  Hz, 2H), 7.17 (t,  $J = 7.3$  Hz, 1H), 7.09 (d,  $J = 7.2$  Hz, 2H), 6.92 (d,  $J = 3.3$  Hz, 1H), 2.38-2.19 (m, 4H), 1.44 (s, 3H);  $^{13}\text{C}$  NMR (100 MHz,  $\text{CDCl}_3$ )  $\delta$  ppm 145.6, 142.9, 141.1, 128.4, 128.2, 126.1, 96.1, 36.5, 30.8, 18.9; MS (EI, 70 eV)  $m/z$ : 186.08, 115.05, 95.06, 91.01; HRMS ESI ( $m/z$ ): calcd for  $\text{C}_{12}\text{H}_{14}\text{N}_2\text{Na}$   $[\text{M} + \text{Na}]^+$ : 209.1049, found: 209.1053.

### 3,4-Diphenyl-1H-pyrazole (5n)

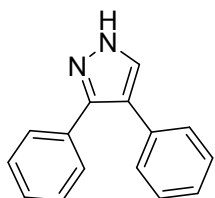

Light yellow solid (75.9 mg, 69%), mp 156.8-158.6  $^\circ\text{C}$ ; IR (KBr): 3159, 2934, 1603, 949, 762, 695  $\text{cm}^{-1}$ ;  $^1\text{H}$  NMR (400 MHz,  $\text{CDCl}_3$ )  $\delta$  ppm 12.22 (s, 1H), 7.57 (s, 1H), 7.50-7.43 (m, 2H), 7.34-7.18 (m, 8H);  $^{13}\text{C}$  NMR (100 MHz,  $\text{CDCl}_3$ )  $\delta$  ppm 143.8, 134.7, 133.1, 131.4, 128.5, 128.5, 128.4, 128.3, 128.1, 126.5, 119.8; MS (EI, 70 eV)  $m/z$ : 220.08, 205.06, 165.06, 89.03; HRMS ESI ( $m/z$ ): calcd for  $\text{C}_{15}\text{H}_{13}\text{N}_2$   $[\text{M} + \text{H}]^+$ : 221.1073, found: 221.1076.

### 3-Ethyl-4-phenyl-1H-pyrazole (5o)

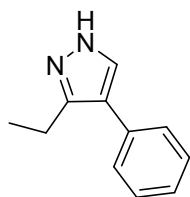

Light yellow solid (64.5 mg, 75%), mp 71.2-73.4  $^\circ\text{C}$ ; IR (KBr): 3170, 2966, 1762, 1243, 768, 698  $\text{cm}^{-1}$ ;  $^1\text{H}$  NMR (400 MHz,  $\text{CDCl}_3$ )  $\delta$  ppm 11.59 (s, 1H), 7.59 (d,  $J = 7.5$  Hz, 2H), 7.42 (t,  $J = 7.4$  Hz, 3H), 7.35 (t,  $J = 7.2$  Hz, 1H), 2.67 (q,  $J = 7.4$  Hz, 2H), 1.23 (t,  $J = 7.5$  Hz, 3H);  $^{13}\text{C}$  NMR (100 MHz,  $\text{CDCl}_3$ )  $\delta$  ppm 144.5, 133.5, 132.3, 128.5, 127.6, 127.6, 120.1, 17.5, 15.0; MS (EI, 70 eV)  $m/z$ : 172.08, 157.04, 130.07, 103.06; HRMS ESI ( $m/z$ ): calcd for  $\text{C}_{11}\text{H}_{13}\text{N}_2$   $[\text{M} + \text{H}]^+$ : 173.1073, found: 173.1074.

### 4-Phenyl-3-propyl-1H-pyrazole (5p)

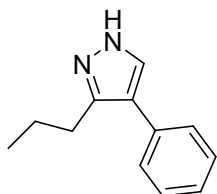

Light yellow solid (67.0 mg, 72%), 101.9-103.6 °C; IR (KBr): 3161, 2927, 1762, 1445, 768, 697  $\text{cm}^{-1}$ ;  $^1\text{H}$  NMR (400 MHz,  $\text{CDCl}_3$ )  $\delta$  ppm 11.30 (s, 1H), 7.58 (d,  $J = 7.3$  Hz, 2H), 7.39 (tt,  $J = 14.5, 7.2$  Hz, 4H), 2.67-2.59 (m, 2H), 1.63 (dd,  $J = 15.1, 7.5$  Hz, 2H), 0.97 (t,  $J = 7.3$  Hz, 3H).;  $^{13}\text{C}$  NMR (100 MHz,  $\text{CDCl}_3$ )  $\delta$  ppm 144.6, 134.1, 132.3, 128.5, 127.7, 127.6, 118.3, 26.3, 23.8, 14.0; MS (EI, 70 eV)  $m/z$ : 186.10, 157.07, 130.07, 103.09; HRMS ESI ( $m/z$ ): calcd for  $\text{C}_{12}\text{H}_{15}\text{N}_2$  [ $\text{M} + \text{H}$ ] $^+$ : 187.1230, found: 187.1231.

### 3a and [D<sub>2</sub>]-3a

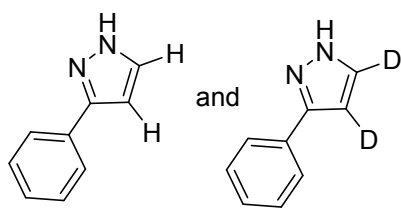

Yellow oil (54.8 mg, 75%); IR (KBr): 3170, 2936, 1454, 767, 692  $\text{cm}^{-1}$ ;  $^1\text{H}$  NMR (400 MHz,  $\text{CDCl}_3$ )  $\delta$  ppm 9.20 (s, 1H), 7.77 (d,  $J = 7.2$  Hz, 2H), 7.61 (s, 0.18H), 7.40 (t,  $J = 7.4$  Hz, 2H), 7.36-7.31 (m, 1H), 6.61 (s, 0.18H);  $^{13}\text{C}$  NMR (100 MHz,  $\text{CDCl}_3$ )  $\delta$  ppm 148.9, 133.2, 132.0, 128.7, 128.0, 125.8, 102.5; MS (EI, 70 eV)  $m/z$ : 146.09, 117.10, 91.09, 77.07; HRMS ESI ( $m/z$ ): calcd for  $\text{C}_9\text{H}_7\text{D}_2\text{N}_2$  [ $\text{M} + \text{H}$ ] $^+$ : 147.0886, found: 147.0889.

### 5a and [D<sub>2</sub>]-5a

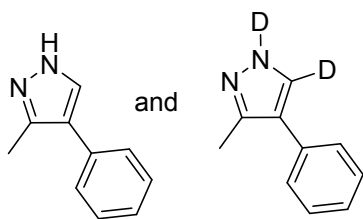

Brown oil (64.0 mg, 80%); IR (KBr): 3199, 2930, 1601, 1441, 764, 698  $\text{cm}^{-1}$ ;  $^1\text{H}$  NMR (400 MHz,  $\text{CDCl}_3$ )  $\delta$  ppm 7.61 (s, 0.12H), 7.31 (dt,  $J = 16.0, 7.5$  Hz, 5.16H), 1.72 (s, 3H);  $^{13}\text{C}$  NMR (100 MHz,  $\text{CDCl}_3$ )  $\delta$  ppm 145.9, 142.6, 135.5, 128.7, 128.0, 126.4, 98.4, 21.6; MS (EI, 70 eV)  $m/z$ : 160.11, 131.11, 117.09, 77.07; HRMS ESI ( $m/z$ ): calcd for  $\text{C}_{10}\text{H}_9\text{D}_2\text{N}_2$  [ $\text{M} + \text{H}$ ] $^+$ : 161.1042, found: 161.1041.

## F. NMR Spectra

3a

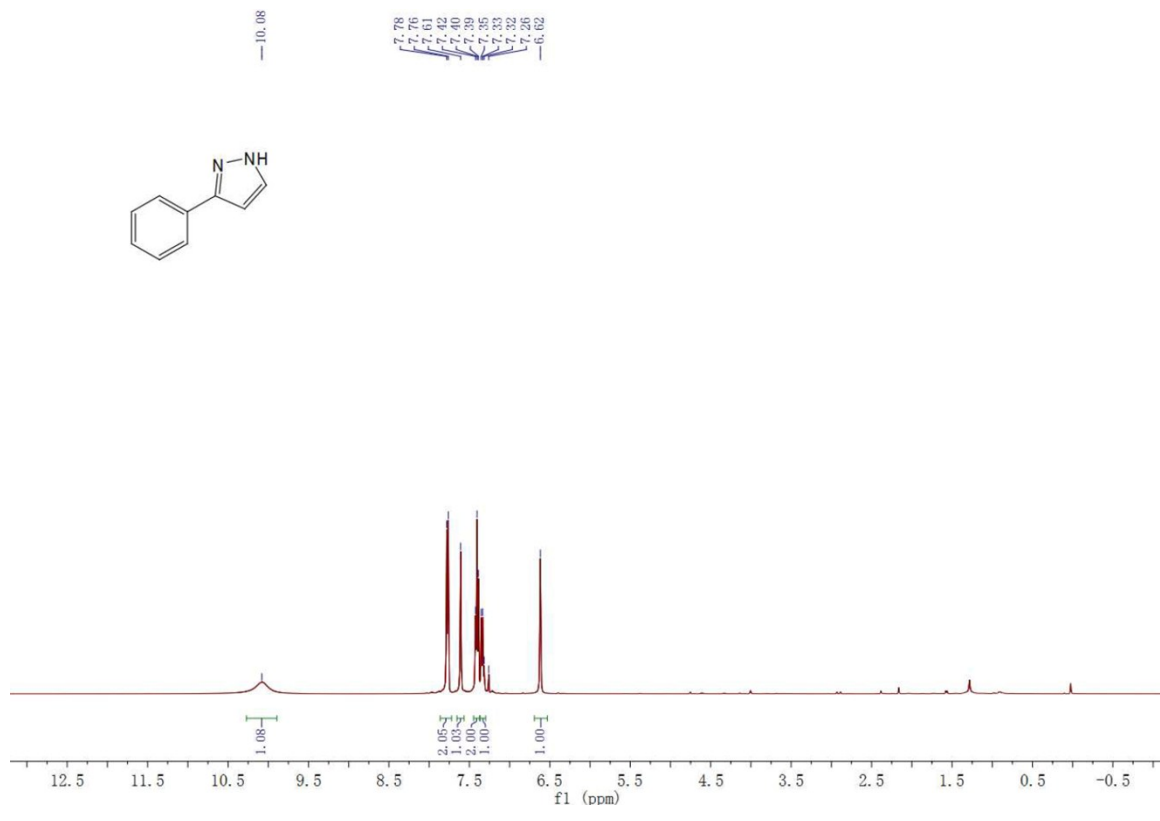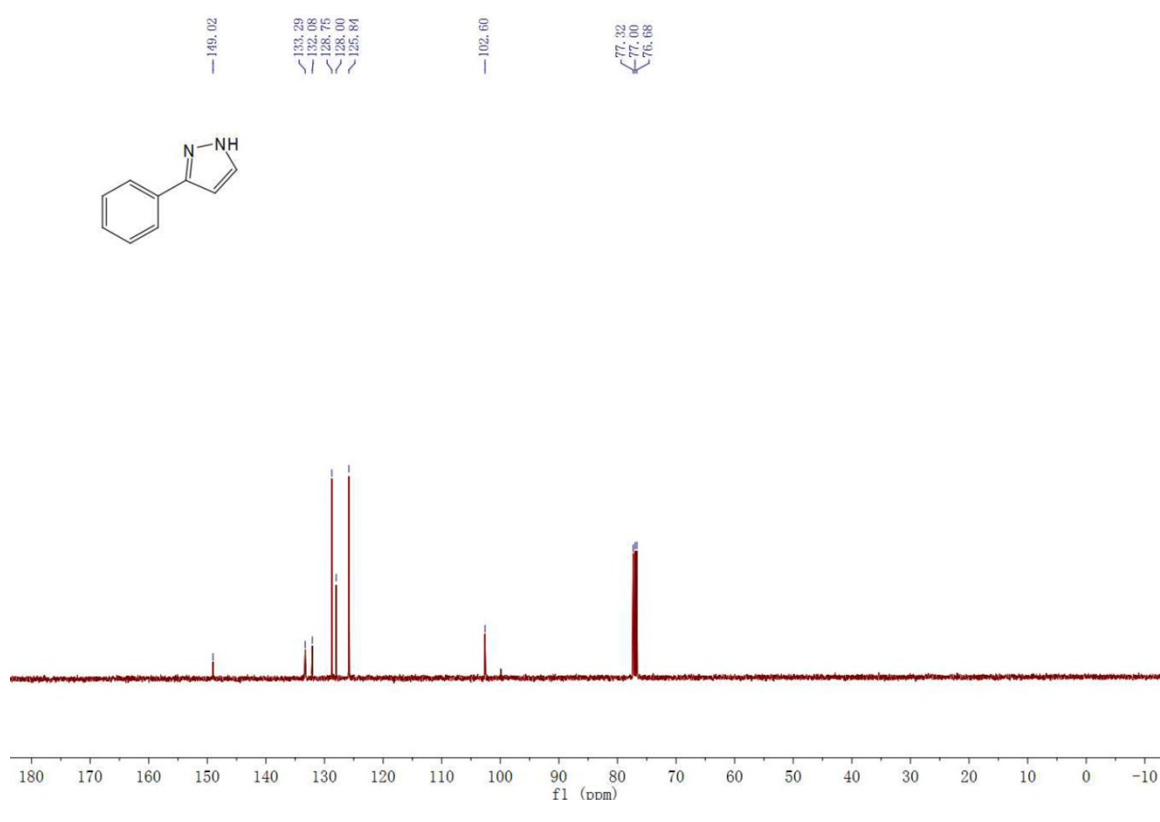

**3b**

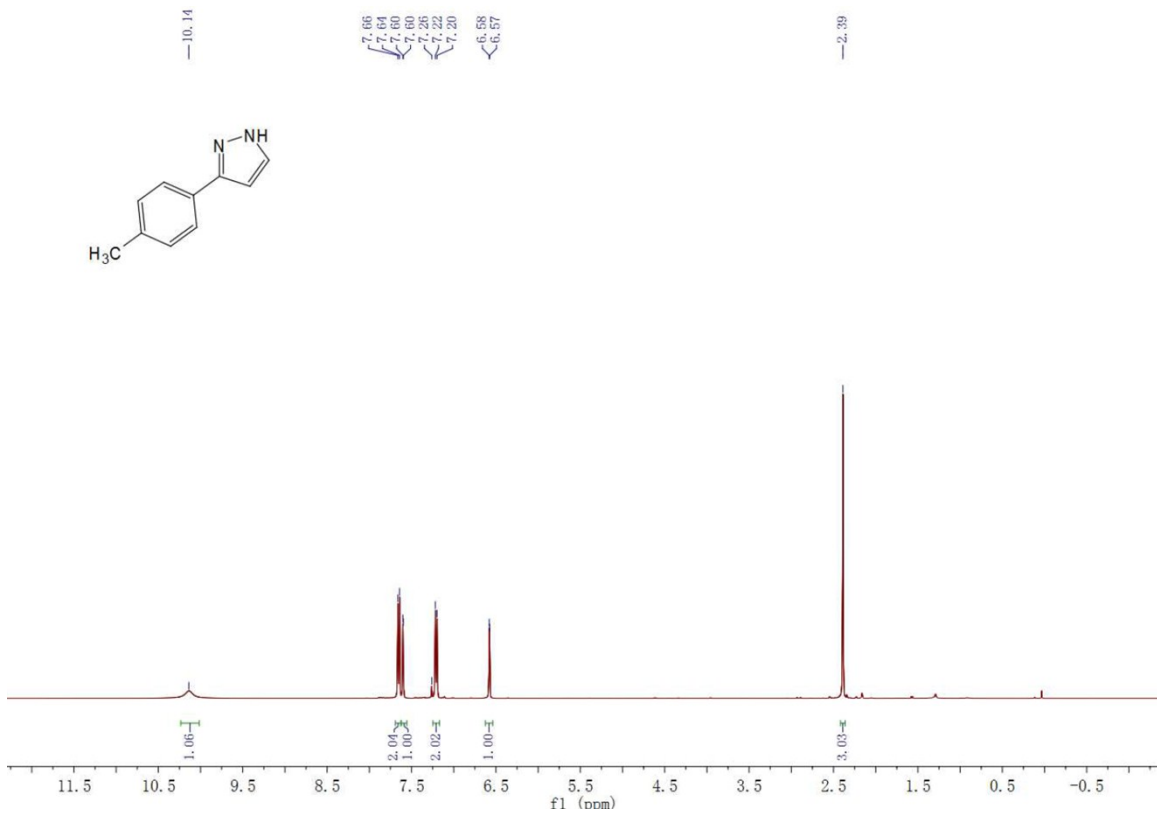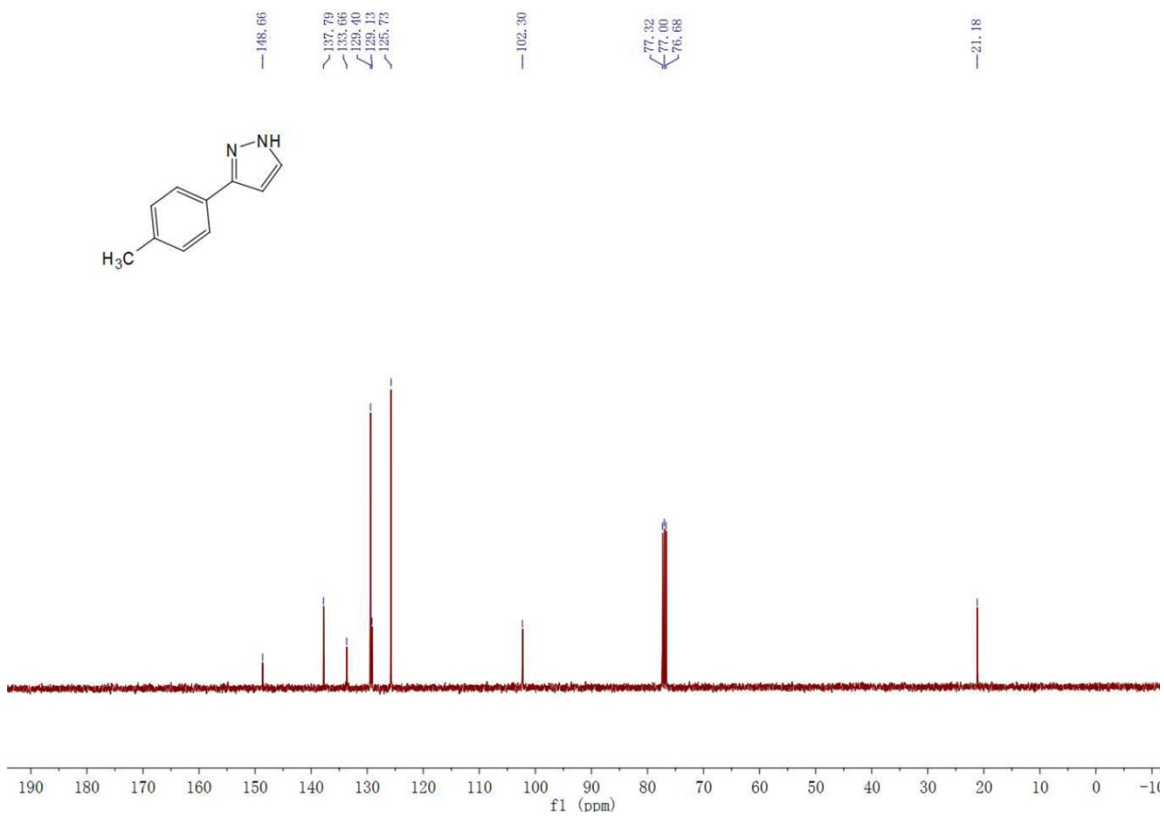

3c

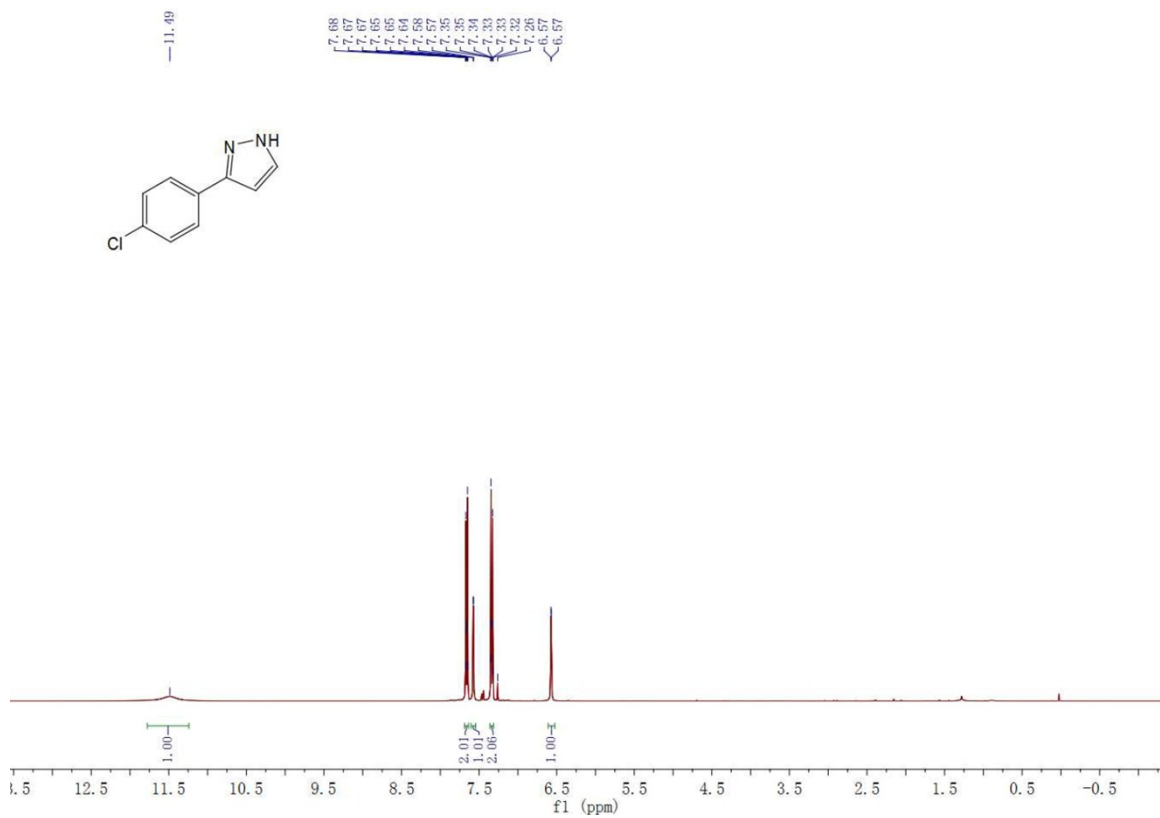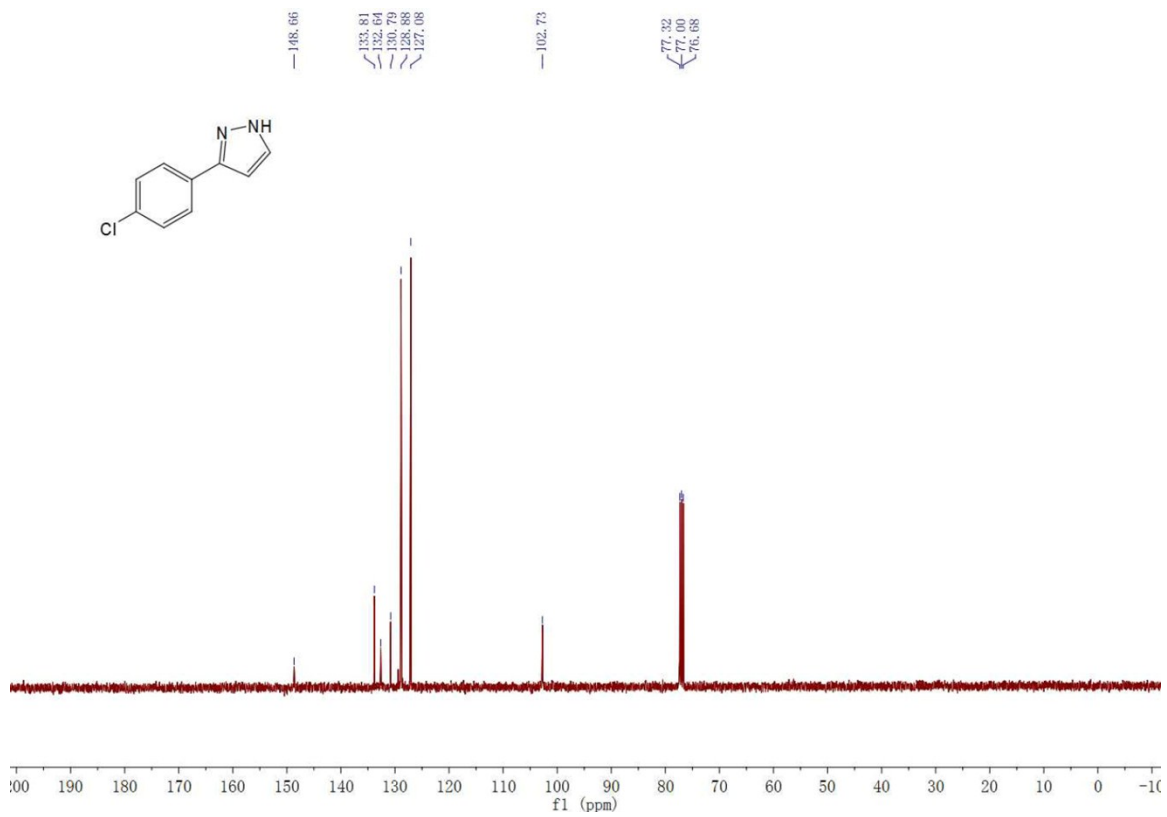

**3d**

S15

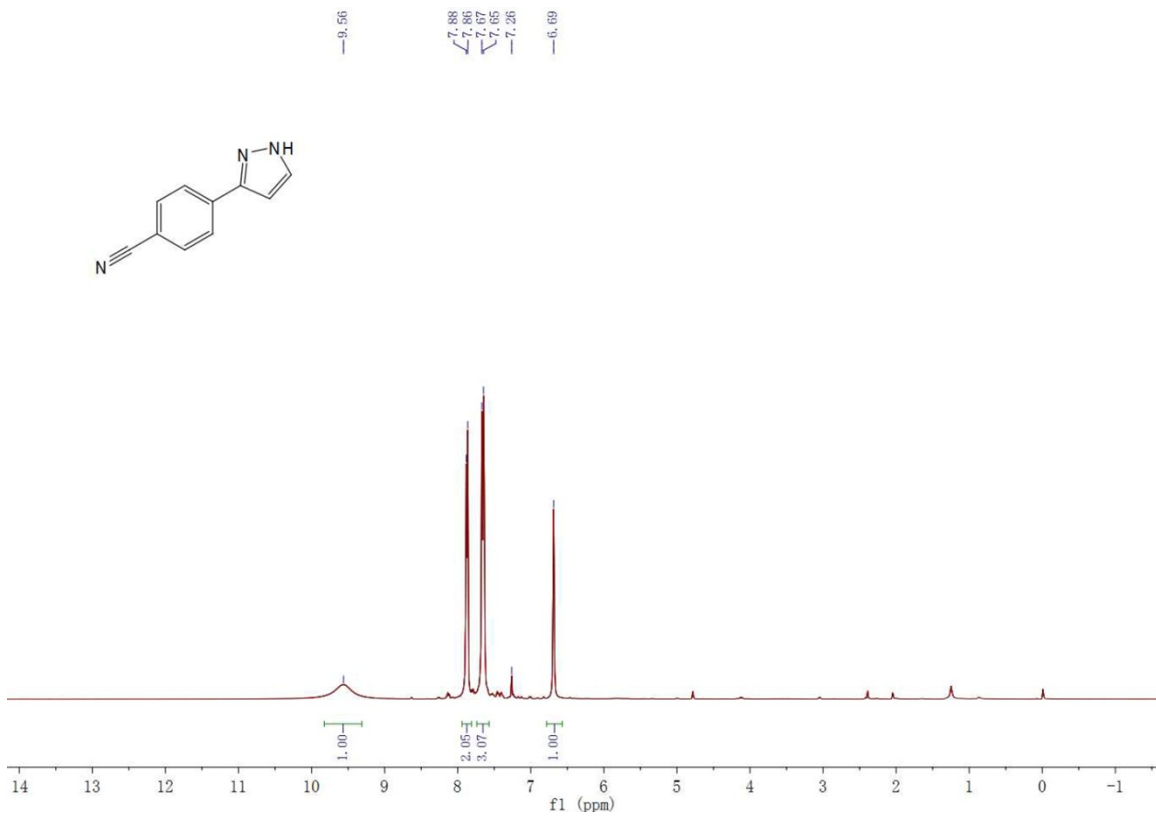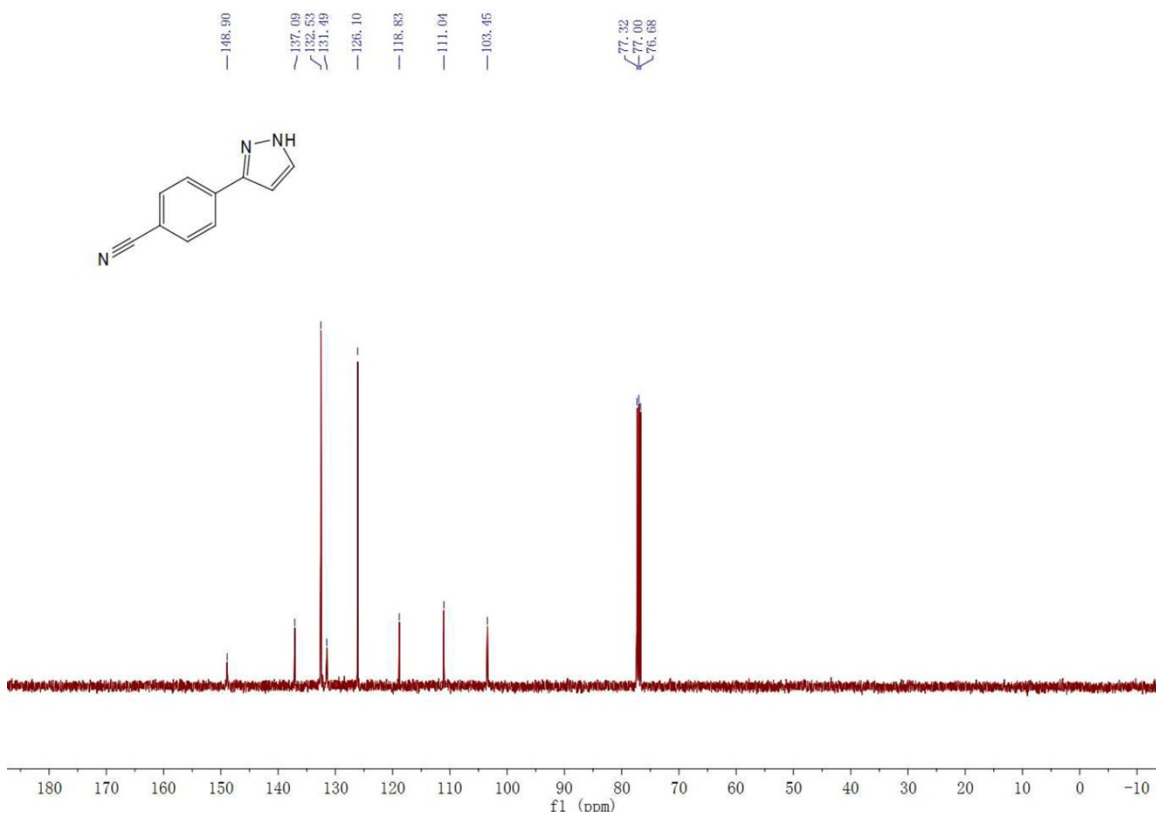

3e



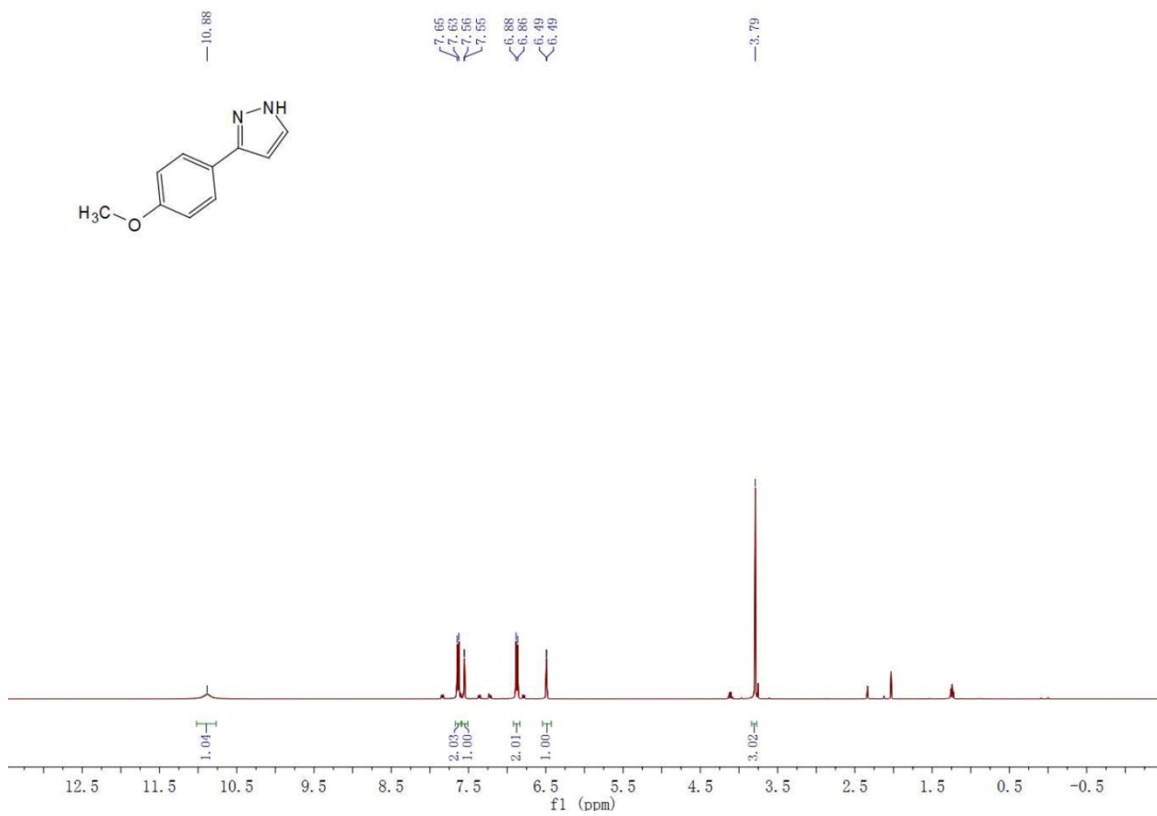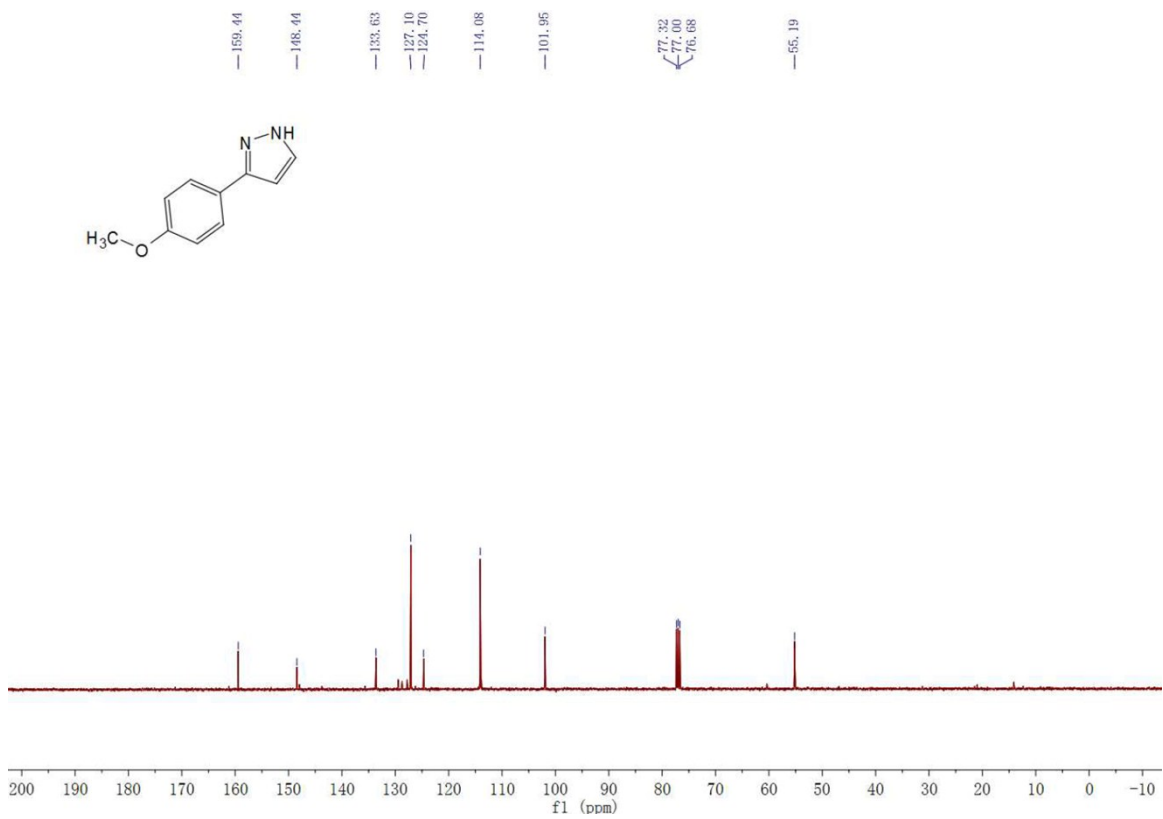

**3f**

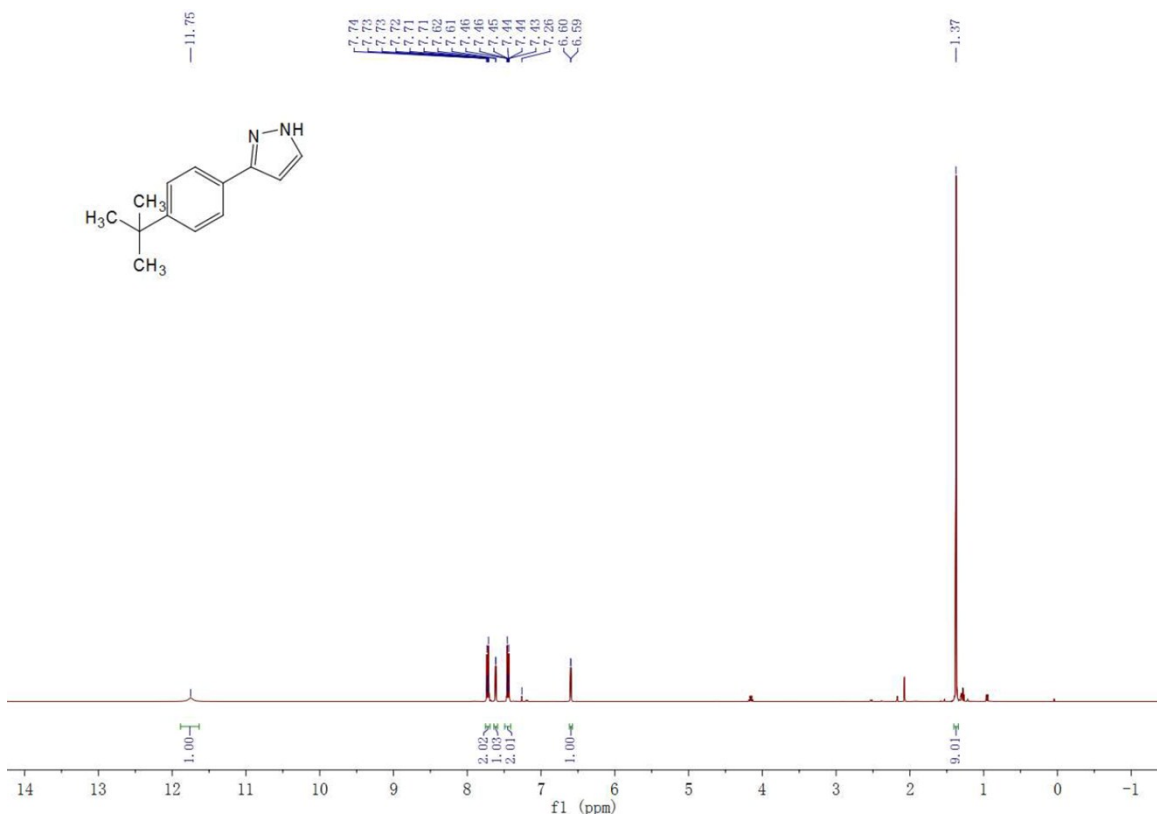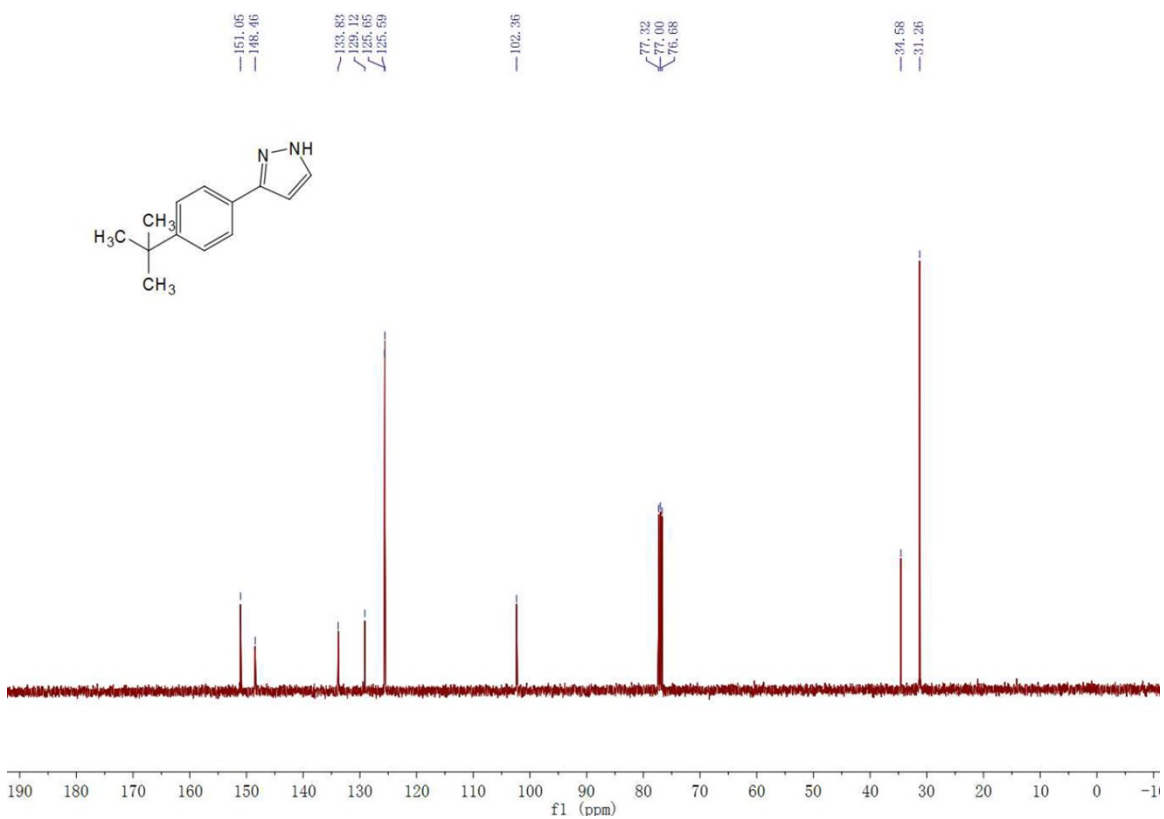

**3g**

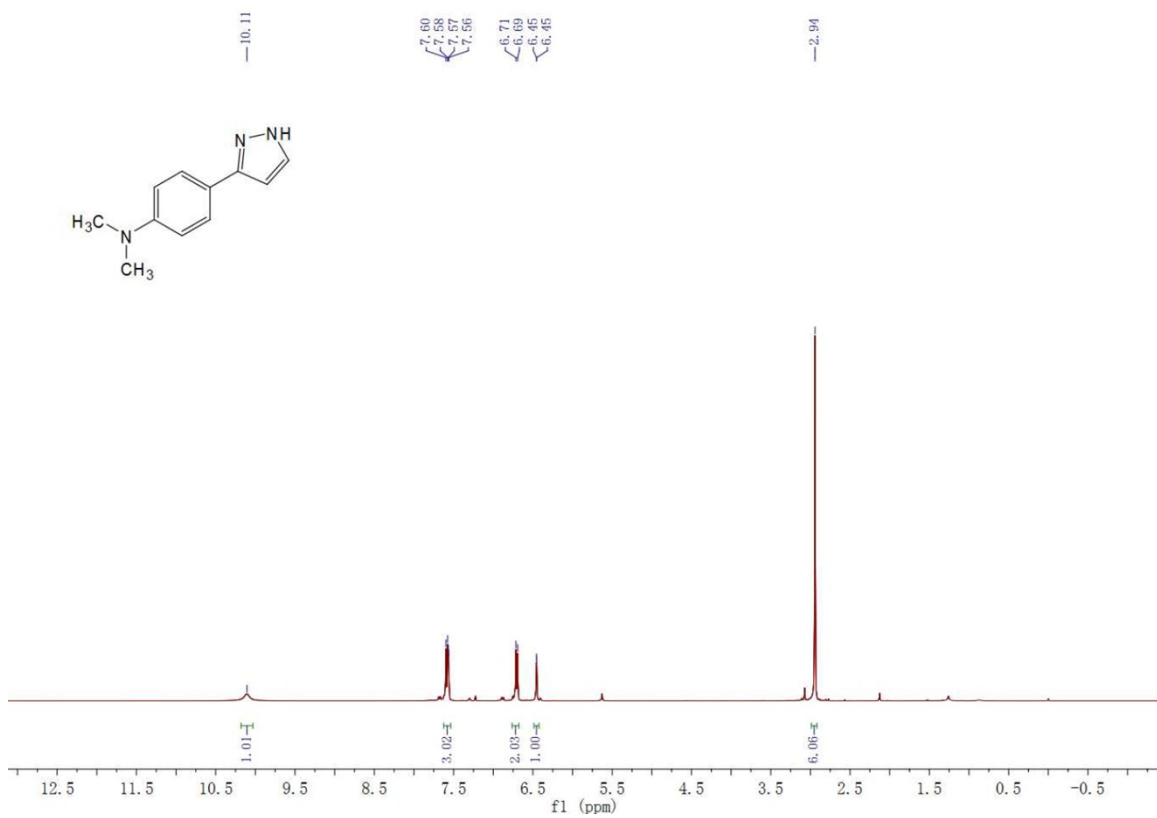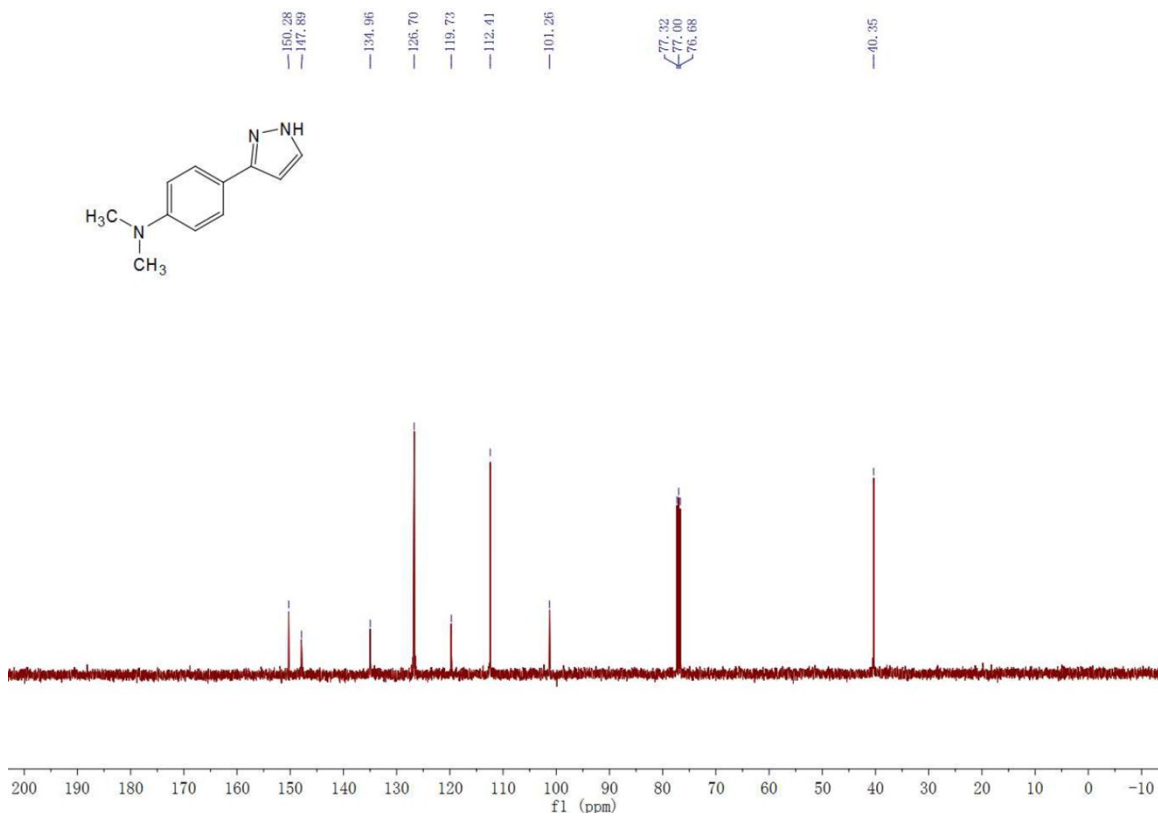

**3h**

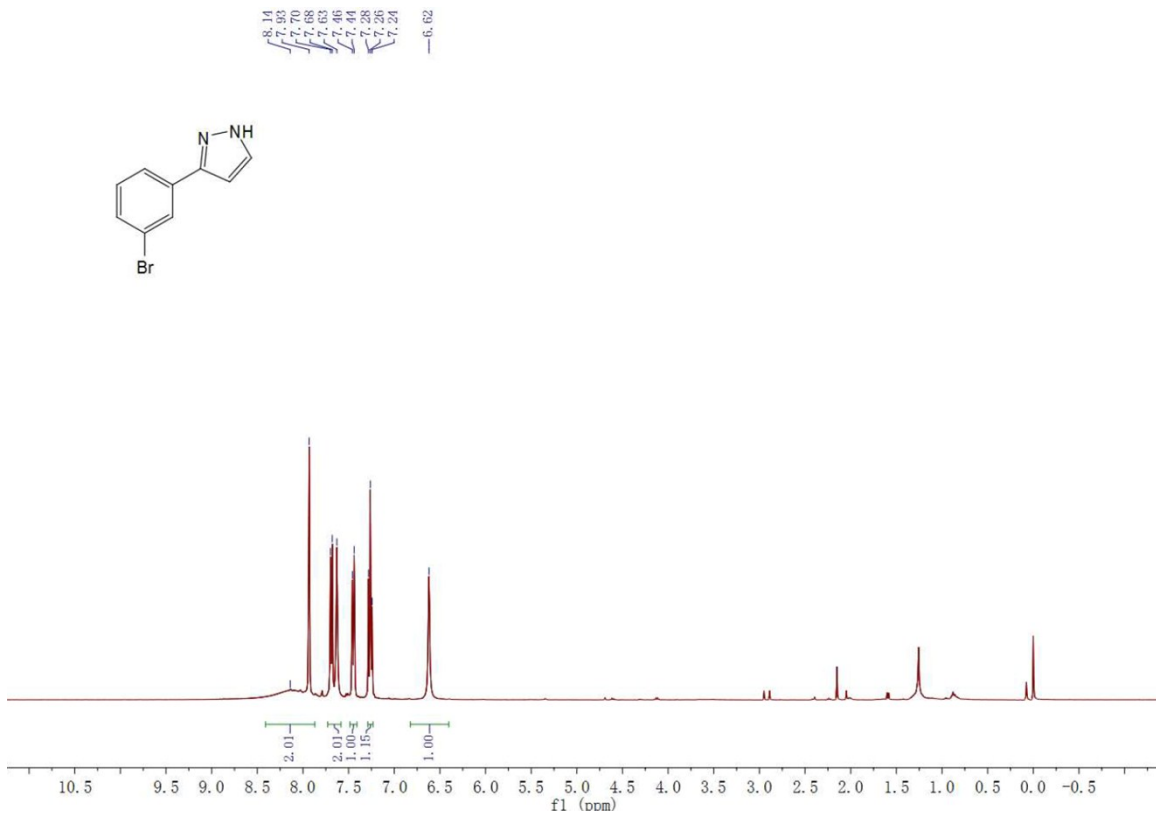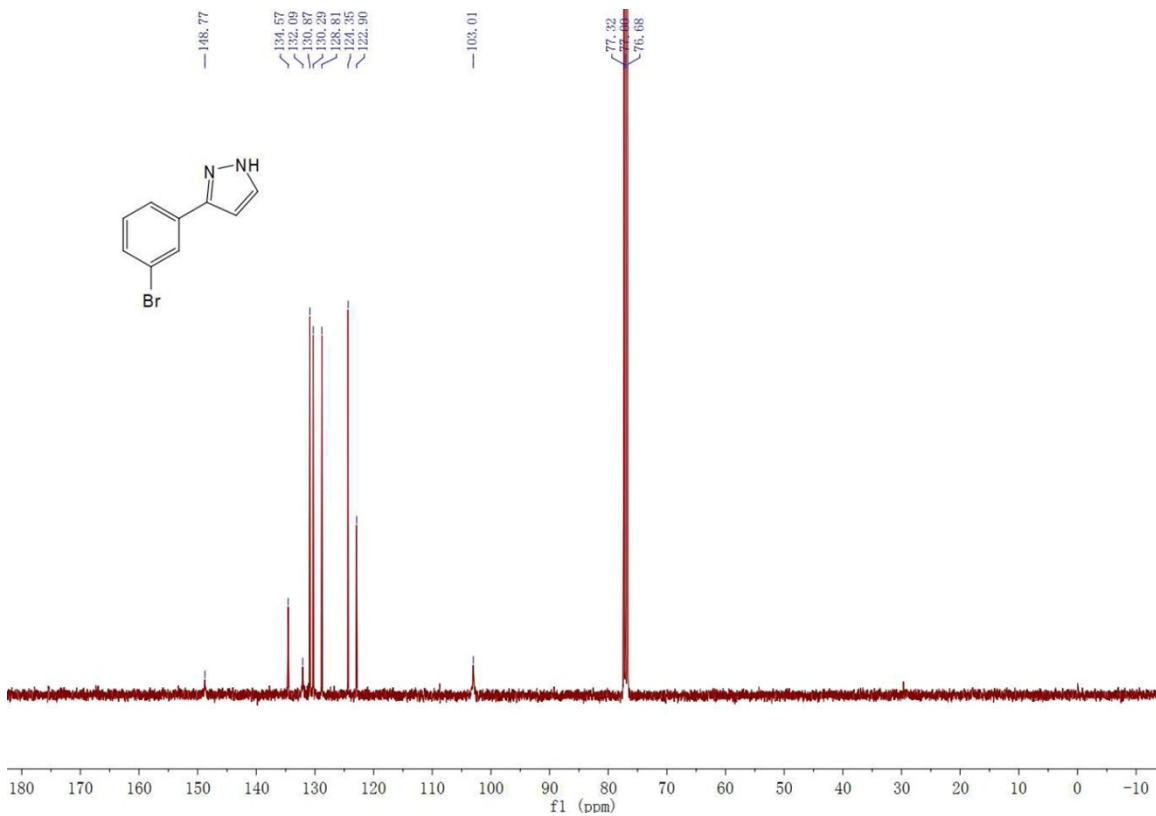

3i

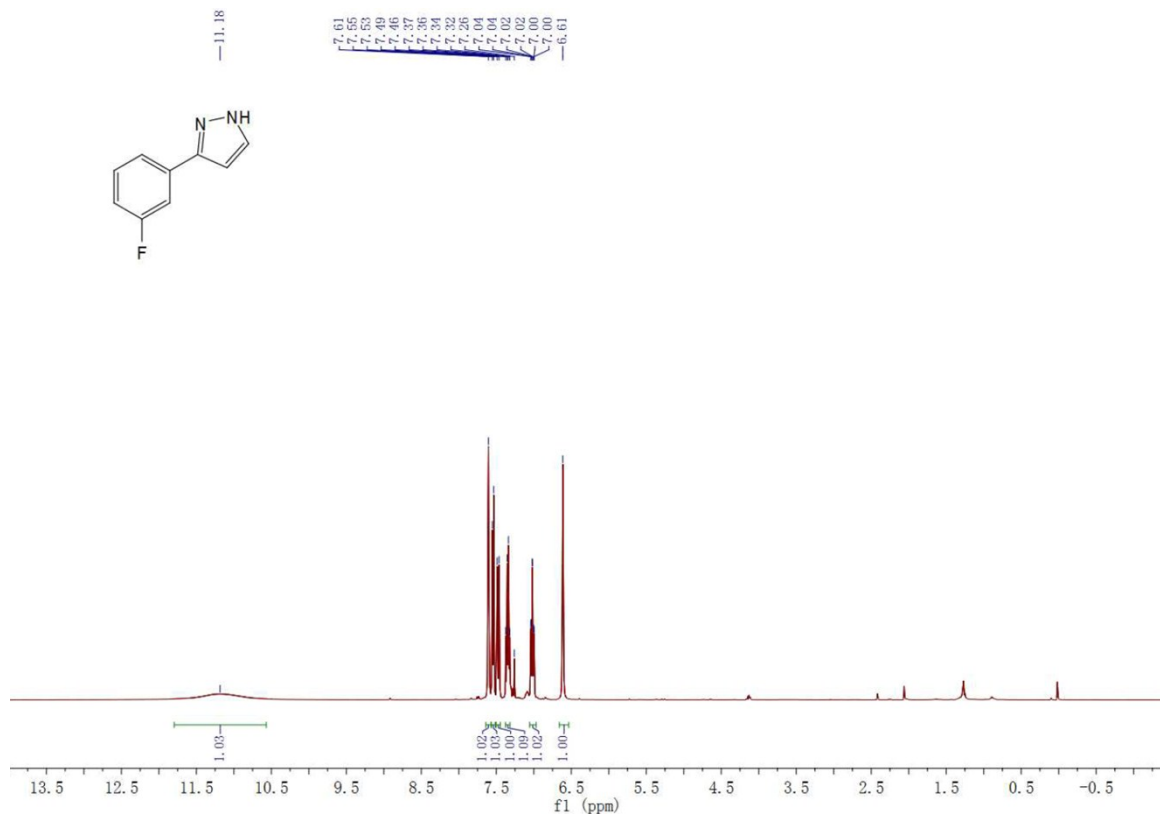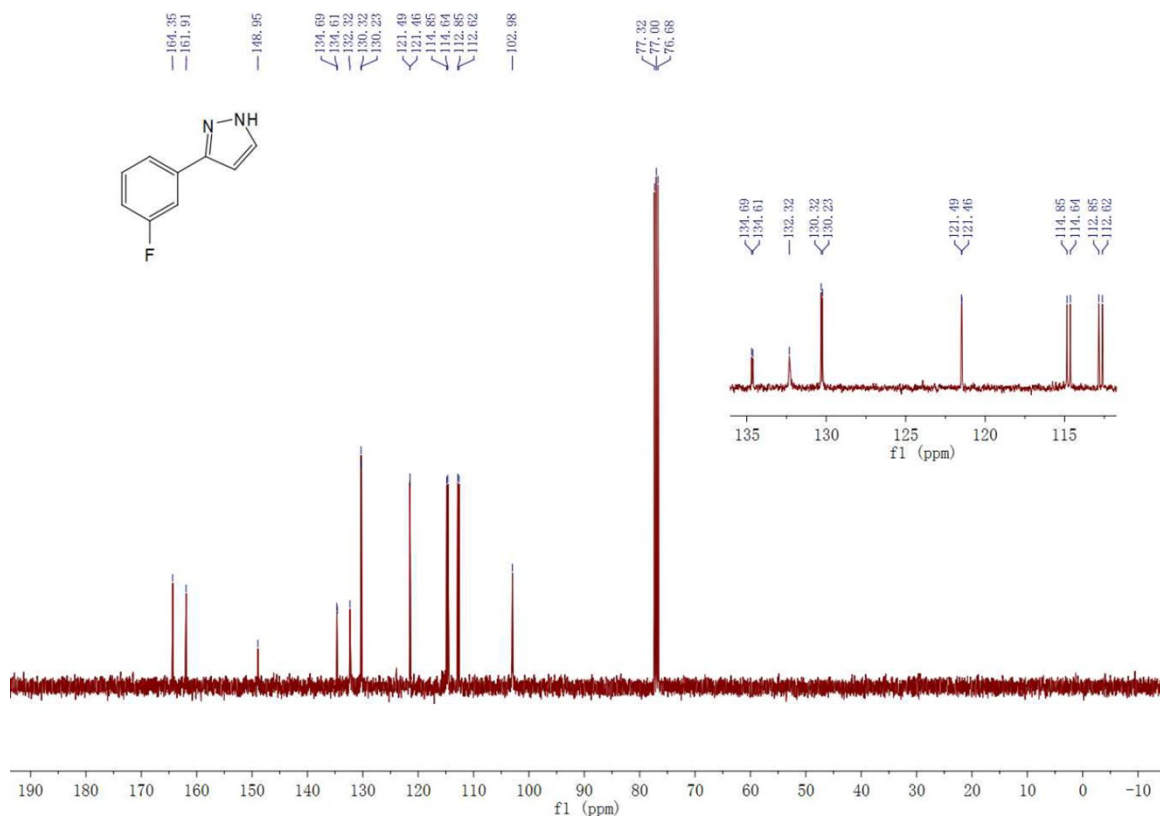

3j

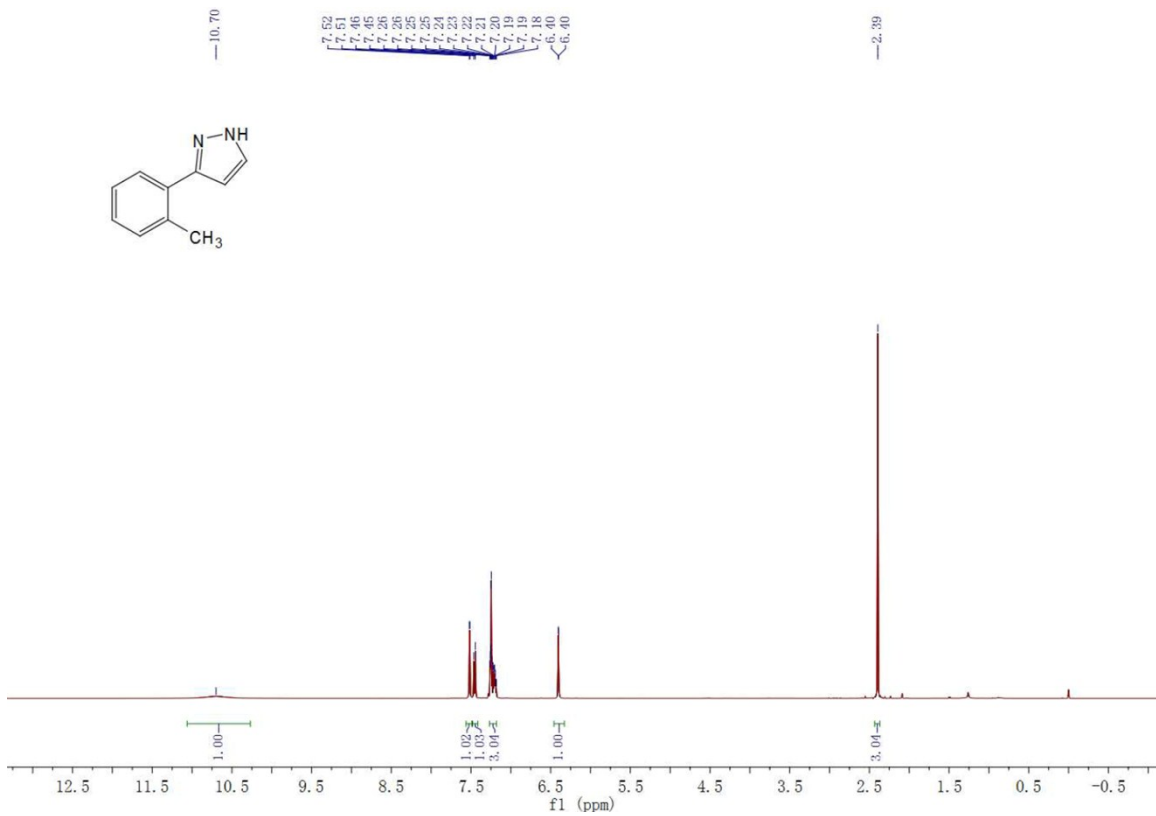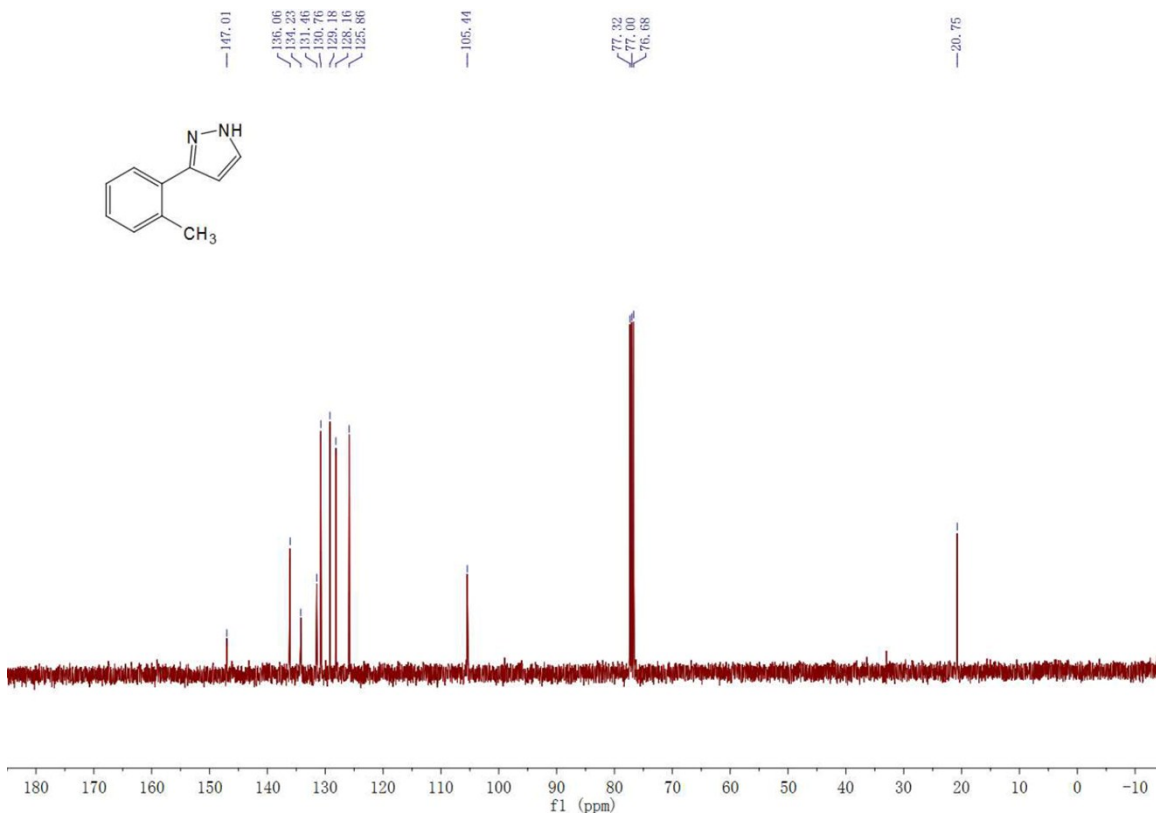

**3k**

S22

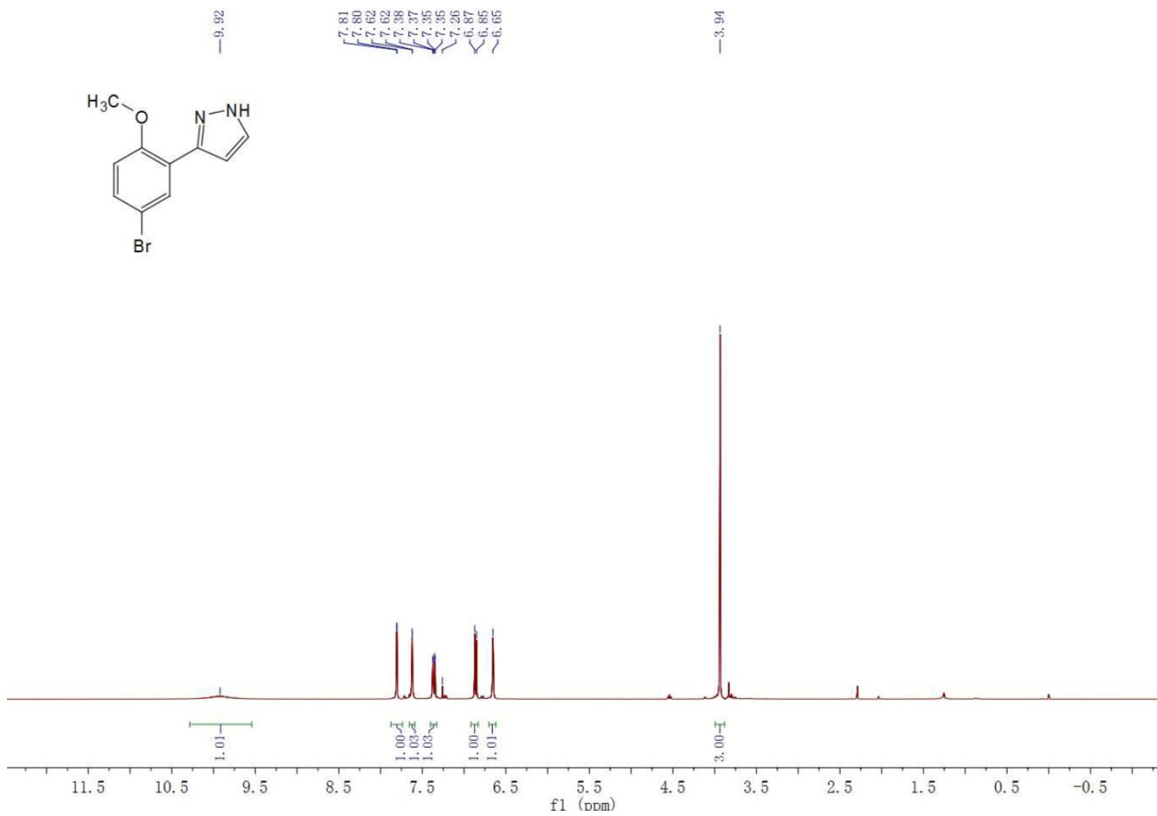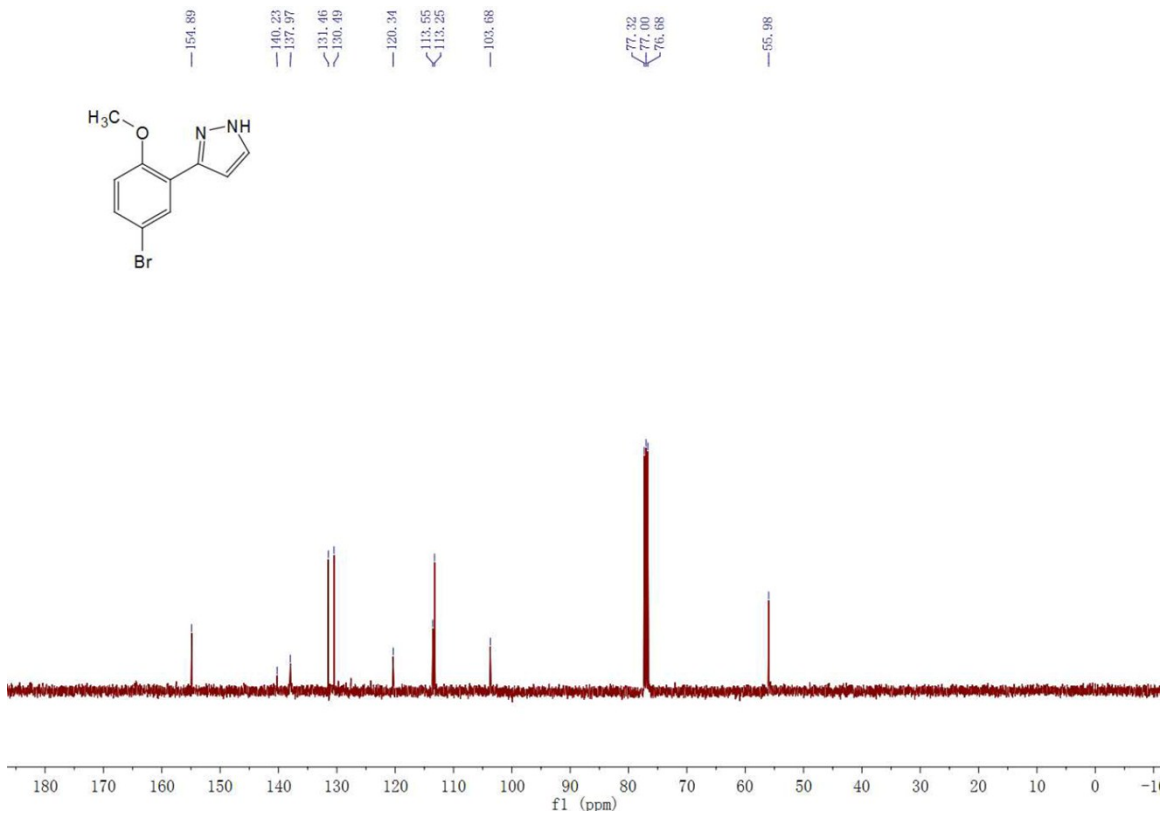

31

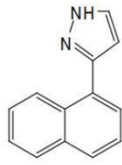

—11.95

8.28  
8.25  
8.25  
7.54  
7.53  
7.52  
7.52  
7.52  
7.28  
7.28  
6.68

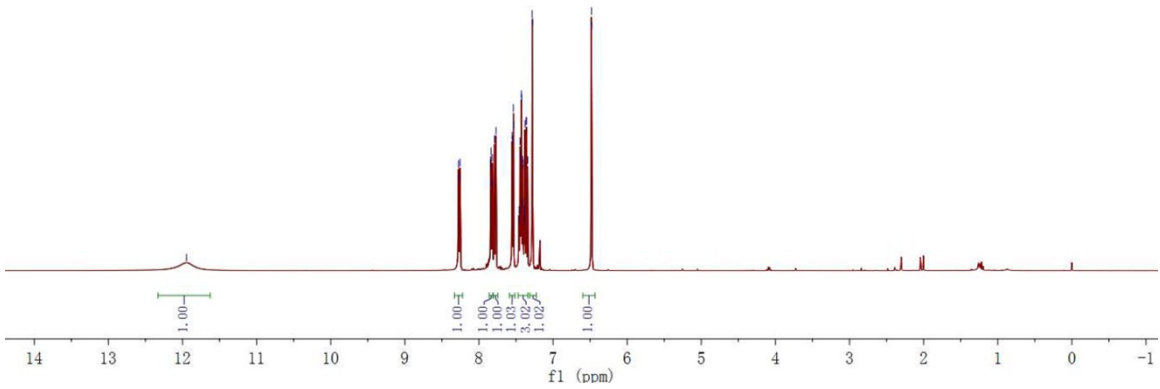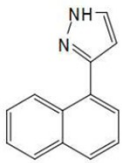

147.52  
133.76  
132.71  
131.38  
130.30  
128.51  
127.68  
126.36  
125.86  
125.73  
125.16  
106.03  
77.32  
77.00  
76.68

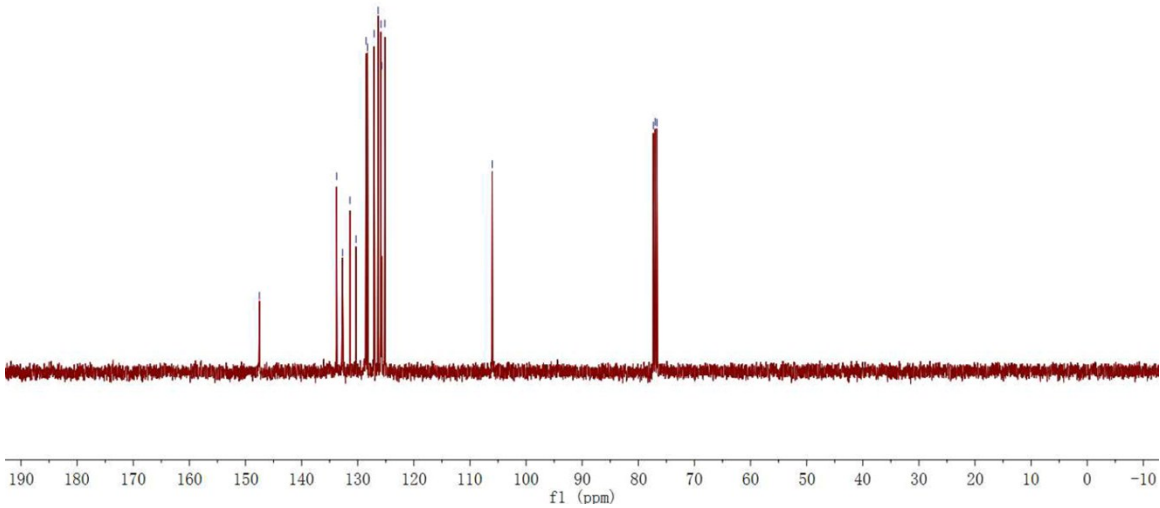

**3m**



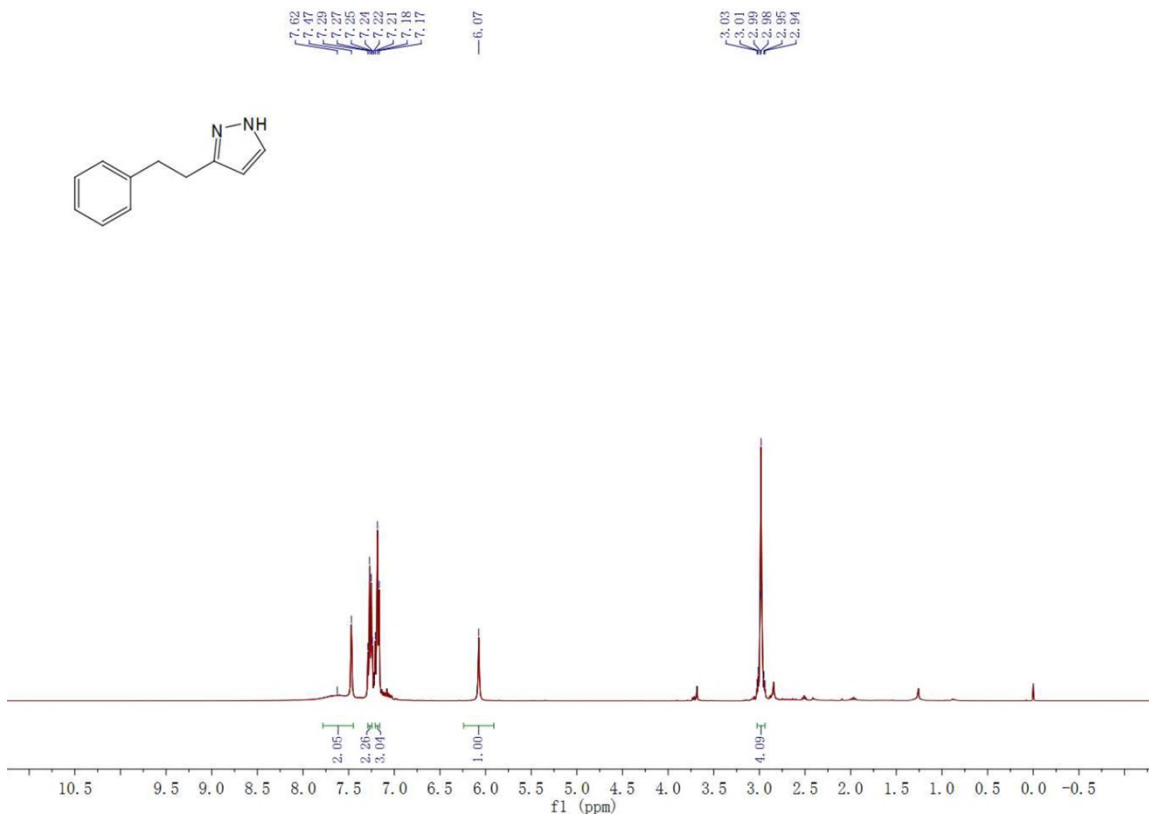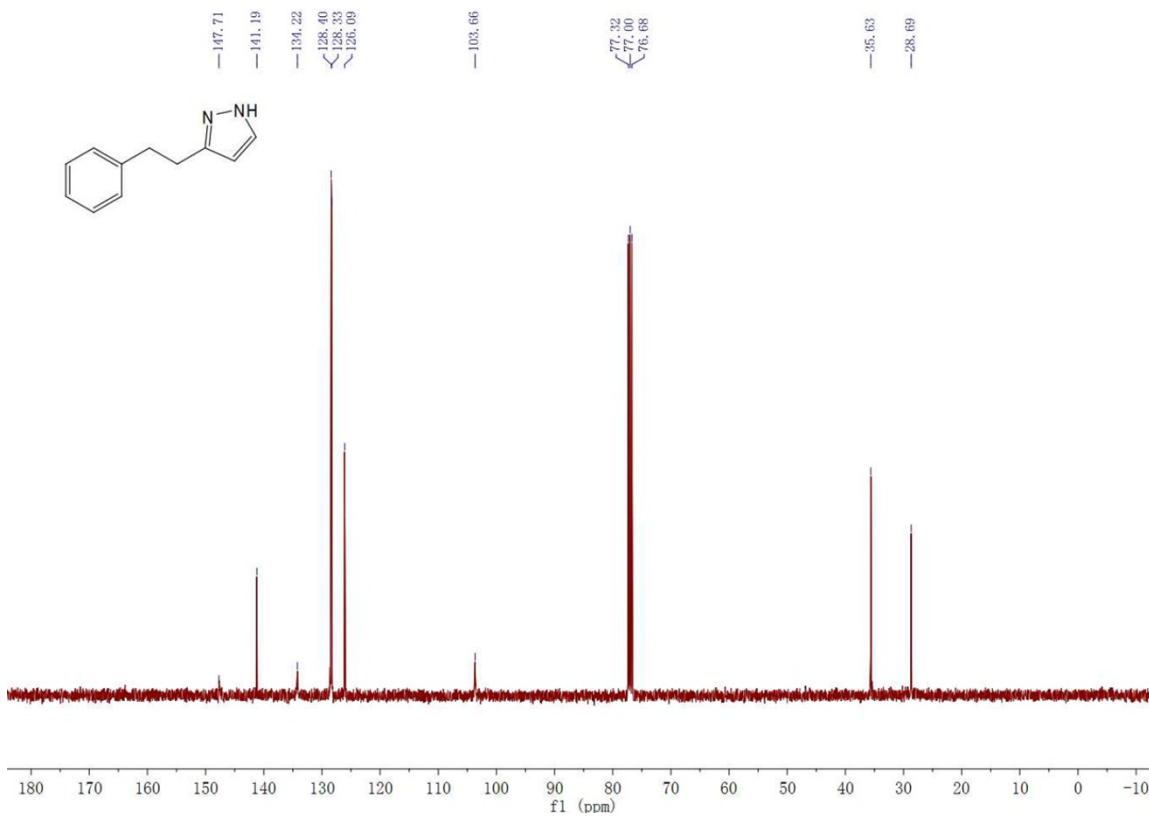

**3n**

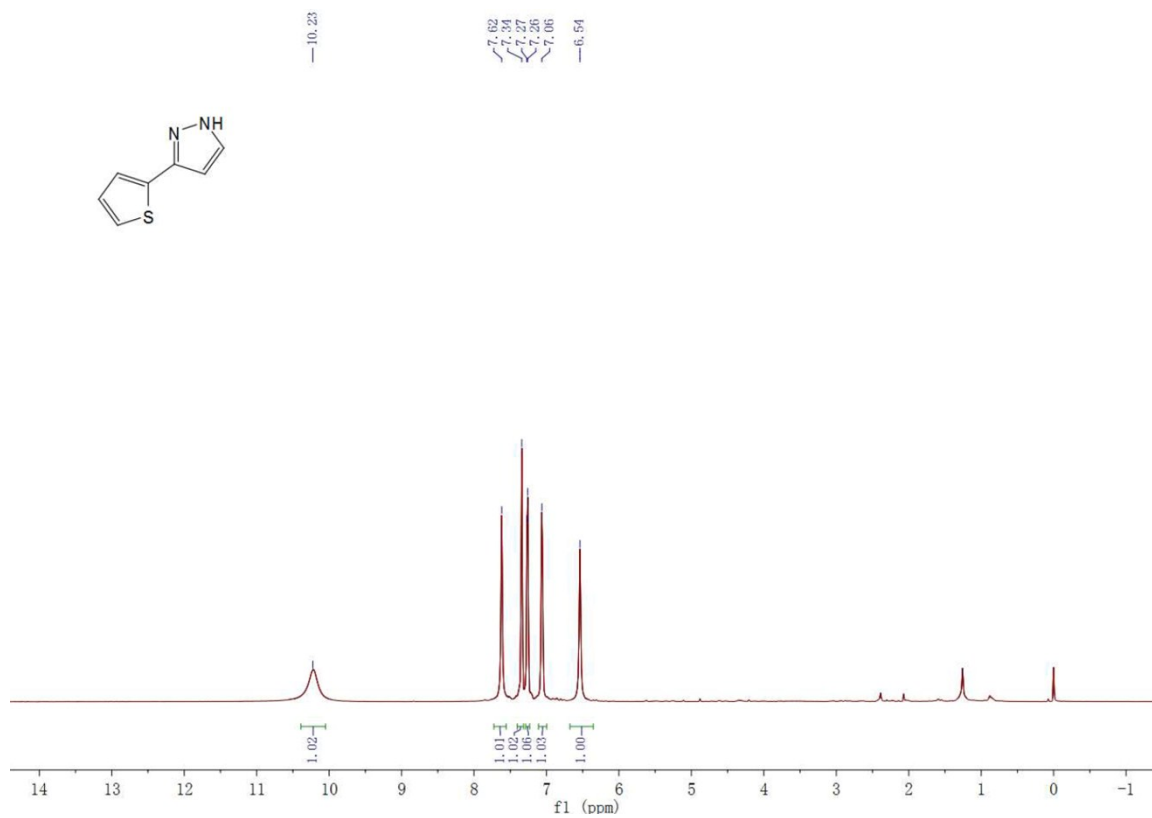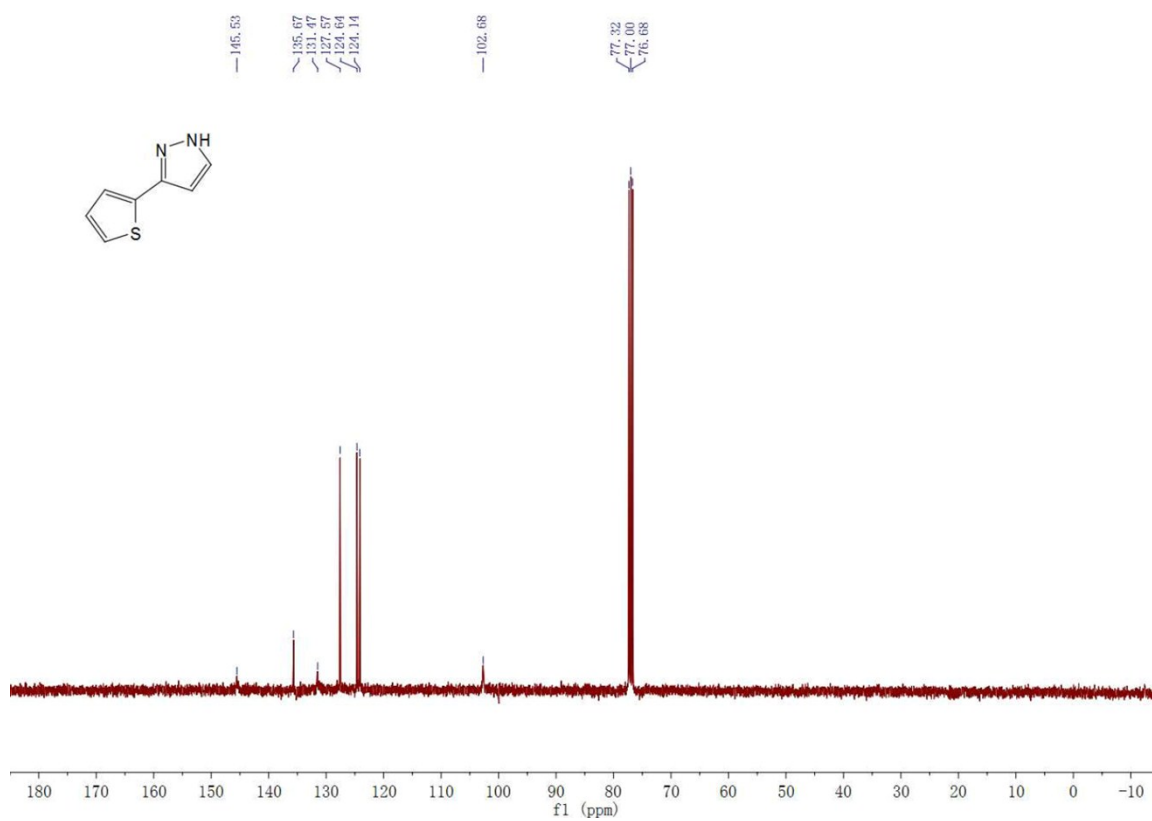

30

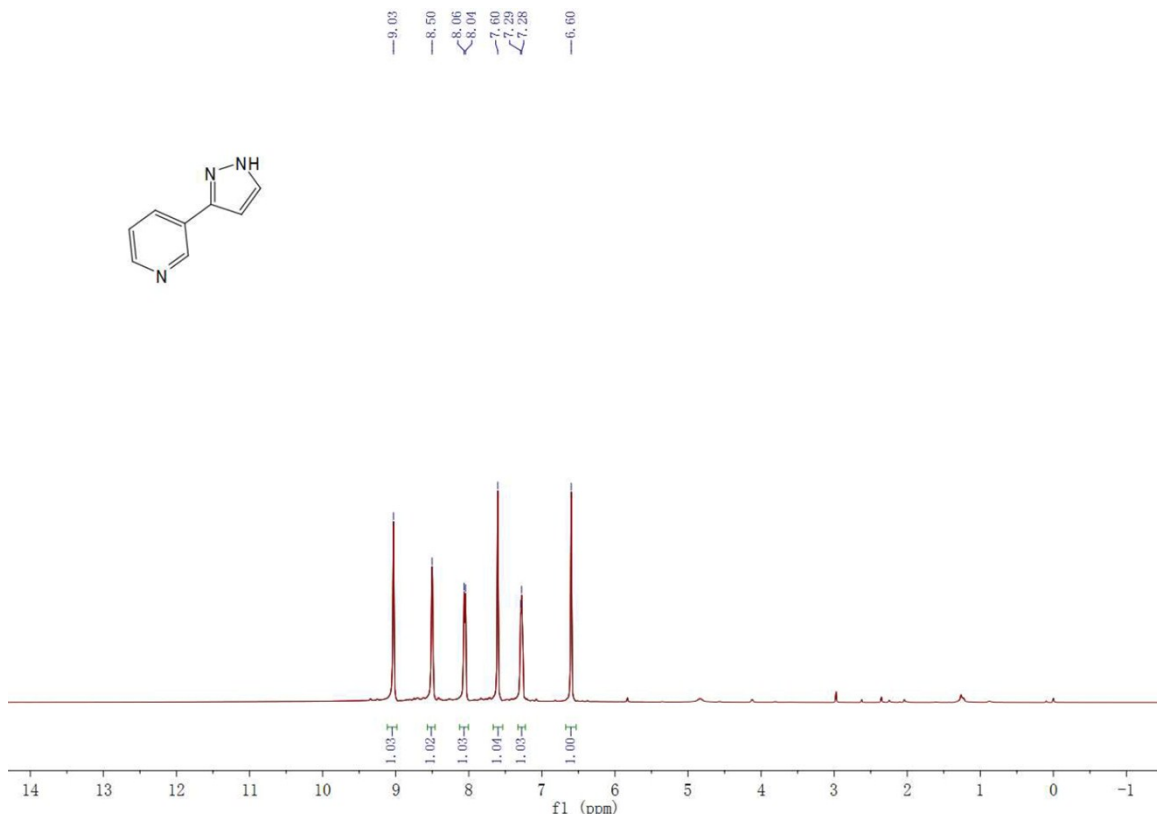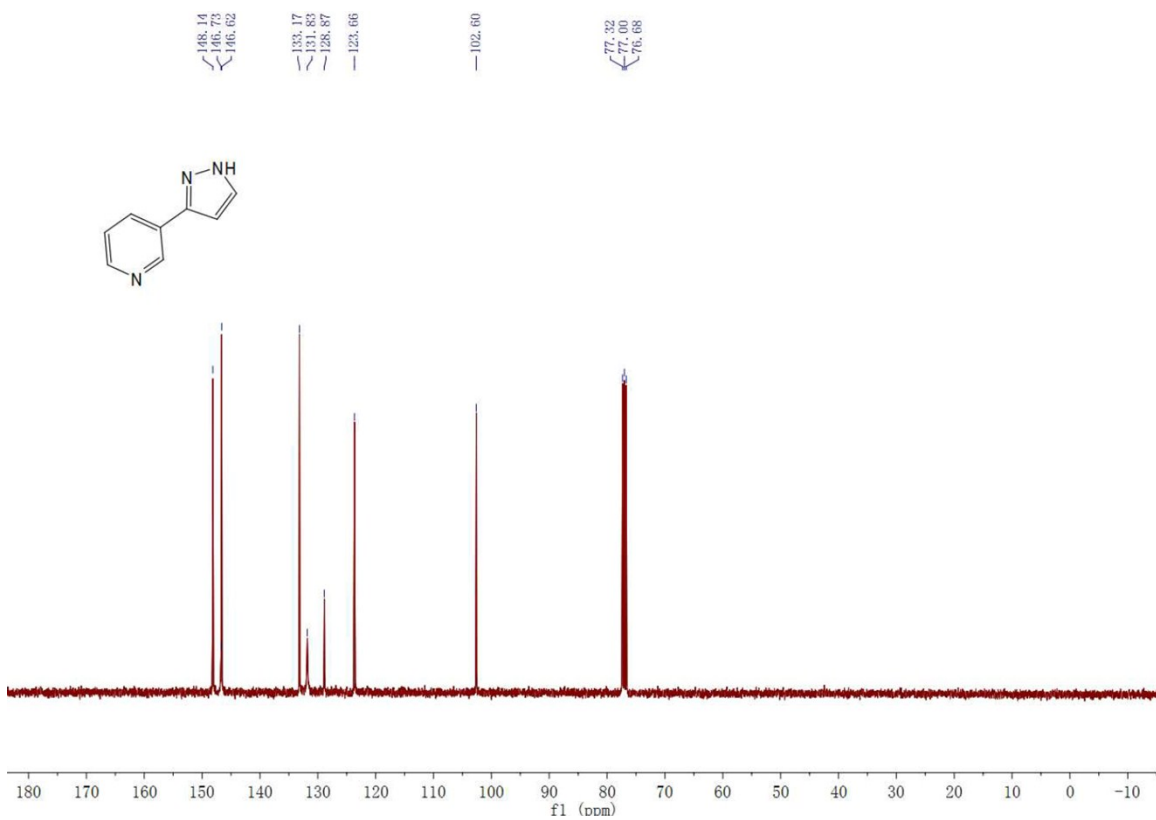

5a

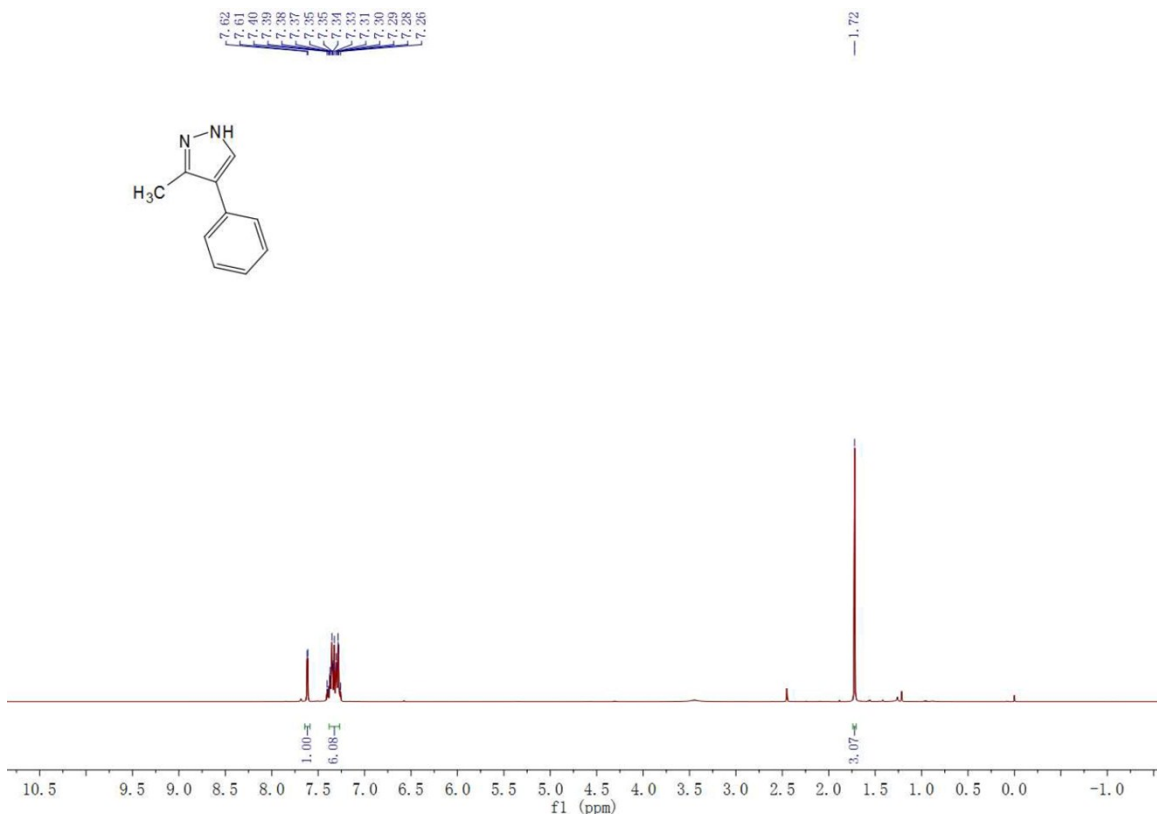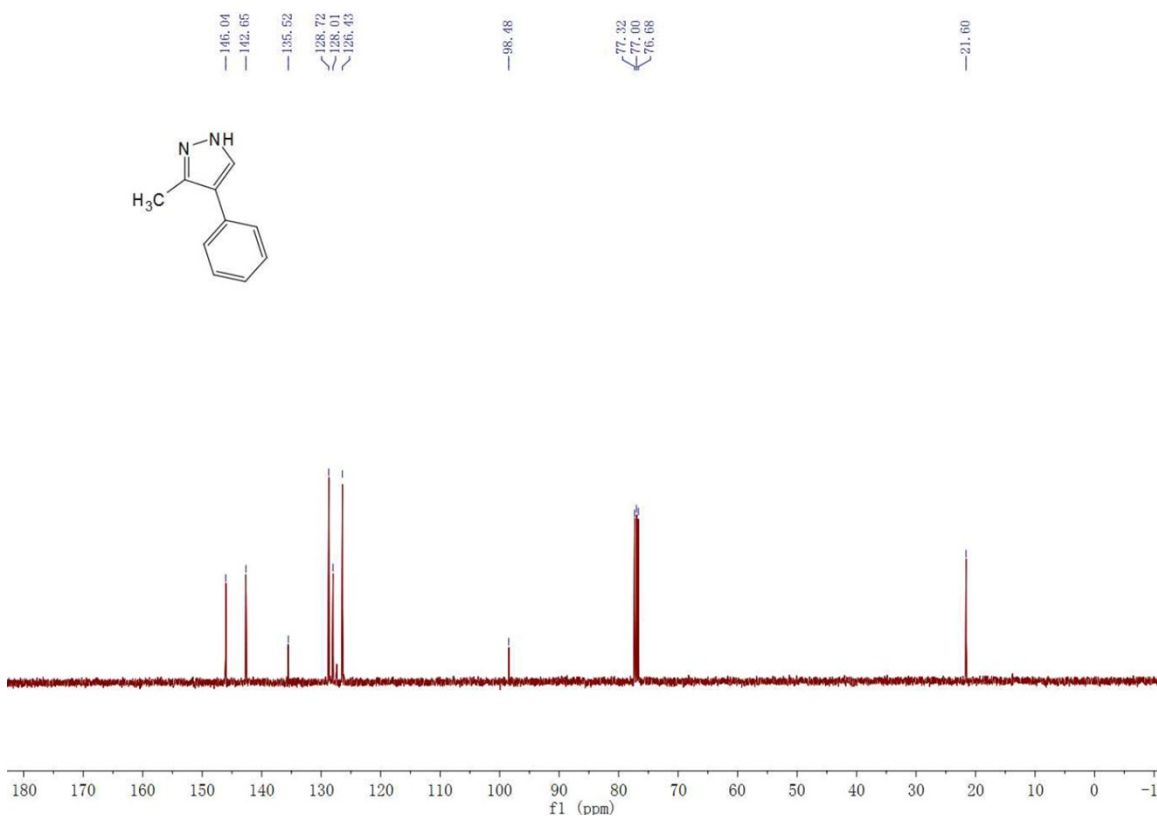

5b

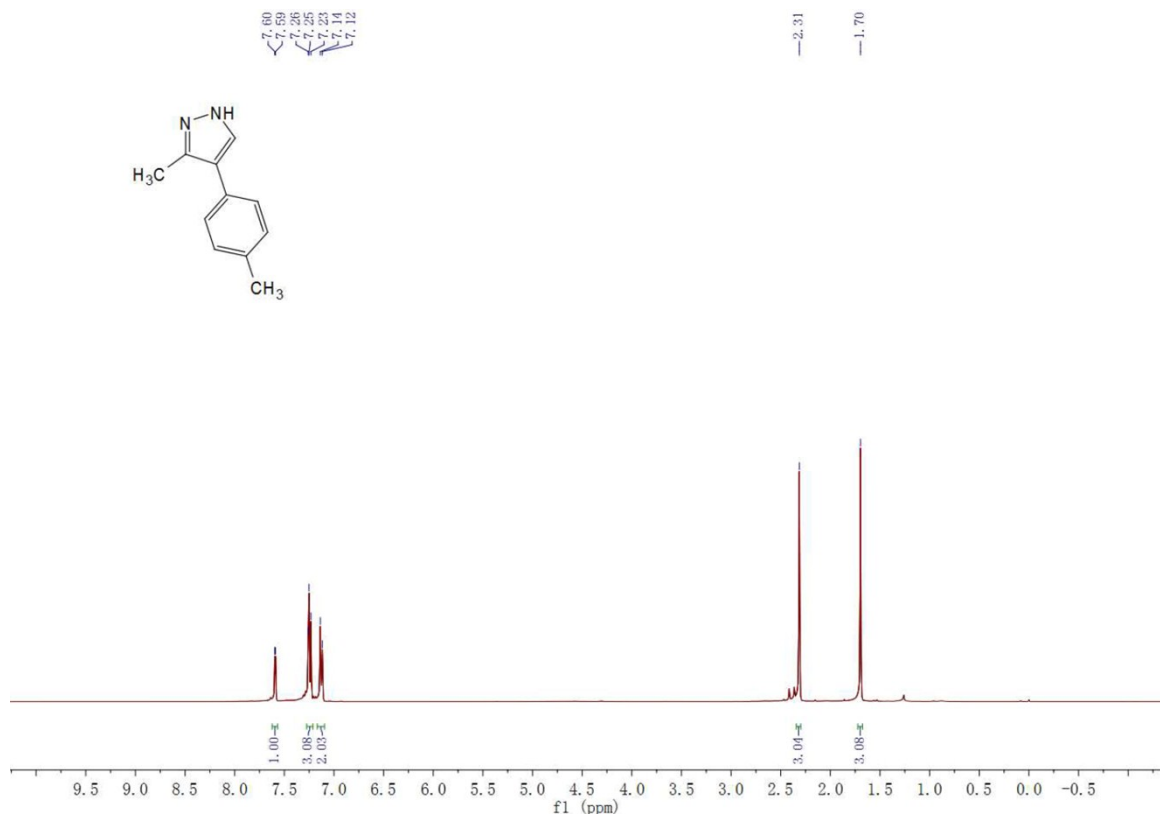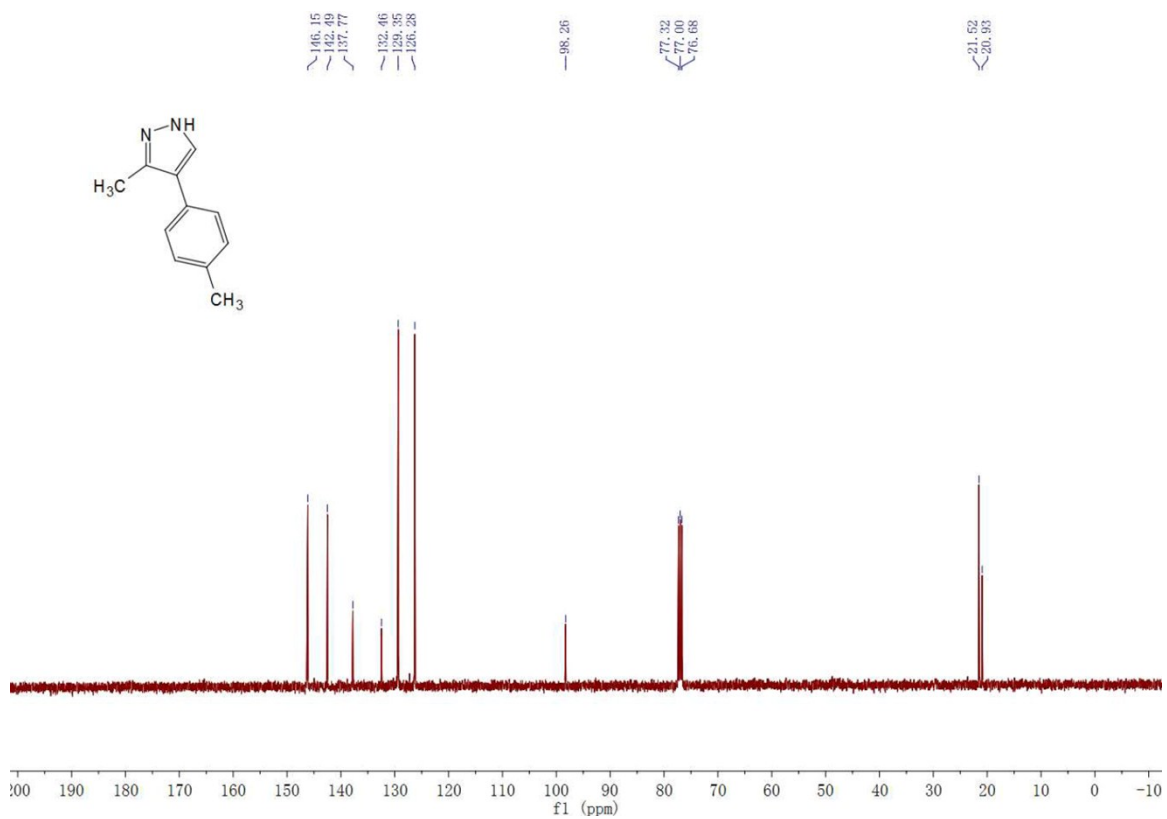

5c

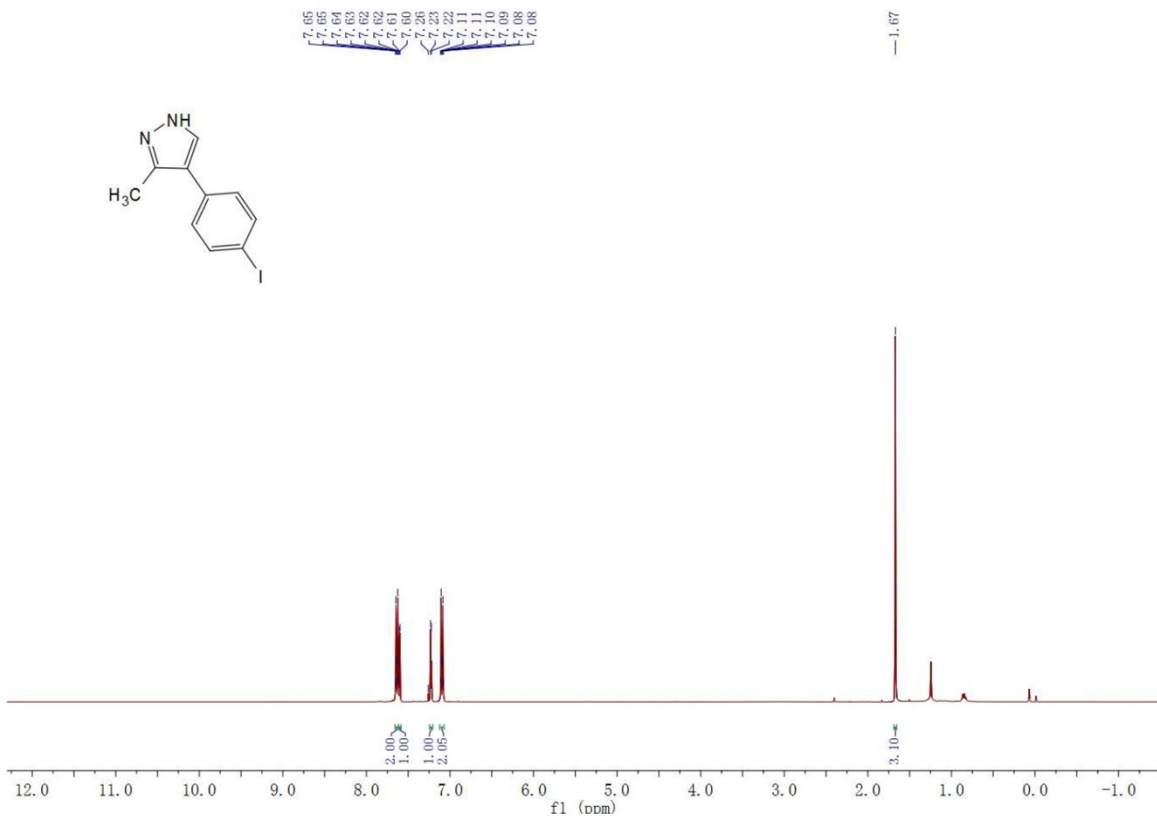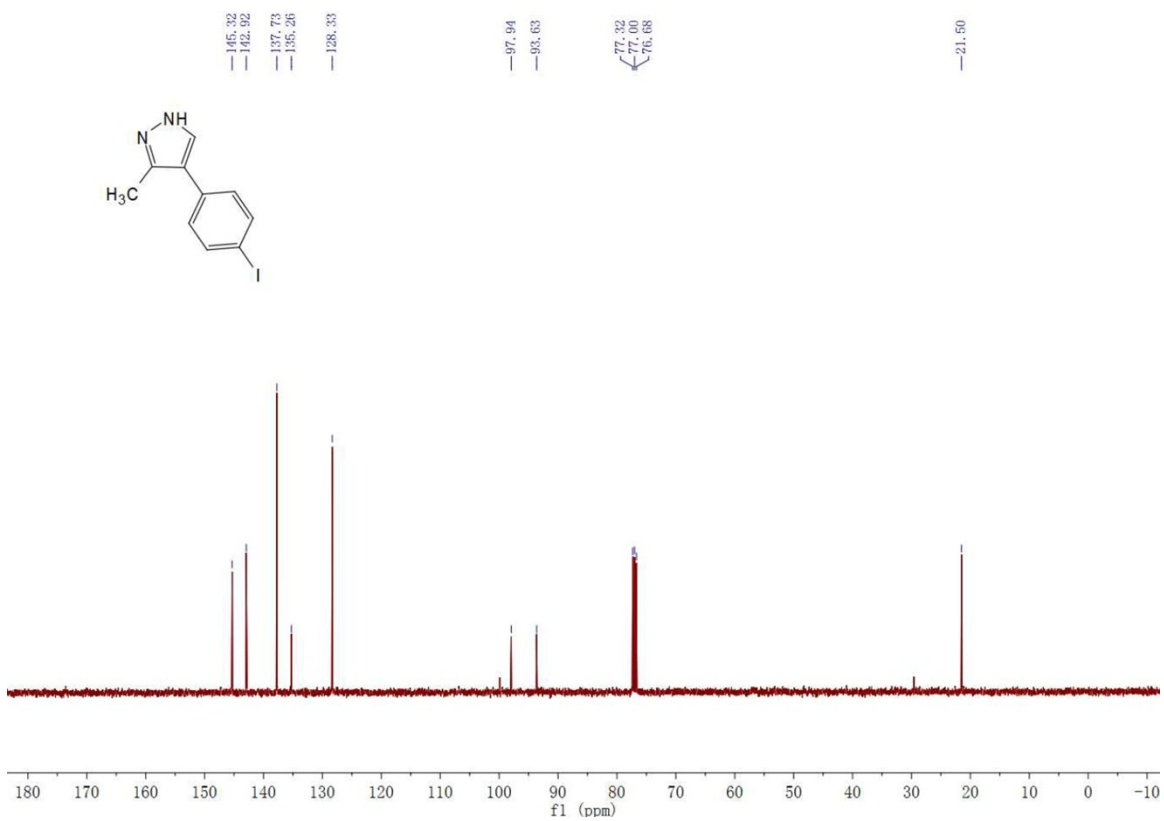

5d

S30

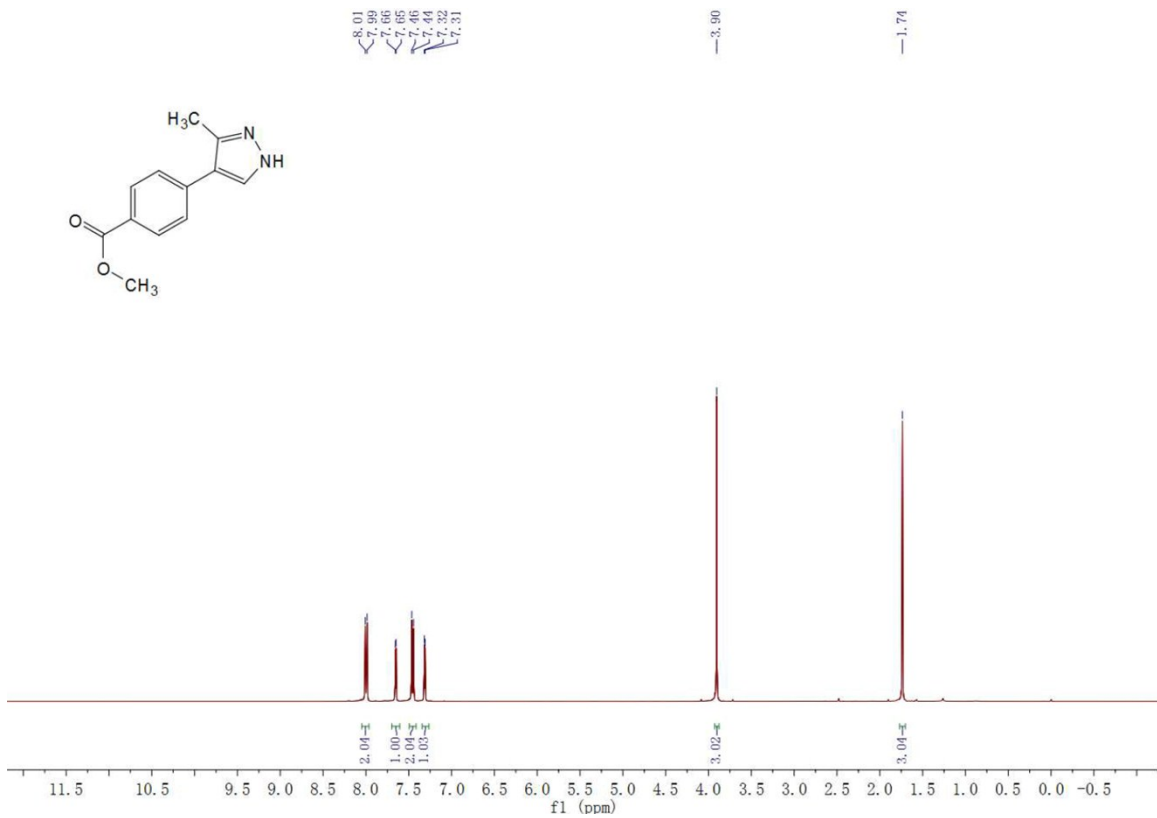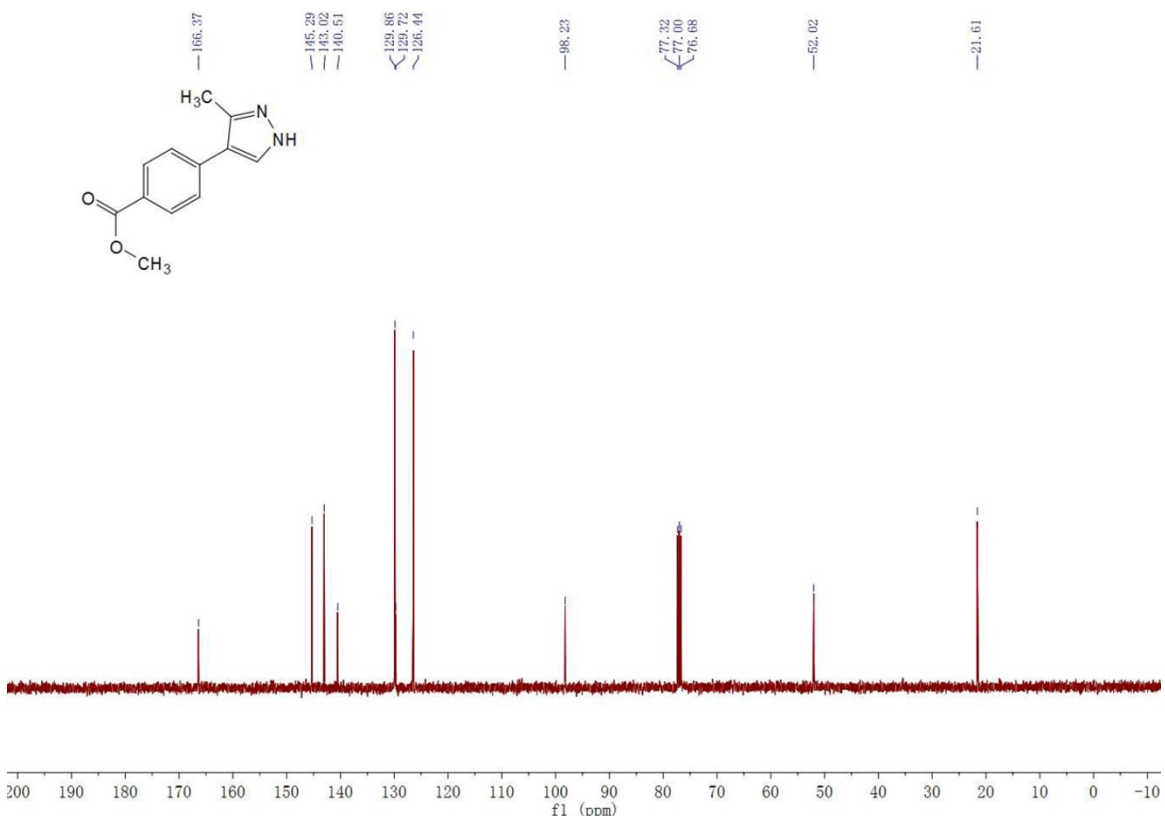

5e

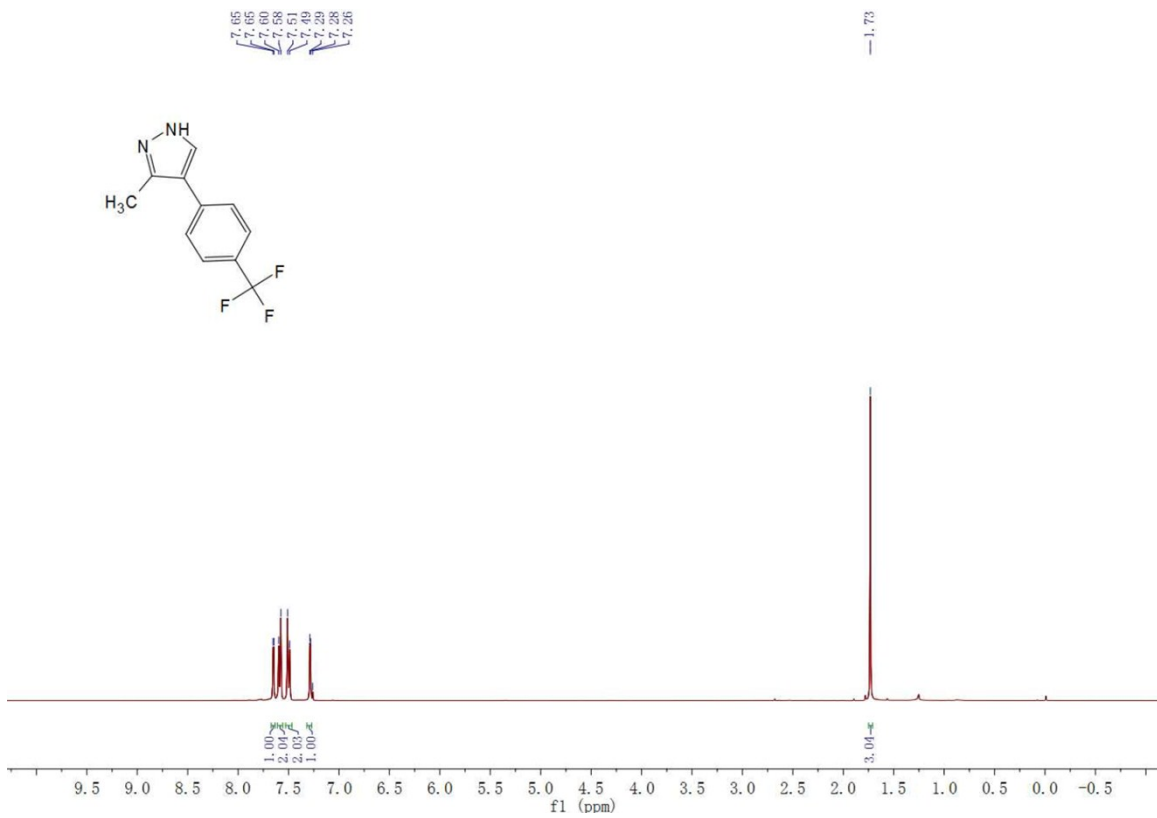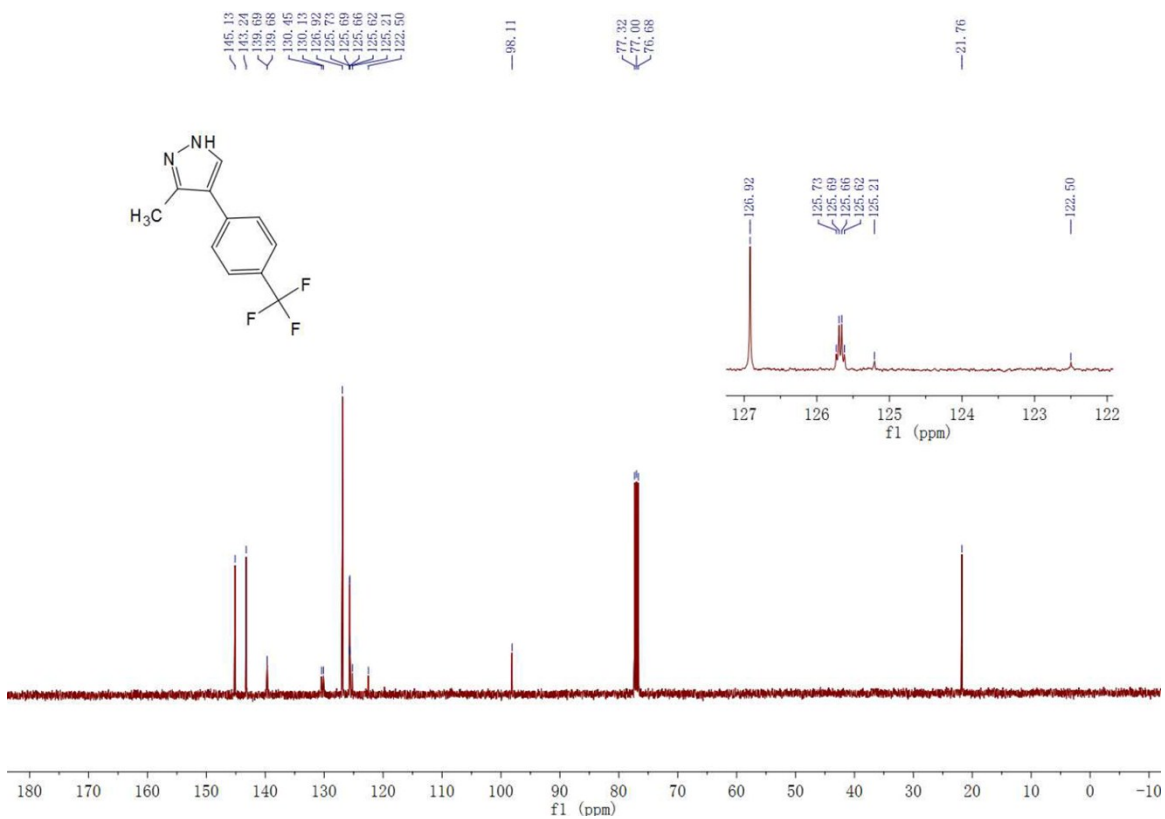

5f



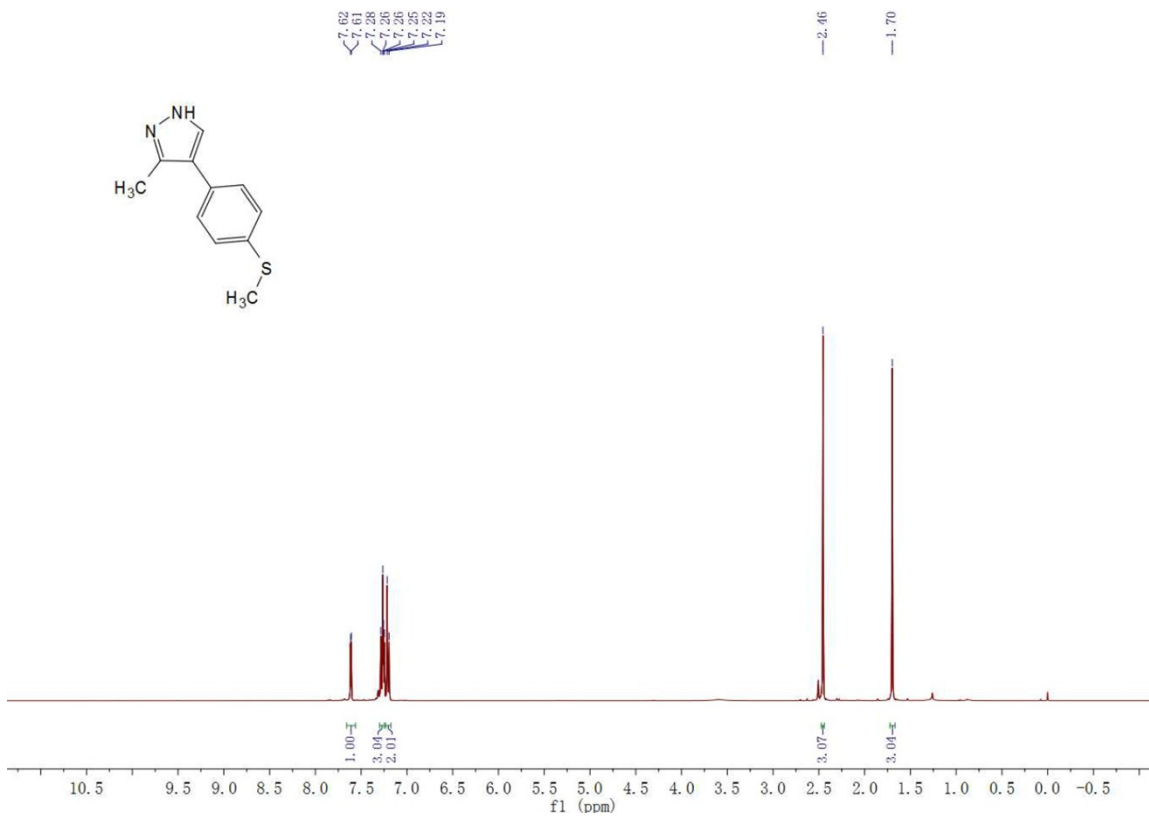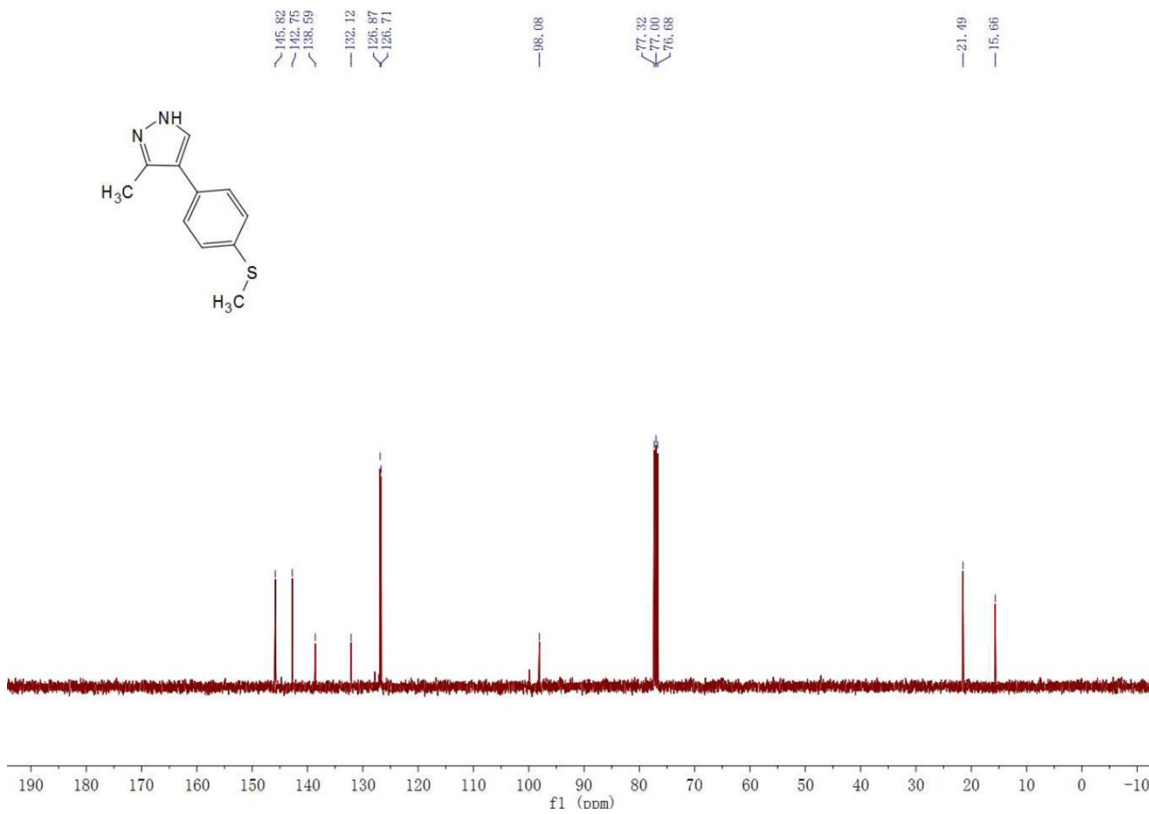

5g

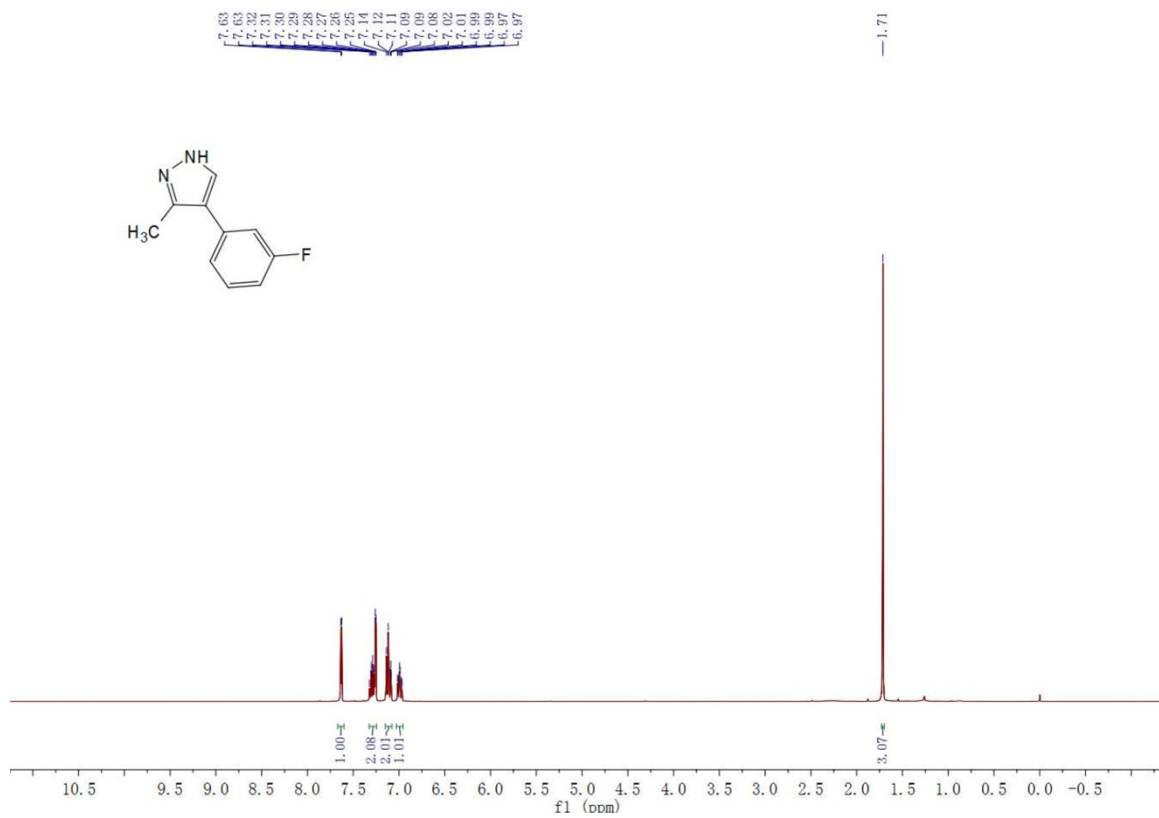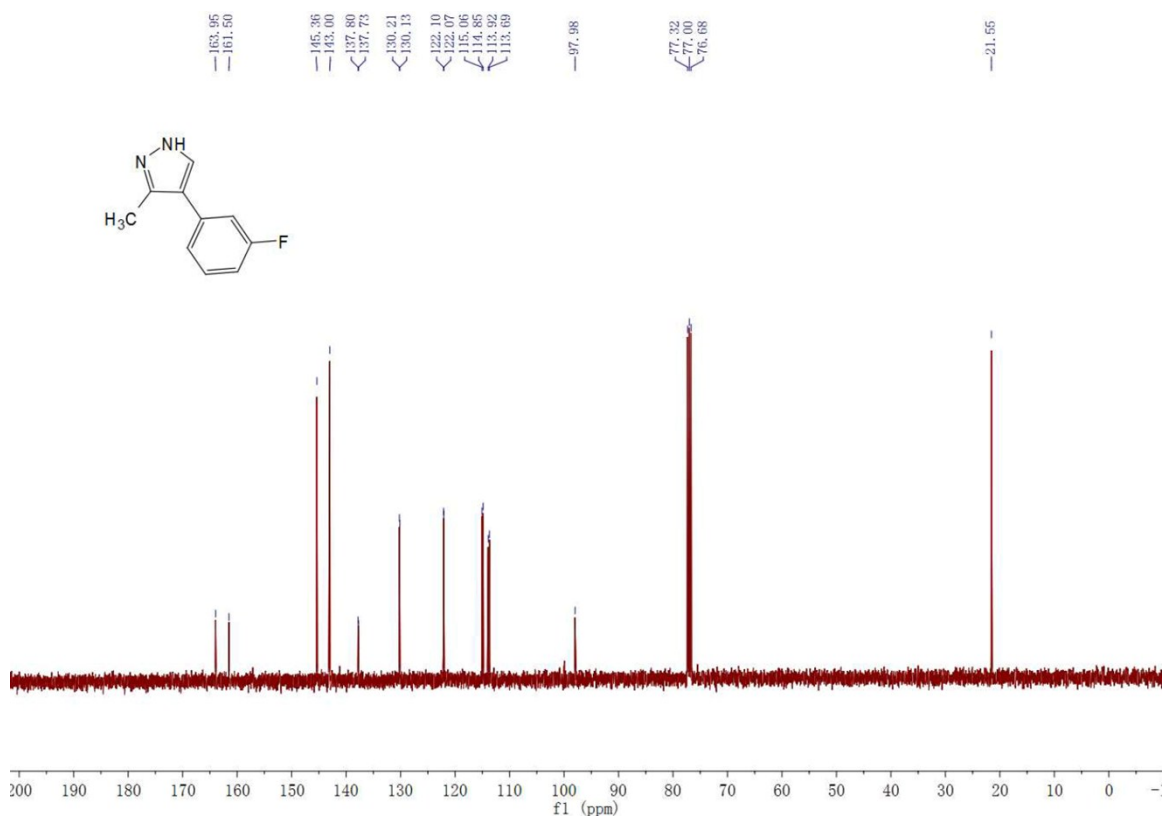

5h

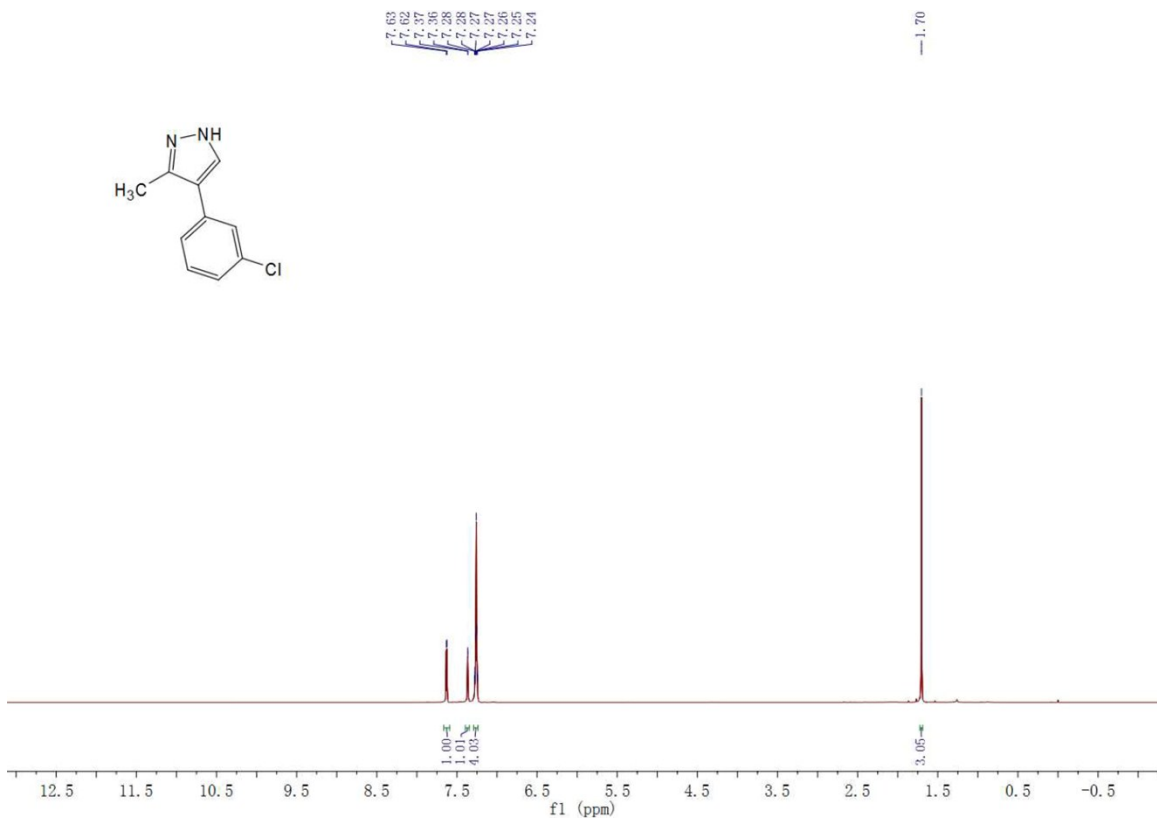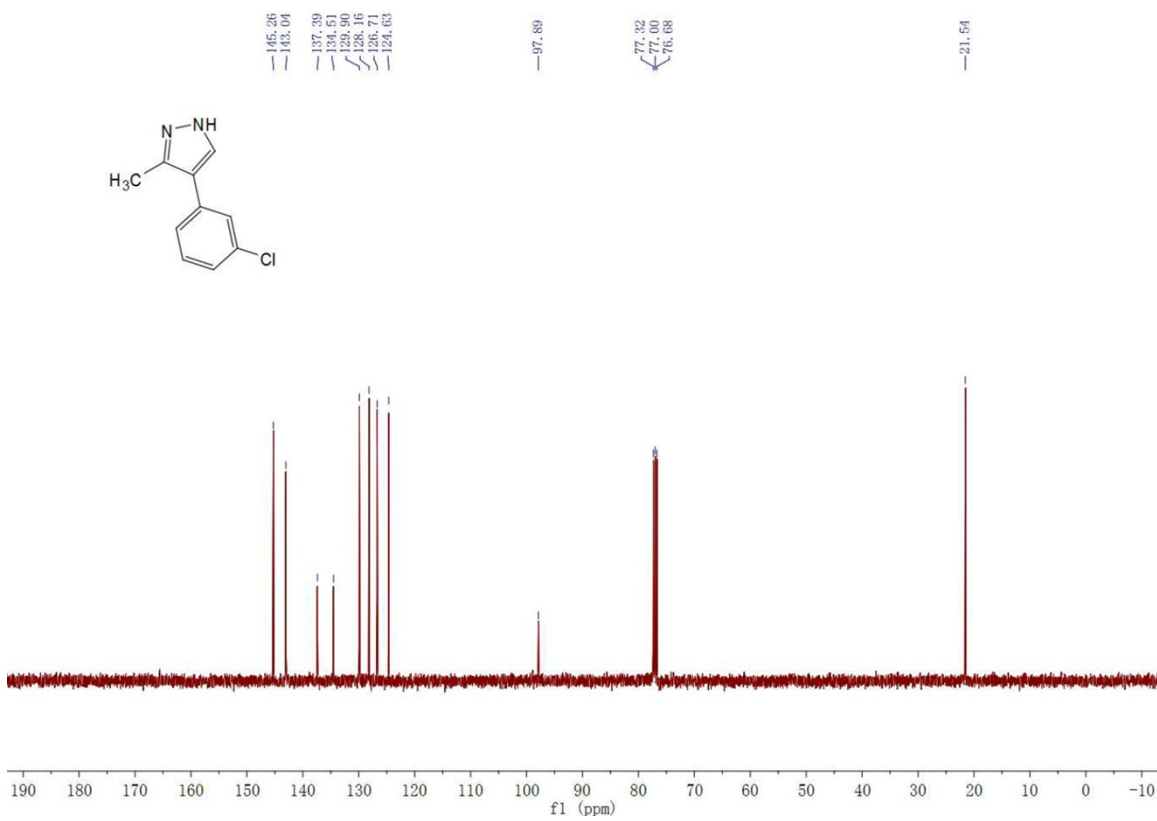

5i

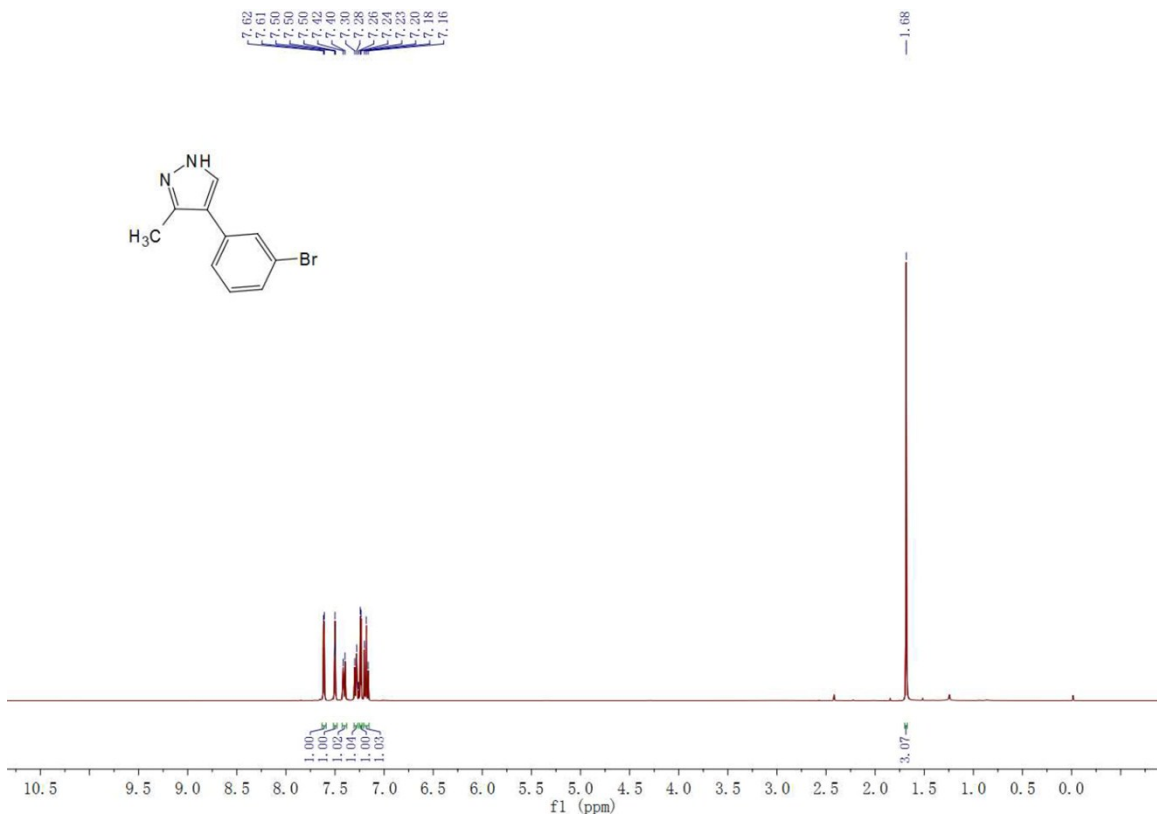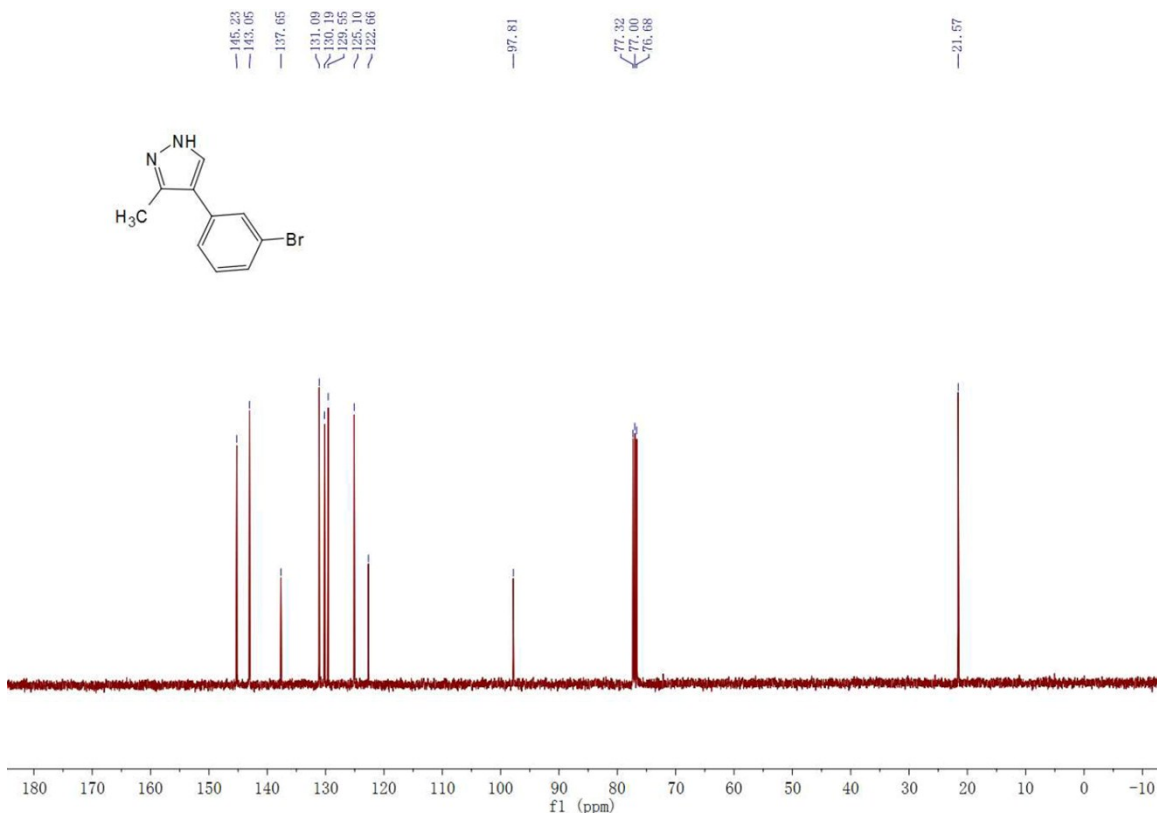

5j

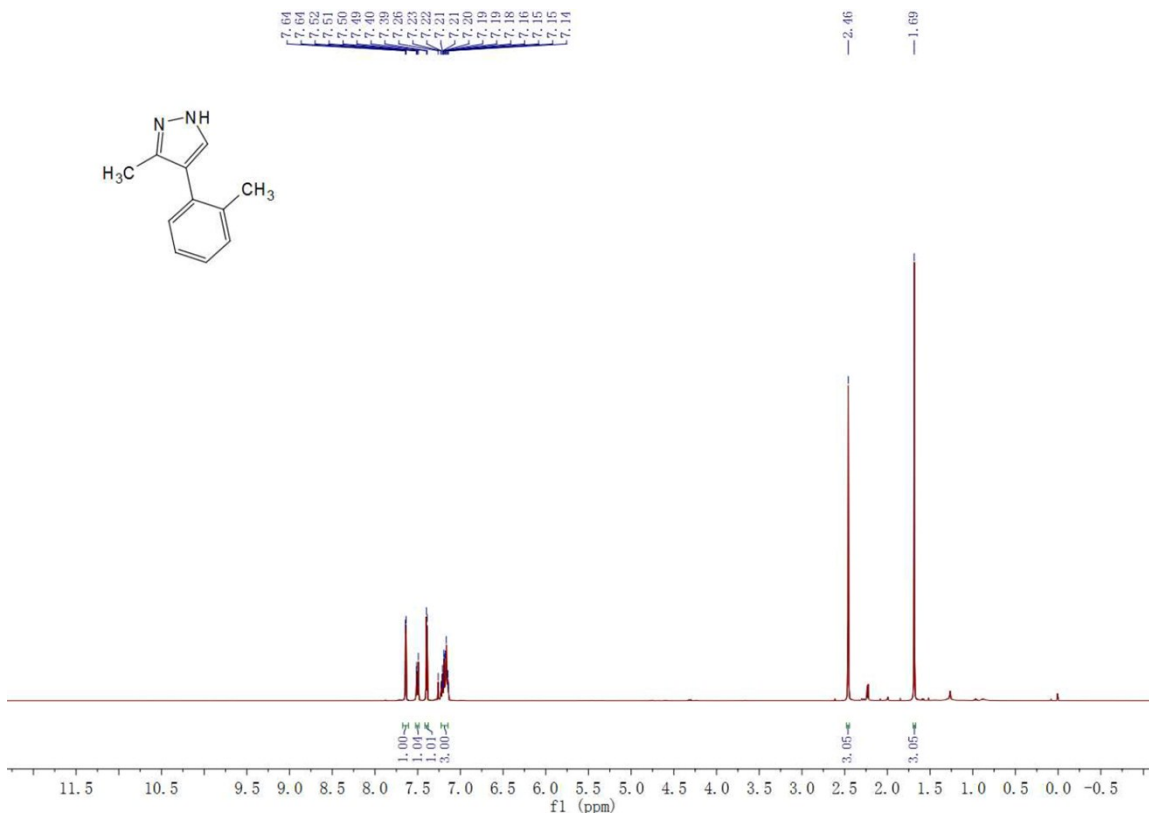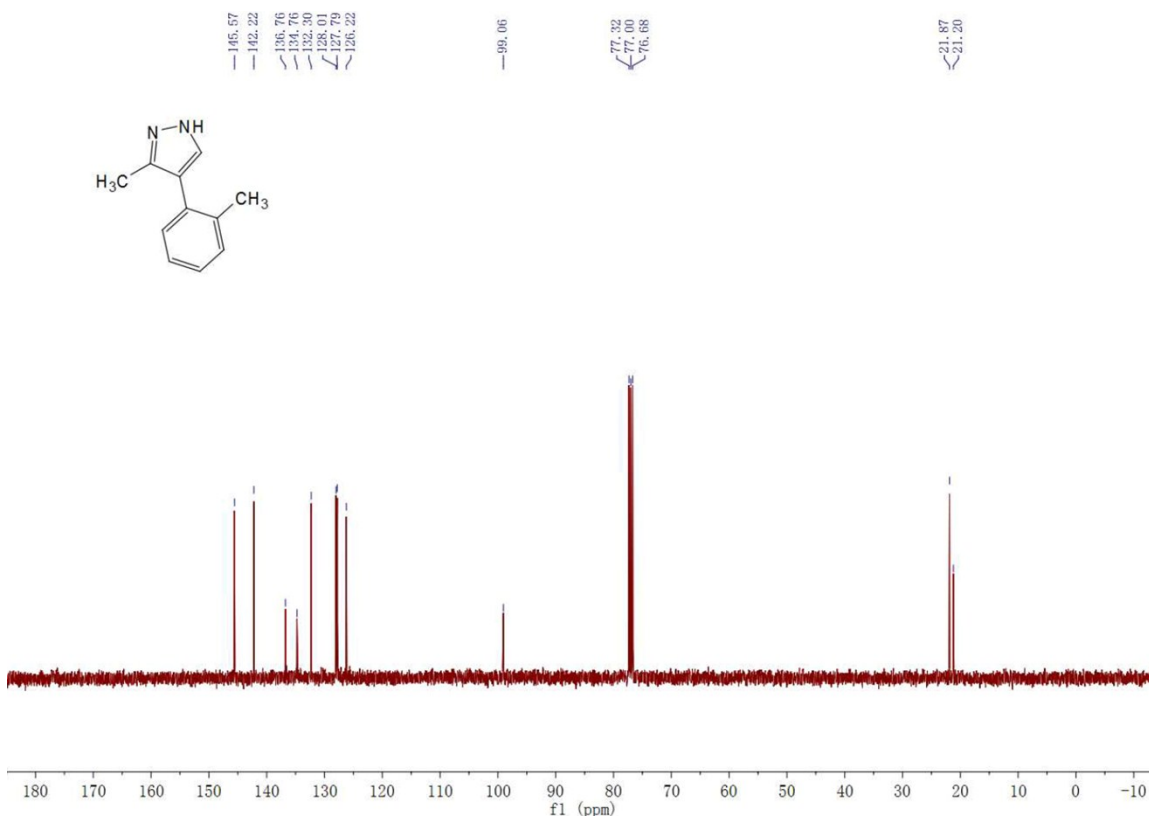

5k

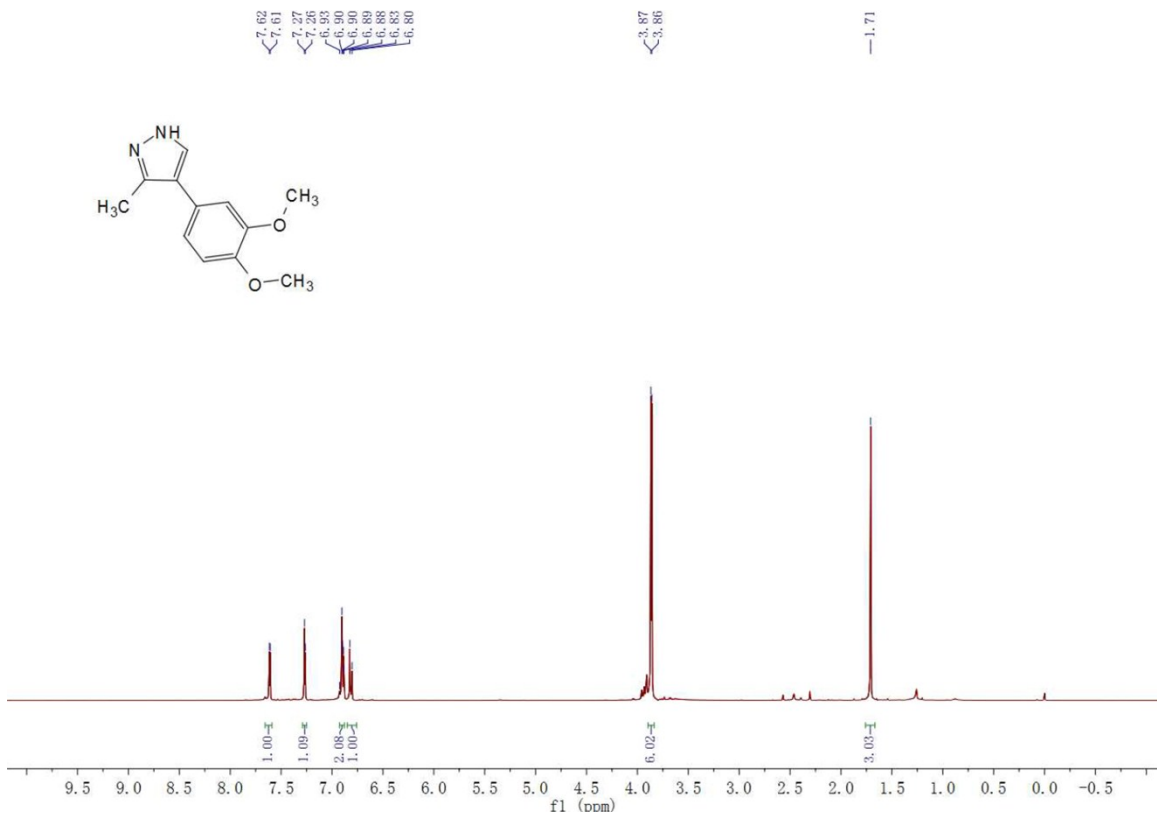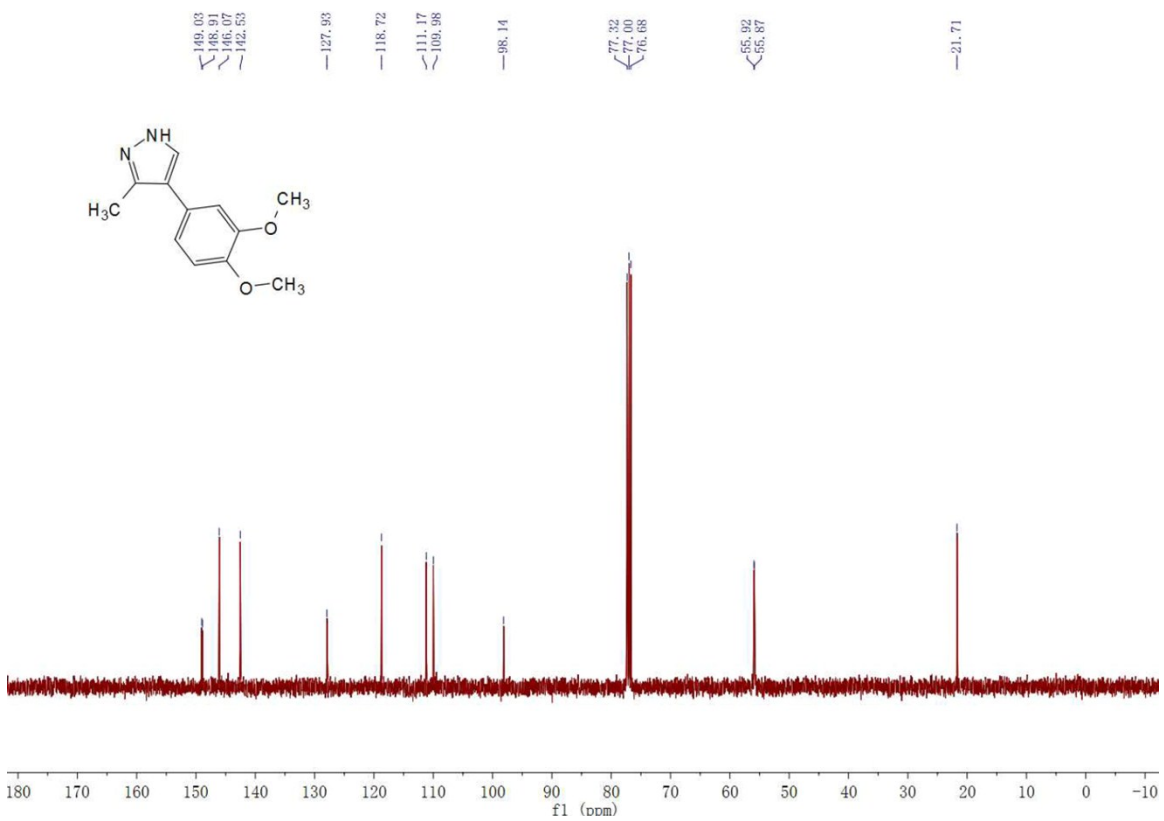

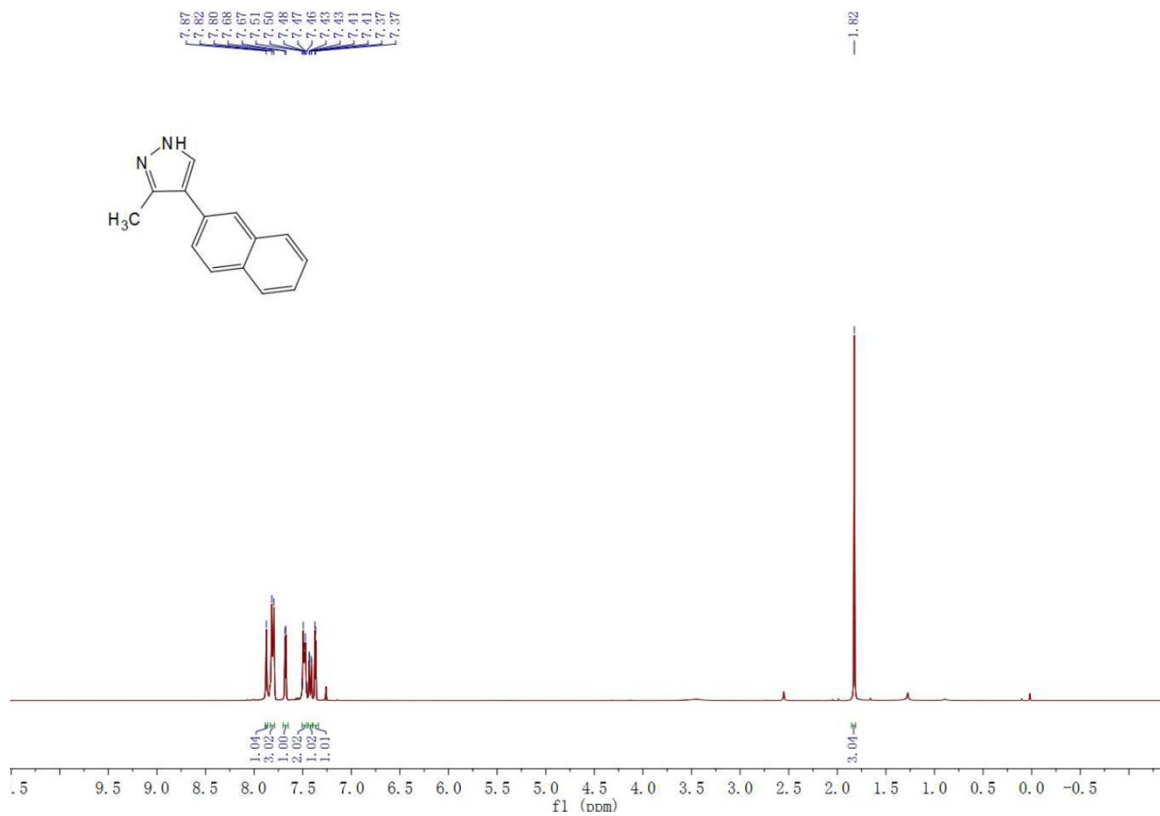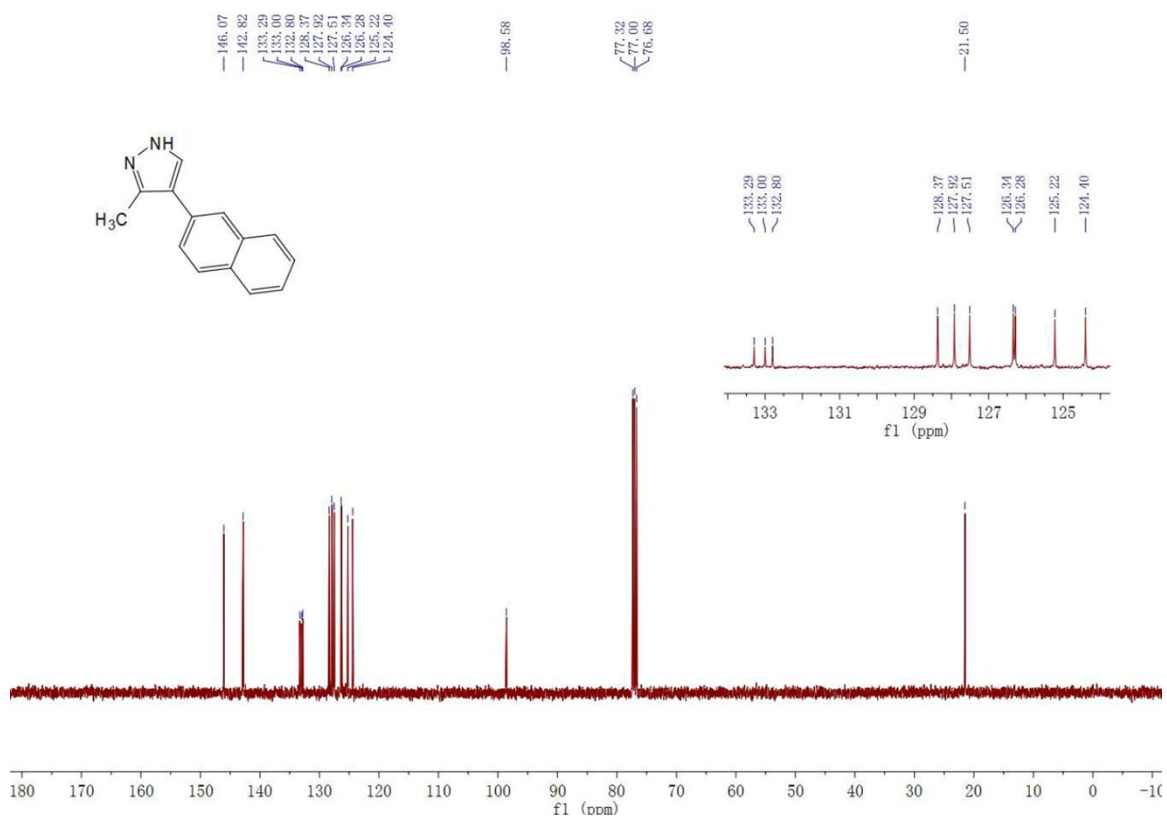

5m

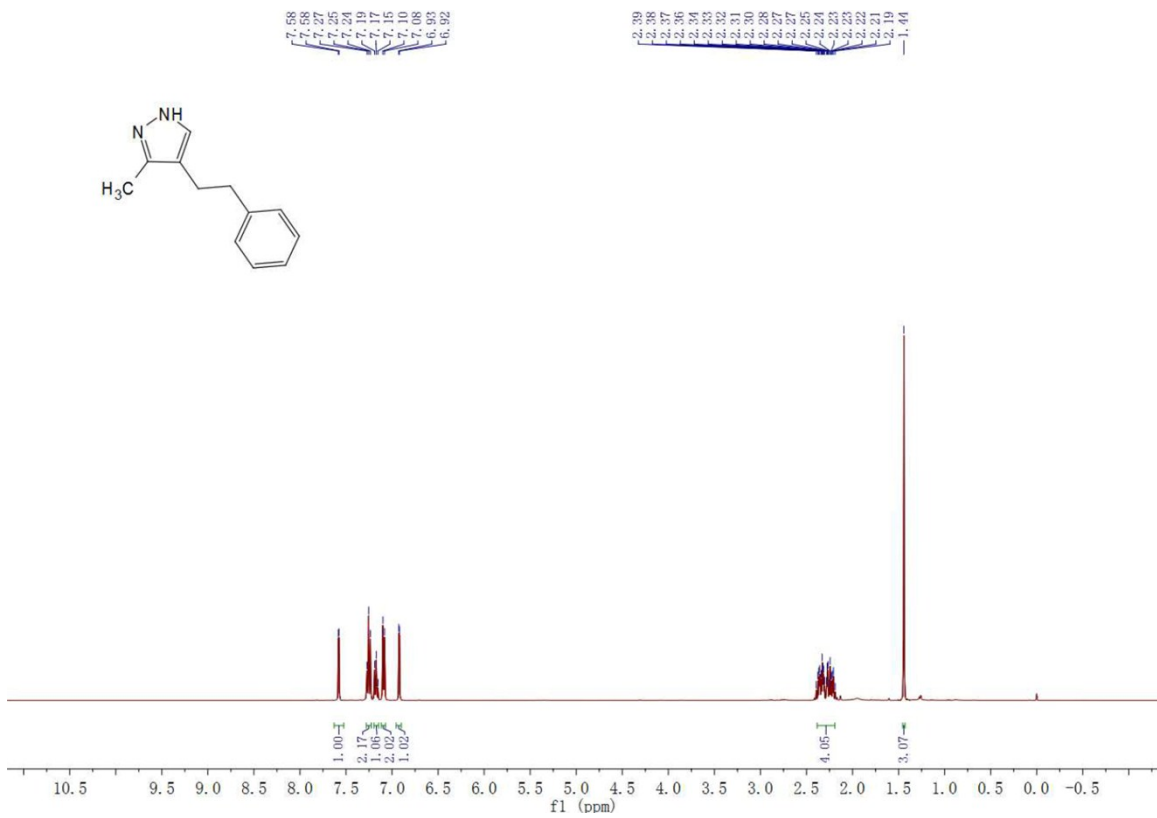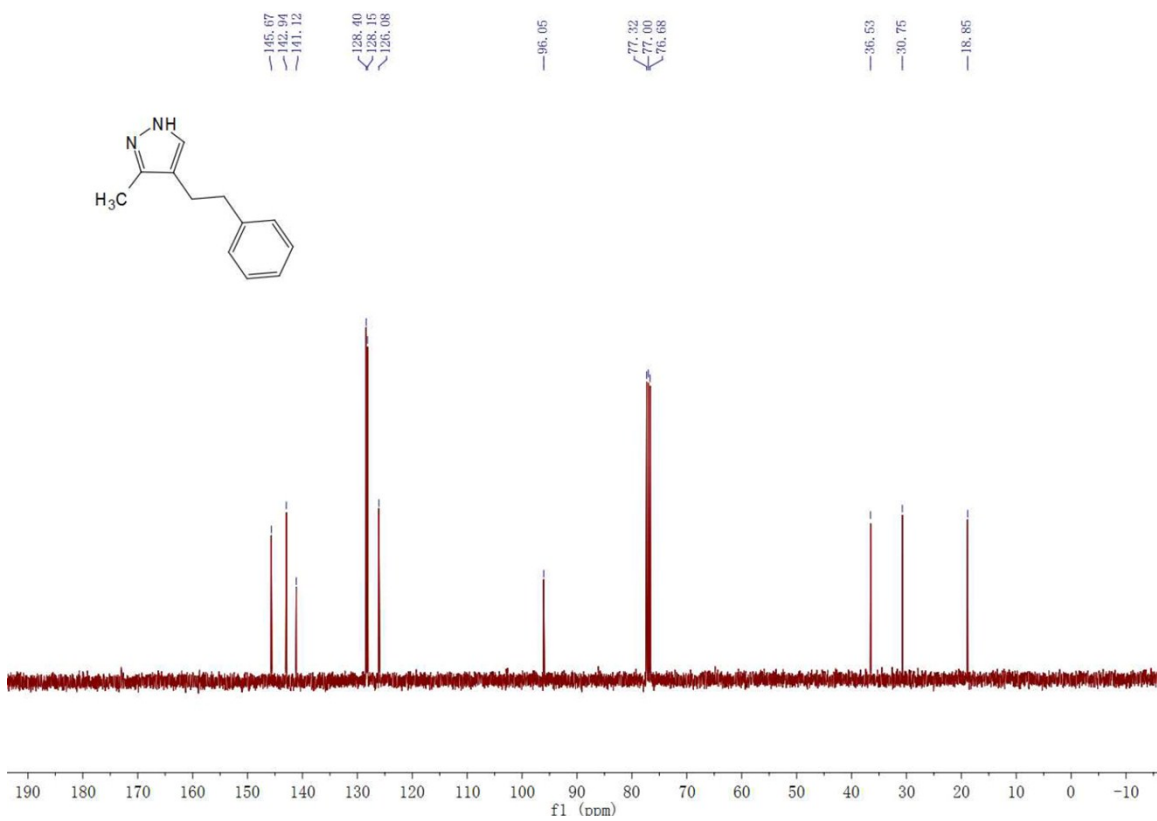

5n



—12.22

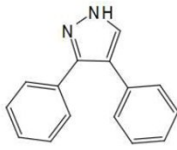

7.57  
7.46  
7.46  
7.30  
7.29  
7.27  
7.24  
7.23  
7.21  
7.18

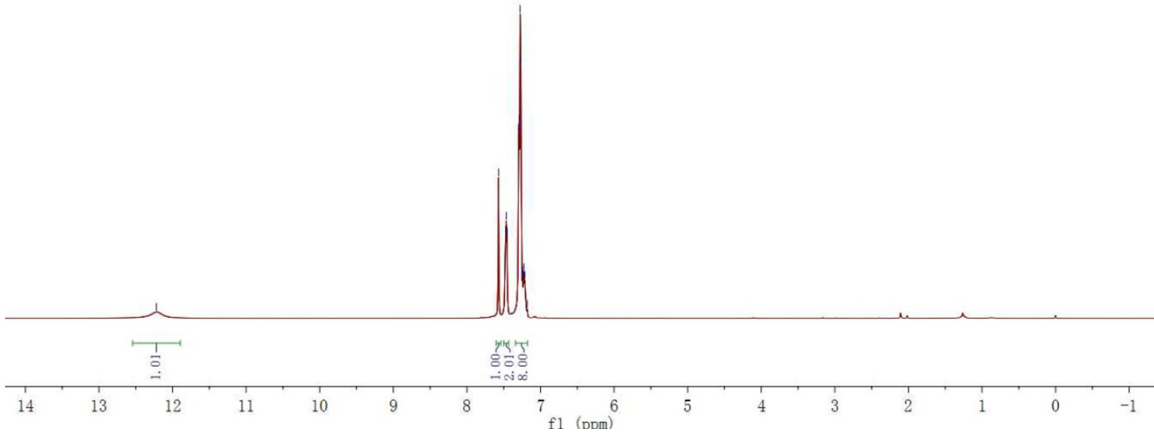

143.81  
134.72  
134.71  
131.41  
128.52  
128.45  
128.39  
128.26  
128.14  
126.48  
119.78

77.32  
77.00  
76.68

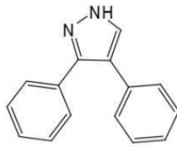

128.52  
128.45  
128.39  
128.26  
128.14

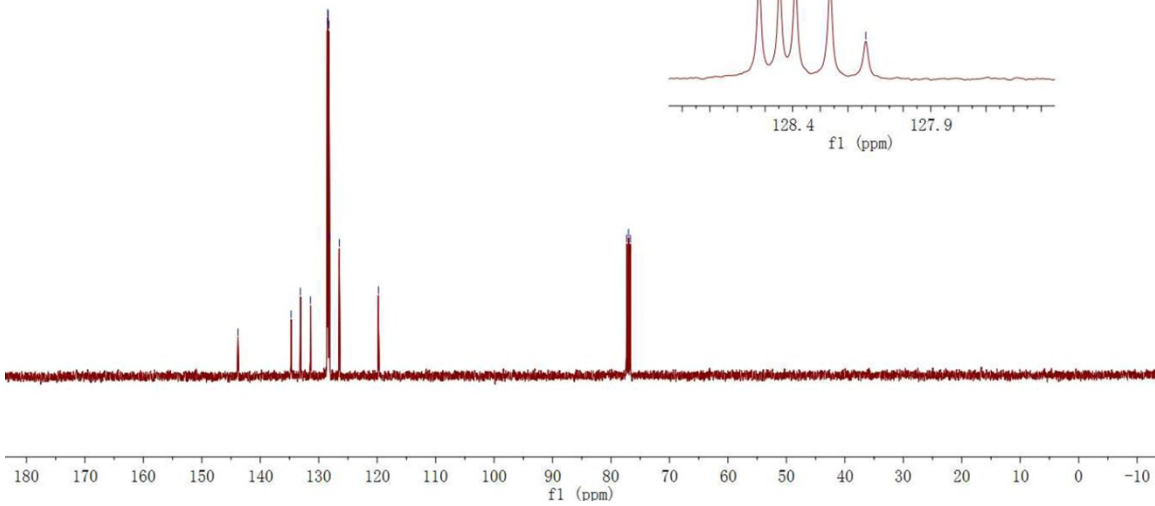

50

S41

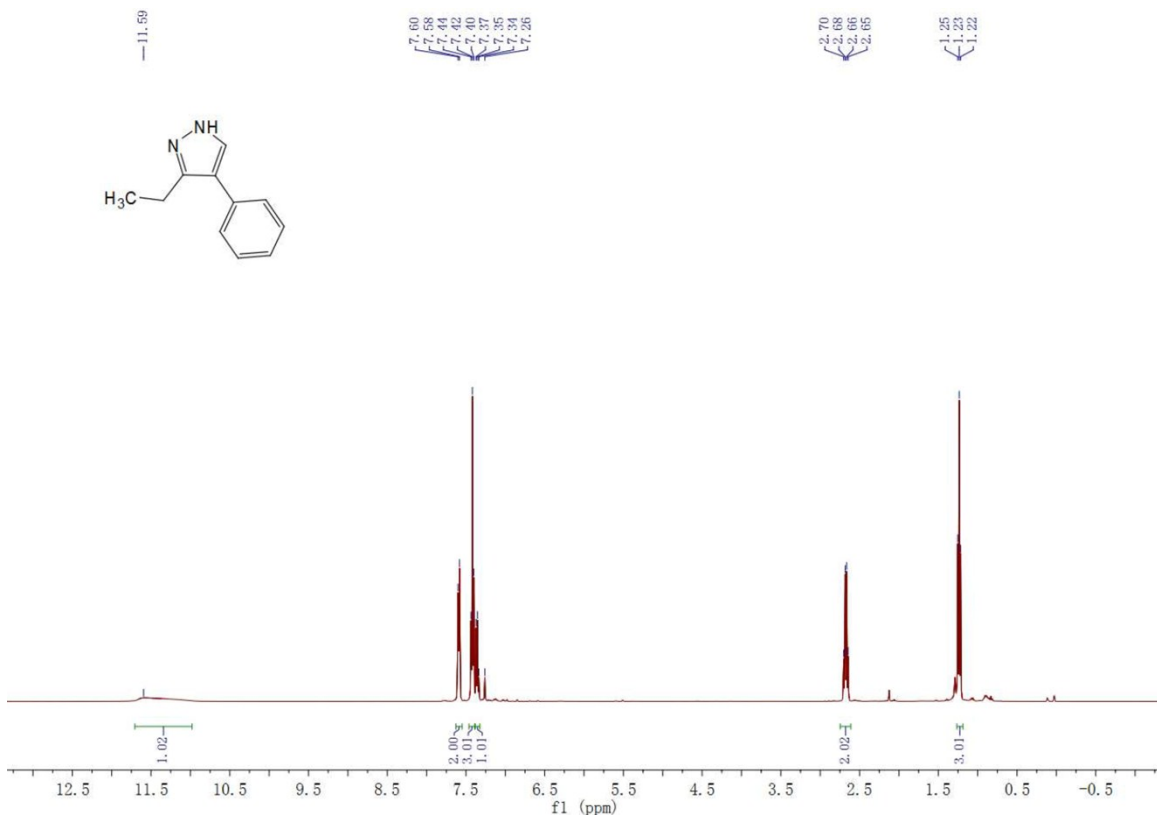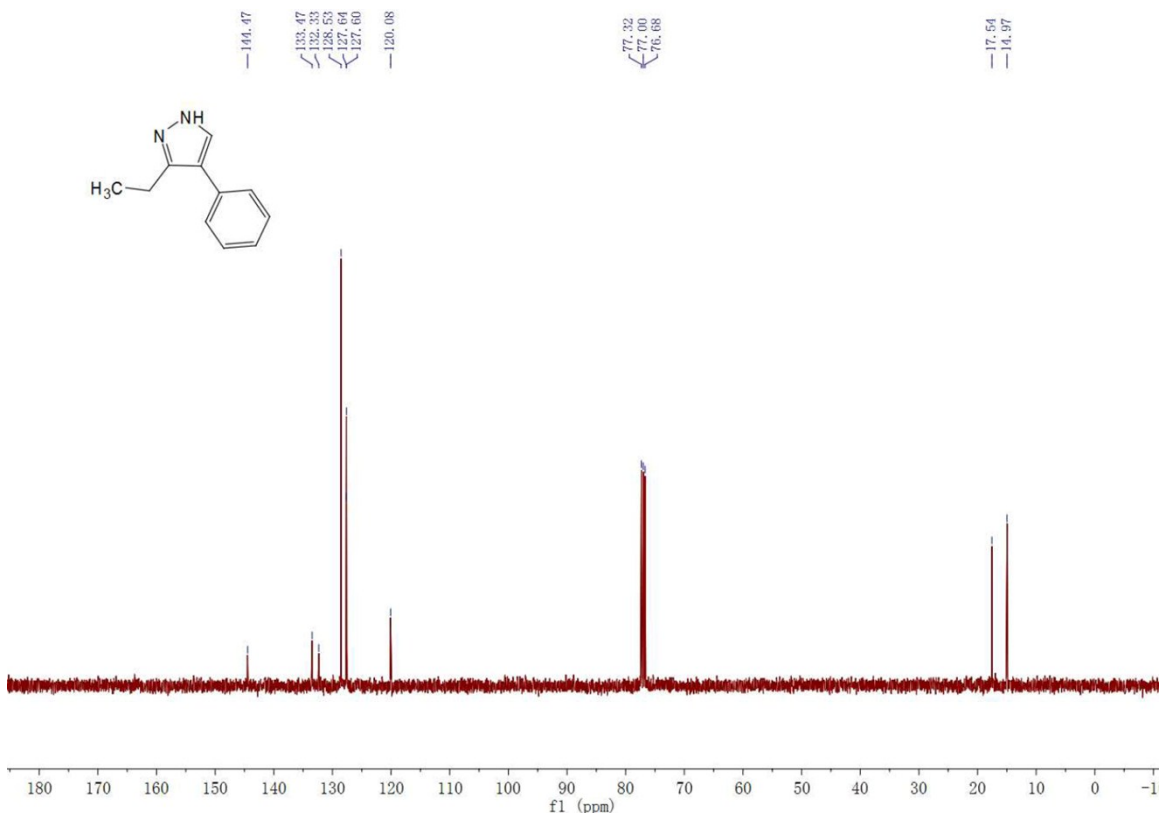

5p

S42

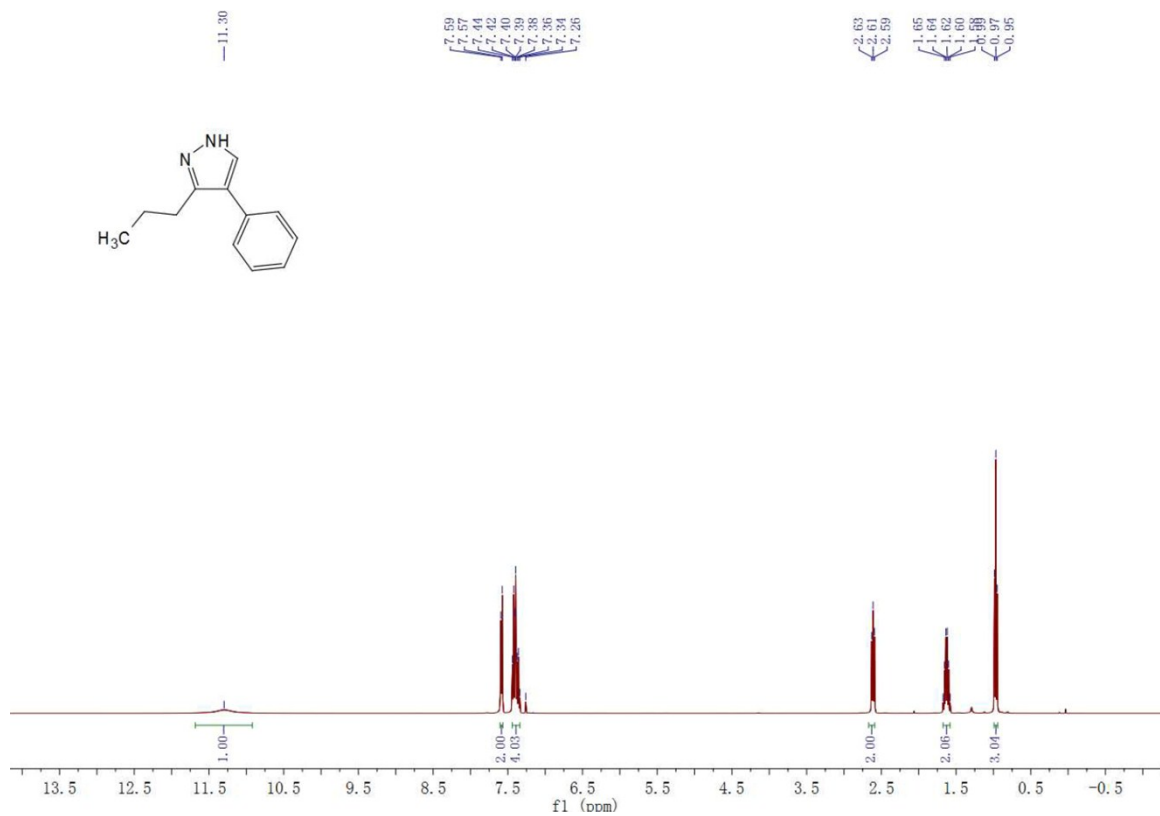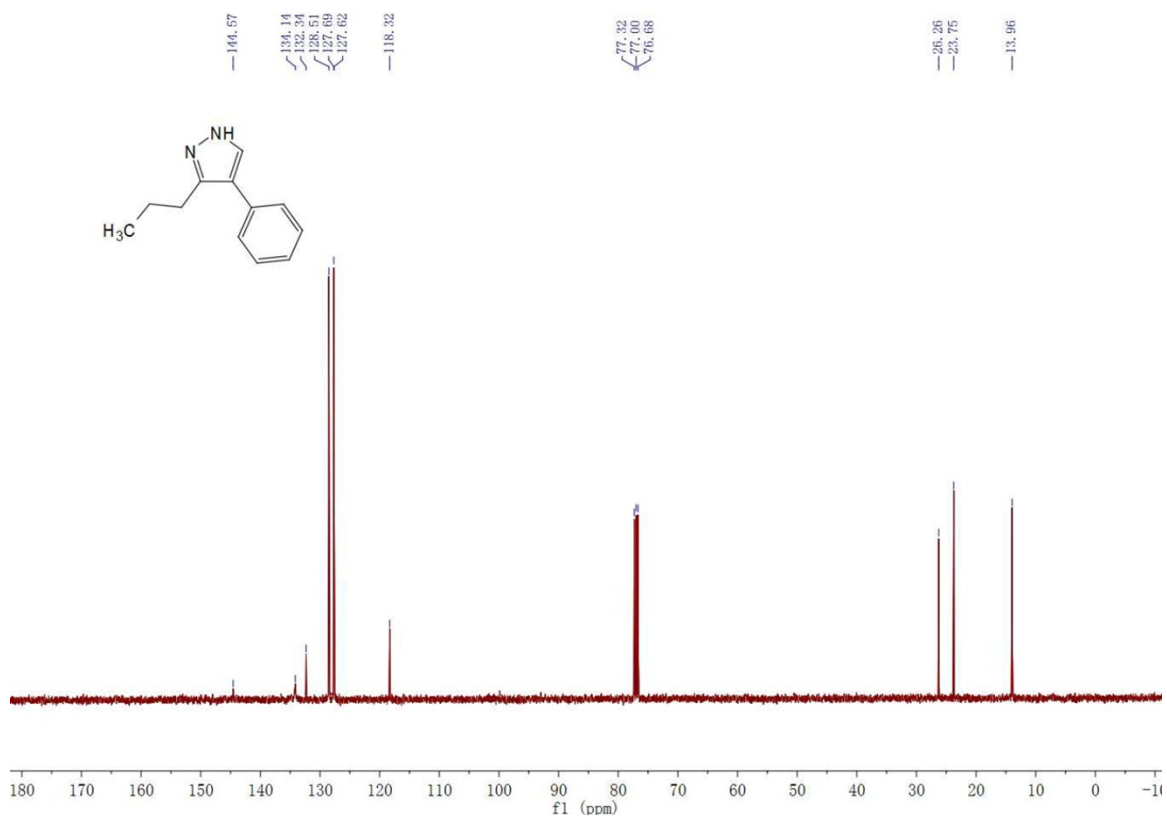

**3a and [D<sub>2</sub>]-3a**

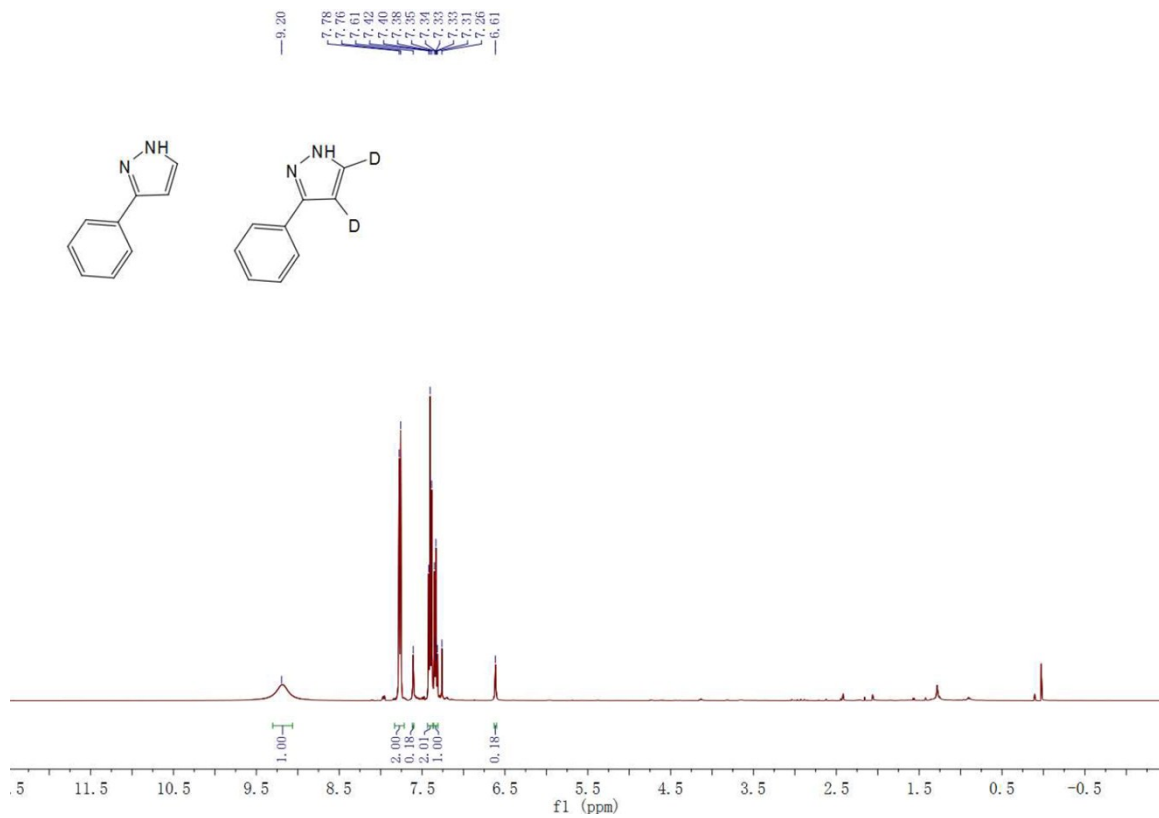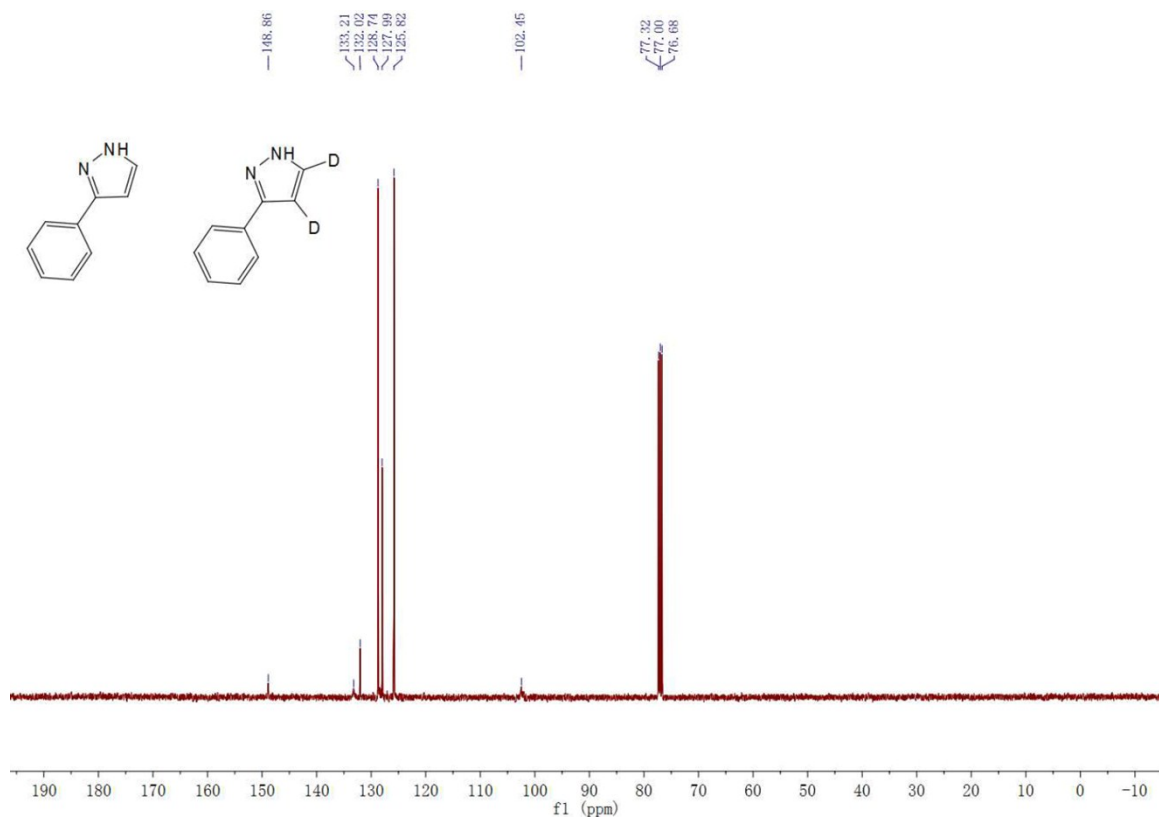

**5a and [D<sub>2</sub>]-5a**

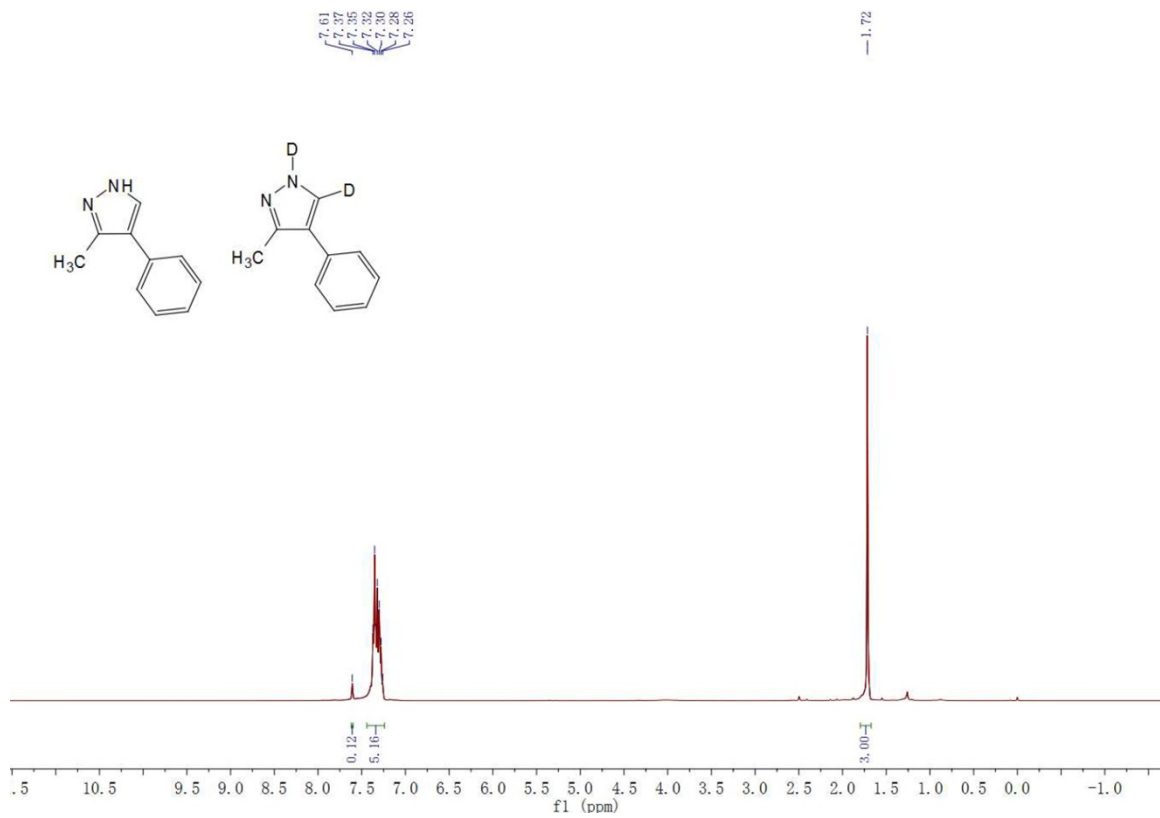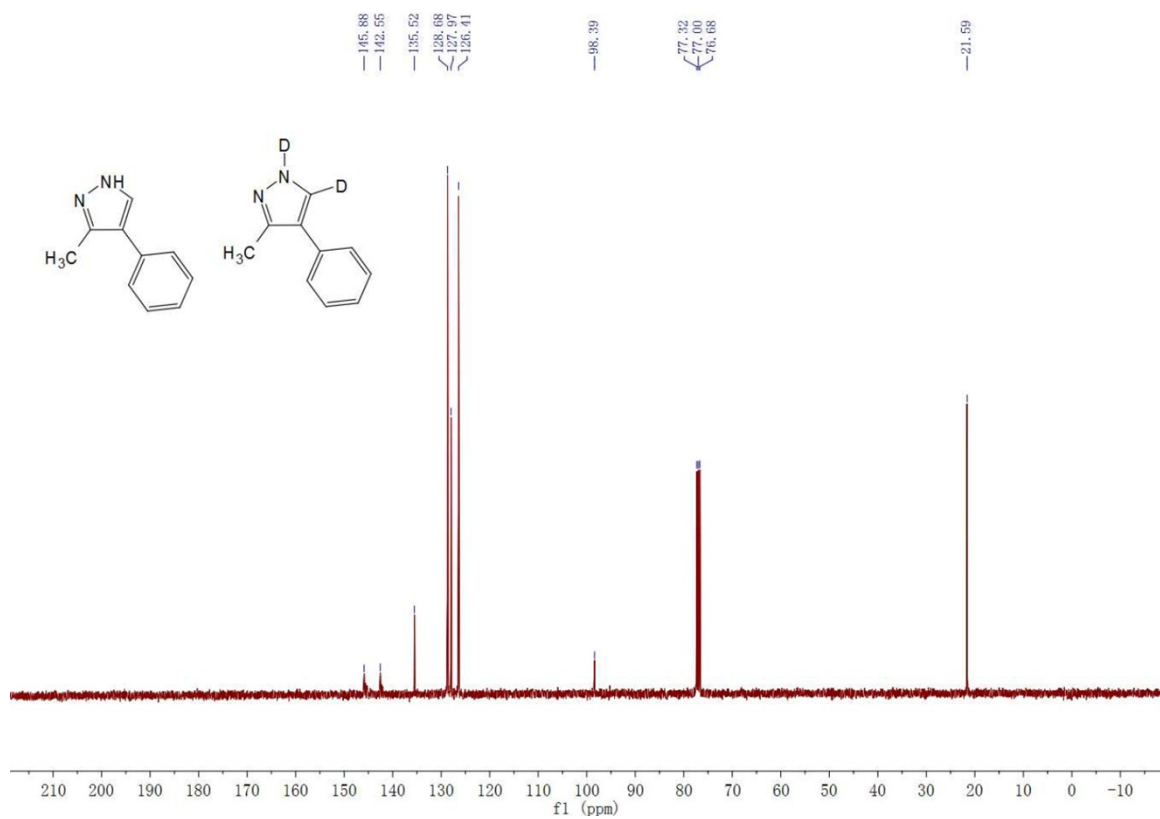

Supplement: c6gc02776h1.pdf [file c6gc02776h1.pdf]
